# Supplementary material for: Biomarkers predictive of long-term fertility found in vaginal lipidome of gilts at weaning
Source: Research Square preprint supplement (doi:10.21203/rs.3.rs-210669/v1), 2021-02-19
Supplement: Supplementary file 1 [file 31950b623952f066a4de35bd.xlsx]

## Sheet: Supplemental Table 1
Supplemental Table 1. Absolute Intensity for PC Lipids
		HF																												IF
Method	Lipid name	3041	3044	3045	3046	3047	3050	3051	3052	3053	3055	3056	3057	3058	3059	3060	3061	3062	3063	3064	3065	3068	3070	3071	3072	3075	3076	3078	3081	3123	3124	3127	3128	3129	3130	3131	3132	3133	3134	3136	3137	3138	3139	3140	3141	3142	3143	3144	3145
PCSM	SM (d18:2/14:0)	1336.94	1298.5	1473.56	1738.36	1409.54	1296.16	1511.76	1777.64	1584.78	1412.48	1517.64	1484.1	1531.24	1515.52	1685.84	1445.94	1585.46	1684.66	1311.9	1612.94	1415.6	1465	1402.38	1539.56	1462.26	1511.9	1480.74	1497.32	1623.08	1344.08	1287.18	1281.92	1413.9	1439.1	1383.56	1631.16	1311.02	1273.52	1334.32	1511.04	1500.84	1508.98	1362.6	1733.92	1454.72	1367.72	1622.08	1422.76
PCSM	PC (44:2)	1393.74	1390.84	1278.32	1546.04	1377.6	1420.84	1404.28	1398.48	1358	1393.7	1348.6	1385.9	1377.84	1508.3	1368.22	1337.12	1354.6	1345.34	1429.6	1297.7	1506.72	1397.98	1247.42	1453.36	1505.16	1488.98	1368.3	1346.26	1350.12	1457.74	1371.62	1401.9	1387.82	1353.74	1437.34	1420.96	1418.44	1395	1267.14	1260.5	1599.78	1422.22	1310.86	1347.62	1295.4	1418.72	1404.96	1295.46
PCSM	PCo(44:5)	1331.48	1495.7	1571.9	1429.46	1380.62	1612.54	1429.6	1479.4	1625.06	1369.18	1412.08	1409.88	1512.46	1563.82	1398.46	1524.4	1521.9	1333.08	1615.98	1454.54	1312	1396.3	1341.06	1498.32	1336.26	1361.44	1476.76	1443.48	1716.1	1296.64	1489.34	1343.74	1319.42	1497.46	1520.42	1441.28	1394.46	1353.74	1661.66	1614.08	1387.4	1326.3	1388.02	1457.12	1312.8	1415.98	1446.36	1477.4
PCSM	PC (42:10)	1485.5	1615.4	1322.34	1721.48	1260.76	1533.32	1562.92	1635.64	1506.84	1441.8	1583.02	1325.58	1525.58	1551	1553.7	1563.28	1470.96	1442.62	1515.34	1375	1356.52	1491.66	1260.72	1609.56	1338.42	1416.68	1405.72	1453.78	1572.4	1520.3	1532.28	1421.68	1378.76	1559.52	1428.98	1513.24	1460.78	1358.28	1352.24	1618.42	1347.62	1435.34	1598.94	1284.48	1357.62	1570.1	1684.84	1438.98
PCSM	PC (42:4)	1556.36	1611.66	1378.4	1894.06	1420.28	1725.66	1440.86	1748.02	1731.54	1387.32	1613.82	1569.96	1692.5	1533.5	1543.16	1550.26	1706.5	1590.66	1680.68	1613.76	1505.2	1521.4	1413.84	1497.7	1739.74	1451.72	1470.2	1435.8	1561.04	1620.8	1637.68	1667.52	1588.48	1417.84	1461.4	1631.36	1522.8	1534.98	1505.58	1709.56	1700.06	1483.68	1709.74	1455.24	1393.18	1498.4	2074.92	1398.92
PCSM	PC (42:5)	2200.78	1550.06	1474.1	1775.34	1452.16	1547.6	1476.66	1775.54	1658.24	1521.1	1711.88	1895.72	1579.84	1621.32	1678.42	2195.98	1751.92	1687.1	1615.88	1702.42	1626	1885.6	1604.3	1747.78	1659.76	1572.28	1475	1399.62	1897.86	1820.68	1609.84	1465.94	1430.34	1511.32	1564.56	1779.76	1575.7	1546.46	1569.08	1950.86	1628.26	1601.4	1807.7	1663.94	1539.68	1571.06	1918.42	1571.32
PCSM	PC (42:11)	1434.08	1488.84	1469.4	1749.8	1367.48	1703.26	1472.66	1701.18	1813.62	1597.9	1377.3	1517.9	1496.26	1482.04	1850.28	1502.52	1536.22	1480.04	1470.92	1438.38	1736.3	1651.06	1593.12	1574.48	1398.32	1501.8	1376.48	1351.92	1702.28	1496.3	1234.82	1380.94	1361.2	1405.5	1695.96	1707.46	1416.06	1430.88	1504.02	1569.56	1479.58	1397.6	1451.48	1262.48	1367.2	1513.14	1602.32	1453.42
PCSM	SM (d18:1/12:0)	1351.74	1550.12	1343.56	1663.56	1435.3	1579.18	1563.68	1762.24	1522.5	1386.72	1456.5	1532.54	1435.02	1467.74	1458.52	1494.78	1597.54	1329.7	1240.1	1562.04	1704.02	1652.02	1315.12	1413.84	1458.72	1501.9	1410.94	1387.16	1663.24	1297.58	1491.24	1440.44	1449.08	1276.04	1382.62	1500.44	1348.88	1723.08	1409.56	1405.82	1436.46	1631.1	1592.98	1918.46	1562.04	1652.16	1772.02	1512.54
PCSM	PC (32:5)	1784.88	1780	1593.28	2044.86	1577.74	1477.98	1565.12	1743.68	1764.26	1624.3	1410.44	1808.28	1777.78	1632.08	1648.34	1634.18	1518.48	1730.46	1593.94	1718.94	1670.02	1837.42	1517.28	1600.8	1631.52	1481.98	1454.34	1559.52	1600.18	1619.68	1524.6	1792.24	1297.26	1837.2	1829.38	1582.5	1382.3	1523.92	1368.42	1698.66	1562.34	1722.06	1599.34	1510.78	1681.54	1651.94	2018.06	1593.26
PCSM	PC (32:3)	1407.96	1515.5	1405.96	1796.7	1433.96	1525	1404.84	1444.5	1474.9	1309.34	1577.34	1347.18	1925.24	1598.58	1629.54	1636.48	1505.54	1754.78	1460.74	1579.46	1419.9	1464.68	1342.54	1484.52	1437.46	1319.62	1620.7	1420.64	1693.42	1464.84	1549.74	1392	1375.58	1457.08	1461.24	1344.3	1461	1616.6	1454.48	1509.58	1639.26	1283.34	1372.72	1391.58	1371.7	1416.66	1733.7	1349.26
PCSM	PCo(32:3)	1659	1319.78	1388.06	2184.12	1435.98	1634.72	1561.32	1713.92	1544.34	1402.58	1476.2	1583.74	1433.34	1841.18	1650.82	1924.38	1395.12	1751.92	1342.12	1734.94	1610.96	1738.74	1439.22	1681.24	1320.18	1427.82	1410.8	1496.9	1901.38	1472.26	1818.88	1435.74	1464	1522.64	1382.18	1619.44	1510.66	1739.6	1428.88	1636.8	1551.22	1589.4	1318.2	1837.62	1532.1	1434.76	1482.8	1551.62
PCSM	PC (44:1)	1400.26	1572.16	1454.26	1683.7	1329.62	1364.18	1332.56	1410.66	1652.84	1562.94	1426.9	1406.24	1882.66	1709.12	1459.36	1596	1439	1495.8	1651.08	1400.64	1459.3	1493.04	1365.46	1326.12	1349.28	1453.84	1579.5	1437.88	1399.66	1326.94	1427.66	1424.94	1294.78	1462.14	1391.16	1692.58	1506.04	1382.88	1392.18	1419.06	1341.16	1643.72	1647.36	1556.26	1467.98	1459.28	1773.98	1399.3
PCSM	PCp(42:4)	1395.8	1691.04	1414.28	1823.36	1516.12	1372.58	1562.56	1659.32	1599.48	1727.62	1459.32	1470.76	1638.02	1636.58	1580.94	1538.92	1590.38	1609.94	1901.44	1916.6	1657.4	1725.2	1639.42	1634.38	1415.9	1423.48	1481.96	1437.32	1797.68	1408.66	1626.04	1471.14	1392.7	1356.7	1536.86	1412.2	1386.56	1642.64	1482.6	1874.6	1452.98	1616.66	1485.3	1421.04	1282.22	1731.84	2041.42	1555.4
PCSM	PCo(42:2)	1626.68	1681.26	1524.46	1579.26	1533.94	1556.58	1454.44	1941.68	1515.66	1532.1	1880.82	1668.22	1656.34	1559.8	1458.78	1647.78	1671.66	1605.38	1538.54	1786.7	1720.52	1518.66	1591.84	1588.98	1430.4	1460.54	1409.1	1555.88	1631.56	1836.02	1385.28	1457.68	1372.54	1657.2	1447.6	1664.4	1496.58	1474.2	1530.72	1677.72	1457.04	1380.74	1353.34	1475.7	1468.12	1773.08	1941.9	1655.06
PCSM	PCo(42:4)	1576.68	1479.16	1468.2	1666.42	1370.42	1558.7	1598.9	1439.56	1580.32	1519.36	1763.26	1499.5	1660.32	1703.02	1591.32	1554.86	1430.78	1556.32	1533.08	1590.28	1537.82	1393.6	1478.6	1575.8	1390.3	1511.88	1437.12	1298.86	2136.3	1560.96	1947.38	1481.2	1444.92	1409.52	1594.06	1498.74	1428.7	1628.02	1686.52	2002.04	1479.42	1626.46	1487.64	1495.68	1343.58	1662.38	1461.98	1823.12
PCSM	PC (42:7)	1501.62	1723.94	1504.44	1717.46	1364.2	1666.76	1437.52	1656.22	1734.96	1591.64	1570.02	1689.6	1771.36	2264.92	1553.28	1645.6	1680.64	1951.6	1888.48	1871.84	1565.58	1830.4	1451.78	1526.14	1570.16	1431.68	1490.3	1427.08	1564.34	1412.82	1472.62	1652.12	1443.9	1566.36	1433.58	1602.64	1532.66	1382.16	1386.38	1860.46	1624.46	1584.54	1709.9	1498.4	1391.5	1578.76	2031.72	1487.36
PCSM	SM (d18:0/12:0)	1499.26	1447.7	1592.7	1420.02	1288.2	1267.62	1421.96	1544.1	1473.06	1421.58	1407.96	1421.14	1596.8	1418.88	1376.62	1426.66	1461.12	1542.32	1448.78	1392.34	1502.68	1593.68	1287.36	1446.6	1406.8	1353.08	1346.36	1512.08	1341.68	1343.46	1382.38	1494.02	1394.52	1506.26	1414.84	1819.74	1507.9	1614.32	1467.46	1481.48	1345.18	1677.54	1438.1	2030.64	1774.68	1358.96	1599.56	1548.06
PCSM	PC (42:8)	1447.24	1627.96	1460.32	1974.84	1380.2	1613.36	1554.76	1614.7	1705.68	1539.42	1631.4	1594.82	1804.72	2044.12	1410.16	1625.1	1759.48	1586.1	1469.82	2035.46	1871.98	1558.3	1557.96	1596.82	1427.2	1475.52	1431.58	1516.02	1918.04	1460	1365.06	1440.04	1474.82	1564.86	1732.4	1775.1	1524.2	1460.04	1555.7	1785.78	1492.7	1578.58	1580.78	1822.5	2003.12	1650.96	2118.38	1283.94
PCSM	PCo(42:1)	1626.5	1556.62	1376.94	2149.18	1662.56	1592.22	1622.14	1951.68	1702.92	1794.06	1507.36	1655.26	1631.98	1822.34	1714.66	1800.28	1629.84	1819.64	1812.66	2034.06	1674.6	1934.82	1513.26	1504.94	1506.62	1444.84	1516.74	1573.38	1843.12	1497.6	1491.04	1483.62	1420.86	1572.38	1460.04	1662.2	1514.72	1488.26	1519.32	1910.2	1470.18	1456.22	1398.88	1524.96	1481.64	1617.88	2091.22	1467.14
PCSM	PCo(42:3)	1593.98	1661.4	1419.5	1765.1	1468.28	1570.68	1384.48	1757.94	1364.98	1431.56	1594.66	1657.94	1432.52	1786.42	1615.56	1760.32	1570.42	1340.12	1536.9	1570.98	1406.96	1459	1349.64	1581.56	1514.1	1558.72	1495.6	1387.72	1607.56	1440.98	1513.58	1445.58	1422.88	1500.9	1500	1581.22	1339.7	1342.66	1430.96	1611.12	1503.6	1610.04	1424.66	1491.18	1384	1650.86	2041.08	1585.14
PCSM	PC (42:3)	1325.14	1369.78	1366.98	2257.28	1422.84	1470.16	1444.08	1496.02	1480.22	1364.4	1612.24	1361.62	1529.36	1458.44	1417.68	1789.4	1336.88	1471.42	1558.3	1539.04	1565.44	1329.28	1410.9	1381.34	1581.38	1474	1382.48	1281.68	1506.28	1432.8	1397.32	1335.16	1274.88	1485.26	1392	1523.84	1493.86	1569.24	1483.64	2025.36	1575.62	1607.02	1526.06	1472.7	1370.78	1732.38	1692.24	1402.14
PCSM	PC (42:9)	1621.06	1637.78	1418.48	1625.48	1402.72	1408.94	1575.5	1752.46	1527.66	1441.9	1523.84	1701.34	1502.6	1805.34	1626.04	1465.18	1491.56	1514.4	1689.7	1464.22	1639.7	1537.06	1540.8	1645.48	1448.36	1670.06	1442.06	1495.06	1743.48	1559.92	1586.86	1579.64	1377.66	1650.16	1491.94	1458.36	1295.68	1466.1	1502.3	1504.84	1771.88	1342.88	1441.7	1493.52	1488.08	1654.32	1871.34	1473.12
PCSM	PC (42:6)	1904.8	1689.82	1474.28	2472.52	1498.64	1509	1866.7	1657.18	1704.08	1687.06	1903.16	1904	1768.44	1741.44	1714.88	1908.78	1744.3	1851.5	1576.9	1640.22	1772.64	1543.04	1529.32	1618.68	1956.82	1460.48	1564.68	1381.92	1863.76	1629.28	1550.56	1506.18	1537.28	1523.16	1716.08	1738.3	1563.98	1429.1	1530.48	1704.58	1783.32	1363.82	1668.98	1507.46	1398.84	1646.9	2120.14	1591.68
PCSM	PC (42:1)	1681.18	1954	1598.66	2394.46	1476.74	1540.44	1555.82	1790.7	1631.32	1796.72	1626.08	1774.3	1621.8	1423.08	1513.2	1979.64	1790.78	1893.88	2285.46	1521.1	2355.14	1740.32	1716.88	1857.8	1716.96	1680.8	1543.84	1619.3	1855.24	1404.56	1589.22	1376.22	1505.54	1938.16	1813.76	1754.98	1681.02	1614.82	1342.74	1701.88	1529.34	1600.22	1810.54	1731.46	1374.88	2021.1	2275.22	1637.08
PCSM	PCo(42:0)	1801.44	1875.12	1343.08	2253.96	1548.2	1550.72	1650.88	1893.3	1684.76	1866.9	1513.96	1651.96	1527.94	2495.52	1889.28	1592.56	1640.9	1914.12	1856.8	2203.06	1660.08	1689.08	1452.46	1808.54	1697.56	1474.34	1653.82	1802.42	1727.64	1781.66	1663.08	1564.12	1391.58	1775.78	1481.78	1663.58	1565.18	1626.94	1429.86	1906.68	1920.86	1355.72	1779.58	1780.44	1412.4	2028.06	1936.96	1563.54
PCSM	PC (42:2)	1577.24	1956.6	1583.54	2382.66	1316.5	1432.42	1637.36	2122.92	2238.72	1825.66	1650.32	1863.04	1630.18	1555.04	1744.6	1987.1	1714.02	1975.18	1936.92	1645.8	1786.12	1832.82	1428.94	1653.44	1383.22	1558.08	1724.58	1579.4	2084.54	1806.8	1628.94	1691.66	1799.26	1773.42	1553.88	1825.96	1591.02	1353.6	1385.74	1976.04	1691.28	1703.48	1496.96	1486.64	1418.94	1659.12	2039.06	1924.96
PCSM	PCo(42:6)	1901	1907.72	1752.74	1745.34	1559.18	1804.48	1888.44	2327.12	1901.66	1742.8	2058.12	2182.02	1982.8	2134.68	1985.86	1973.8	2016.18	2050.96	2130.36	2376.58	2274.56	2575.74	1971.54	1747.36	1607.84	1839.38	1625.54	2052.54	2495.44	1682.6	1786.82	1593.46	1497.68	2031.24	1976.5	1873.2	1762.48	1581.64	1553.38	2091.28	2365.54	1781.7	1745.84	1657.82	1442.36	1918.74	2685.94	1798.42
PCSM	PC (34:5)	2673.74	1406.02	2659.24	1736.98	3073.34	1396.06	2399.54	1927	2530.02	1522.68	2287.68	1506.06	2315.12	1590.82	2898.38	2391.36	1585.92	3107.86	1542	2676.74	1861.5	1472.3	1578.18	2558.84	1589.44	2751.1	1464.66	2170.06	1983.12	2672.14	1465.72	3088.16	1523.98	2234.42	1488.7	2132.78	1554.4	1362.32	2507.5	1624.94	2939.92	1793.74	2622.16	1527.84	1281.08	1567.4	1416.18	2605.18
PCSM	PC (36:6)	1883.52	1996.68	1579.52	2659.84	1878.28	1882.88	1865.76	2686.1	1839.58	1860.76	1916.86	1991.56	1974.2	2436.64	2503.22	2325.82	1894.26	2250.62	1893.02	2153.64	2092.08	2009.76	1703.4	1855.08	1900.46	1866.48	1930.2	1886.98	3180.16	1939.94	1688.36	2043.02	1761.96	1782.98	1938.56	1890.16	1614.36	1852.46	1862.82	2841.66	1947.66	1803.46	1762.24	1660.28	1761.52	2299.32	2493.36	1986.9
PCSM	PCo(40:3)	1840.66	1901.98	1528.82	2641.96	1788.02	1993.12	1652.7	1805.66	2292.18	1821	1791.7	2058.46	1958.72	2621.36	2137.18	2041.2	1765.96	1833.9	1800.98	2048.06	1799.44	2186.72	1431.38	1865.62	1818.6	1694.2	1691.34	1669.2	2317.22	1875.74	2018.76	1745.66	1760.5	2258.48	1813.18	1715.48	1549	1447.66	1637.16	2386.16	1740.84	1704.68	1836.96	1724.52	1503.42	2597.98	2369.56	1538.5
PCSM	PCo(38:0)	2415.14	2767.94	2166.8	3041.8	1839.98	1949.06	2205.08	2525.2	2434.7	2486.5	2238.16	2191.36	2630.26	3657.38	2668.94	2207.62	2435.5	2619.34	2526.88	3074.58	3212.98	2793.08	2344.58	2716.28	2387.46	2051.72	1912.72	1652.7	3819.52	1979.92	2193.66	1824.9	1878.9	2184.94	2318.28	2399.14	2075.18	1860.48	1915.86	2930.3	2971.22	1955.82	2091.16	2158.44	2191.44	2748.82	3004.78	2146.1
PCSM	PC (40:3)	2238.06	2063.1	1837.7	3009.9	1593.96	2295.2	1792.5	3220.2	2522.56	1919.28	2550.52	2430.86	2219.82	2381.58	2628.52	2613.82	2381.18	2503.2	3008.74	2133.46	2325.02	2494.08	1600.98	1922.06	2003.56	2220.48	1759.82	1880.22	2458.36	2101.84	1676.62	1702.42	1875.68	1924.68	1716.36	2280.66	1756.34	1734.46	2096.28	3061.78	1942.14	1795.64	2297.6	1759.58	1550.52	2292.9	3223.48	2099.54
PCSM	PC (40:10)	2290.76	1915.46	1437.46	2417.7	1328.36	1938.9	1751.18	2113.44	1667.62	1825.1	1858.98	1715.02	1796	2843.94	1888.48	1696.04	1841.06	1480.96	1739.2	1708.28	1786.8	1836.44	1578.74	1818.34	1487.46	1484.2	1559.48	1537.06	2291.14	1780.18	2060.56	1520.08	1748.56	1485.28	1642.28	2149.66	1586.96	1483.28	1663.44	2237.38	2298.8	1445.72	1582.68	1492.38	1358.26	2483.12	2043.24	1877.54
PCSM	PC (40:9)	2077.6	2396.24	1681.44	2997.18	1572.7	1882.32	2208.18	3132.72	1723.02	1511.48	1701.38	2378.26	1845.18	3544.12	2178.04	2162.78	2163.06	2183.32	2508.6	2409.4	2420.52	2381.18	1637.44	2060.86	1930.68	1769.3	2177.32	1466.46	2539.26	2062.14	1908.06	1548.98	1751.02	2001.7	1748.44	1829.66	1740.98	1717.82	1541.9	2332.14	2246.76	2139.08	1883.4	1516.28	1713.12	2050.72	3002.34	1990.52
PCSM	SM (d18:2/20:1)	3639.54	1929.84	3288.54	1941.42	3029.9	1826.18	3353.36	2157.12	3431.68	1639.34	2661.24	1986.08	3063.04	1661.06	2625.94	4417.88	1705.12	4092.64	1527.34	3178.88	1728.92	1790.14	1669.96	3400.4	1686.8	3372.84	1840.12	2810.62	3160.84	4082.98	1925.26	2988	1585.5	3164.9	1779.32	2850.58	1664.9	1709.16	3569.02	2255	3670.74	1848.1	3305.5	1906.24	1783.76	1639.2	2372.14	3219.28
PCSM	PCo(40:5)	2389.06	2167.22	1755.2	3470.76	1706.22	2276.32	1648	3403.64	2546.1	2283.26	1976.82	2249.96	2968.64	3243.12	2547.08	2492.54	2255.74	2296.86	2858.98	2091.54	2281.74	2517.26	1780.58	2512.86	2028.32	1862.1	1662.7	1936.46	3503.26	2724.86	2513.26	1703.48	1682.42	2053.4	2678.44	2689.46	2050.8	2054.84	2335.62	2687.02	2520.02	1904.64	2112.2	2114.06	1974.48	3145.04	3760.5	2358.7
PCSM	PC (38:7)	2274.08	2034.04	1787.44	2551.06	2021.06	1865.2	2083.64	2816.94	2487.92	1751.54	2653.86	1916.66	2000.82	3430.3	2268.7	2227.1	1858.8	2508.02	2042.2	2758.08	2626.84	2334.9	1876.52	1954.32	2287.22	1883.24	2004	1765.04	3658.28	2118.04	1849.56	1781.22	1827.46	1931.94	2186.2	2122.02	1688	1920.62	1670.9	3102.68	2371.92	2240.2	2188.62	1992.12	2084.1	2565.72	3166.52	2196.42
PCSM	SM (d18:0/14:0)	1949.28	2981.96	2161.36	5169.42	2288.56	2170.26	2785.86	3793.68	2637.78	2959.58	2801.74	2345.62	2548.44	4257.2	2888.64	2604.86	3499.08	3499	2583.92	3691.04	3201.7	3092.14	1870.06	2305.12	2637.3	2306.46	2667.24	2246.64	4137.18	2555.14	2330.46	1856.8	2288.26	2836.08	2413.04	2390.44	1916.1	2453.16	2582.34	3763.52	2617.56	2374.42	2755.4	2064.66	2051.08	3060.34	4036.7	3225.92
PCSM	PCo(40:2)	2009.7	2743.12	1710.5	3648.48	1909.18	1940.44	2550.06	3014.86	2071.18	2199.18	1904.04	2105.64	2366.06	3389.76	2973.04	2787.02	2117.18	2461.72	2496.74	2508.82	2684.26	2409.04	2051.76	2224.46	1903.14	1818.5	1752.82	2035.34	2977.84	2283.5	2119.48	1781.62	2062.68	1813.3	1801.88	2000.78	2468.64	1933.9	1854.3	2948.28	1837.88	1809.18	2161.62	1644.74	1469.74	3005.76	2851.58	2266.28
PCSM	PC (34:6)	2564.8	2536.1	1851.62	3849.5	1980.08	1714.98	2873.9	3359.88	2516.06	2570.04	2644.48	1946.78	1948.04	5199.56	3582.86	2607.06	2501.12	3200.52	2878.84	3159.06	2934.24	2346.26	1826.94	2383.44	2544.66	2037.22	2243.6	2082.64	4407.22	2682.1	1946.88	1884.28	1885.92	1629.1	2049.38	2384.06	2030.94	1965.26	2458.8	3113.2	2387.5	2320.66	1918.2	1818.06	1397.02	2769.04	3589.78	2296.46
PCSM	PC (40:2)	2687.16	2826.76	1913.22	5010.3	1817.32	2580.08	2582.66	3130.32	3248.82	2764.02	3554.38	3028.16	2441.5	5426.32	3415.32	3431.06	2440.14	3000.08	2577.74	3816.62	2902.24	2452.92	1605.34	3167.22	2585.24	2294.98	2178.8	2025.78	3221.36	3001.5	2307.7	2167.48	2145.12	2560.5	2466.64	3083.34	2212.4	1872.06	2042.6	2974.2	2999.9	1981.4	2360.54	2038.22	1930.44	2962.26	4020.02	3222.72
PCSM	PCp(42:6)	2625.28	4155.6	2962.02	4075.74	3648.9	2928.44	3284.88	4480.12	3419.58	3427.18	3773.54	3481.66	4319.66	4623.96	3867.58	4067.08	4502.46	3326.46	3622.28	4981.5	4565.16	7680.08	2453.76	3475.96	3128.46	3575.72	2814.06	4158.98	3275.84	3692.66	3861.06	3493.78	3449.78	3662.72	4579.6	3938.52	3536.56	2441.32	3708.26	4146.72	3307.1	2635.36	2952.22	2061.36	2165.48	4384.14	4876.14	3744.84
PCSM	PCo(40:6)	3306.96	3796.44	3180.2	5011.56	3323.86	3086.58	3745.26	5206.68	3501.16	3664.94	2756.14	3974.16	3949.82	4677.4	4090.28	3619.3	3333.58	3890.98	3786.16	3994.64	3592.18	4559.28	2677.38	3350.56	3663.2	2572.56	3499.68	2915.9	4594.9	4161.98	3930.12	3512.12	3120.46	3044.9	3342.44	3852.34	3361.26	2833.24	3595.4	4689.3	4223.8	2450.54	3406.28	2185.84	2027.74	4474.72	5583.1	3859.86
PCSM	PCo(40:4)	2265.6	2145.12	2111.54	3214.08	1515.88	2260.98	1804.18	2983.12	2557.22	1897	2093.26	2374.62	2473.38	3424.86	2953.02	2714.18	2071.16	2442.2	2407.2	2305.32	2072.86	2133.44	1818.54	2410.28	1980.46	1777.16	1512.96	1739.58	3779.74	2794.18	2466.08	2082.34	1852	2128.2	1942.3	2229.48	1907.88	1786.54	2009.68	3111.14	2373.48	2087.88	2012.76	2216.72	1453.22	3049.82	3122.48	2378.14
PCSM	PCo(38:6)	2971.54	2256.86	2330	4526.84	1986.2	2695.06	2151.52	3457.74	3712.44	2173.82	2783.36	2693.46	3494.04	3977.66	3449.5	3976.9	2886.36	3640.02	3958.72	3795.04	3121.7	2833.96	2759.18	3006.86	2118.76	2606.62	2310.9	2134.44	5378.24	3550.9	3257.16	2136.4	2093.86	2305.78	2971.52	3142.38	2082.94	2510.86	1841.44	4064.46	3784.42	2445.8	2312.66	2069.94	1665.66	2951.3	3651.58	2892.46
PCSM	PCo(34:4)	5593.84	1737.26	3440.1	2415.92	5148.16	2126.42	3538.16	2178.84	4822.58	1817.98	4849.28	1756.8	4002.48	2488.64	5041.08	4989.68	2264.1	5752.68	2136.9	3855.68	2049.12	2448.76	1407.5	4002.36	1876.1	3841.98	2044.74	4428.6	2972.82	5896.14	2063.08	4653.96	1609.66	5683.58	2335.74	3981.24	1607.5	1953.52	3705.78	2675.78	4978.74	1821.64	5418.46	2044.42	1811.62	1957.14	2252.52	4470
PCSM	PC (40:0)	2281.9	3753.84	3882.42	4731.02	3259.26	3268.74	3401.1	4473.02	4173.24	4454.64	3914.28	3154.32	4388.38	4834.1	3752.48	4424.06	3869.66	3358.26	3542.18	4436.36	4475.66	8762.14	2376.94	3514.12	3389.08	3622.86	3654.28	3645.72	3769.6	4065.48	3281.24	3377.46	3590.3	4247.32	3137.02	3292.9	3765.94	1925.82	3844.5	4650.08	3649.2	1900.52	3424.5	1798.24	2063.02	4570.24	4871.82	3247.34
PCSM	PC (40:8)	3437.36	3058.24	2198.94	5544.68	2171.42	3467.46	2617.7	4060.56	3251.06	2897.68	2276.74	3584.1	2890.3	3555.22	3193.92	2872.72	2913.64	3451	3429.16	3712.62	3226.22	4102.74	2216.66	2886.78	2649.6	2737.84	2899.54	2550.14	4015.72	2677.34	2954.1	2970.3	2227.48	2166.16	2671.44	2742.26	2598.92	2192.72	1674.22	3487.9	3376.28	2806.76	2899.96	2051.12	2033.74	2795.12	4713.14	2819.24
PCSM	SM (d18:0/26:0)	2530.02	3056.34	2146.66	4226.36	2639.04	2512.68	2983.12	3782.72	2692.36	3769.02	2662.96	3541.7	2564.3	4983.38	3364.78	2983.24	2608.34	3025.46	3020.36	4229.34	2731.26	3652.84	2300.24	2349.8	2556.24	2600.52	2445.08	2318.4	3509.78	2391.98	2295.22	2376.8	2234.12	2626.04	2280.96	2425.76	2118.52	2000.54	2004.12	3809.24	2772.96	1990.84	2325.42	1932.9	1810.86	3101.32	4149.38	3169.88
PCSM	PCo(36:5)	3490.72	2656.12	2397.24	6612.66	1870.34	3065.9	1990.34	4777.6	5749.42	2191.96	3532.52	3497.6	4393.56	3077.58	4243.2	5043.82	4105.22	4193.2	2378	5062.36	3026.6	2820.66	1581.16	2827.7	3132.6	2315.58	2470.34	1917.72	6714.34	2808.04	4134.02	2156.64	2500.96	3270.32	3796	3659.82	2078.12	2781.6	2114.72	6279.06	4815.96	2425.36	2702.7	3276.74	1789.94	2621.14	3752.54	2795.58
PCSM	PCo(40:1)	3299.1	3711.5	2090.26	4993.92	2714.66	3013.72	3827.1	5538.76	3283.14	3012.6	3599.86	3540.8	3265.48	4530.12	3754.24	3267.98	3164.42	4304.66	3873.42	3622.58	3660.44	3625.7	2276.38	2930.64	2845.08	2476.8	2595.46	2921.5	5058.24	3069.5	2539.22	2727.54	2494.72	3241.68	2195.8	3178.2	2591.96	2550.64	2037.64	4261.72	2909.94	2613.5	3145.54	2834.36	1921.74	3040.52	5050.18	3177.14
PCSM	PC (36:5)	2740.82	2152.68	1952.54	3921.22	1725.28	2998.14	1845.48	2750.62	2285.74	2240.96	2140.12	3092.32	3181.2	2531.02	2766.26	2765.66	2050.12	2677.02	2055.56	1841.74	2337.12	3099.72	1457.76	1962.46	2090.28	2059.66	2030.34	1571.3	7870.46	2708.74	2555.08	1851.26	2255.62	2717.7	2204.3	2675.72	1976.44	2369.24	1677.78	3719.84	2512.66	2363.52	3044.42	2117.4	1928.86	2248.1	3265.3	2204.52
PCSM	PCp(40:6)	3792.94	3077.66	2154	5591.82	2740.6	3374.04	3389.96	3900.24	3442.78	2720	3278.9	3482.24	3463.38	4888.9	4166.06	4217.32	2899.06	4360.4	3682.92	5285.02	3188.74	3181.08	3230.62	3239.48	2902	2843.18	2868.24	3552.14	6556.76	3498.42	3055.5	2438.6	2391.2	2835.82	2384.18	3729.8	2368.66	2239.34	2715.06	3803.64	3068.12	2179.7	2789.26	2370.6	1533.28	3674.78	4248.02	3724.86
PCSM	PC (40:4)	3550.12	2869.92	2583.34	7336.92	2331.04	3739.64	2979.28	4770.7	6393.66	3287.24	4322.36	4143.3	5404.16	2550.88	4363.74	5083.14	3363.68	4782.48	4199.84	4150.12	3800.9	3837.02	1894.68	3365.6	2719.6	3265.22	3197.78	2826.08	6056.12	4300.12	3778	2666.5	2618.8	3500.88	4519.22	4515.4	2653.8	2809.54	2803	6305.2	4509.86	3148.3	3904.66	2679.62	2119.12	3121.34	6562.22	3266.88
PCSM	PC (40:5)	4350.18	3519.58	3605.88	8023.66	2444.54	4908.8	3025.38	4986.54	6078.8	3323.02	3700.8	4368.28	7596.62	2448.28	4149.64	6314.58	3952.98	6227.84	5226.12	5533.12	3529.44	3844.1	1820.46	3926.04	3006.26	3171.44	3024.38	3409.66	7945.4	5060.32	4998.88	2644.48	3074.22	3614.78	5000.02	4978.12	2887.66	3665.84	2577.1	6735.4	5535.5	3601.34	4497.5	3814.78	2248.14	3018.26	8758.92	4195.9
PCSM	PC (40:1)	2889.88	3488.54	2240.74	4922.66	2541.64	2544.52	3397.2	4282.04	3764.38	3542.3	3709.72	3316.26	3358.62	5183.5	3322.9	3107.9	3354.86	3598.38	4417.92	4237.48	3790	3755.56	2090.7	2852.58	2746.92	3572.72	2592.76	2976.88	4053.36	3093.4	2627.68	2981.22	2396.6	2893.4	2974.4	3337.98	2295.9	1826.18	1854.34	3736.14	3140.2	2439.4	2942.48	2384.9	1960.04	3326.72	4684.8	3412
PCSM	PCo(32:2)	4104.18	2851.08	2236.38	4404.94	2976.14	3220.46	2926.26	3733.06	3791.08	3245.04	3314.68	3200.5	2634.16	7711.02	3938.56	4936.7	2914.8	3750.8	2890.24	3795.94	3772.74	4278.88	1851.08	3591.66	2714.38	2051	2975.68	2468.64	6700.16	2858.8	2402.72	2559.16	2474.9	3783.76	3014.06	2430.76	2126.94	2010.66	1791.28	4249.94	4121.68	2833.88	2383.02	2371.12	1865.6	3520.08	5343.32	3080.06
PCSM	PC (38:0)	3323.6	3670.2	2182.64	6595.42	2670.24	3087.42	3139.7	4458.74	4564.98	3745.96	4006.38	4095.1	3496.78	5591.56	4130.42	3997.56	3036.88	5110.82	4242.24	5005.64	3970.6	3417.1	2833.52	4216.6	3021.78	3164.7	2781.76	3462.76	7225.46	3838.36	2573.58	2772.64	2814.68	3400.68	2886.64	4122.5	2155.72	2484.08	2989.6	4414.16	3723.76	2313.68	3026.18	2403.18	2040.14	3325.08	4226.38	3870.3
PCSM	SM (d18:1/26:1)17Z))	2796.78	3491.84	1853.8	4211.2	2250.76	2525.78	2882.84	3364.78	2706.64	3416.62	3331.7	3067.98	2496.1	8130.02	4135.16	3235.78	2714.04	4276.14	3176.18	4071.1	3473.6	2515.62	1774.28	2573.6	2478.5	2365.52	1968.58	2256.32	5168.36	2641.7	2367.84	2335.48	1796.02	2345.14	2611.82	2794.9	2010.02	2403.24	1982.26	2918.04	2522.24	2082.72	2535.16	1684.56	1957.3	3523.8	4111.18	3273.72
PCSM	PC (36:7)	3522.44	3618.02	2740.06	5894.72	3465.74	3046.2	4155.94	6099.04	4663.66	3833.44	4827.42	4611.52	3722.98	8139.38	5137.32	4464.8	4310.68	5171.84	4824.78	4748.26	5640.72	5216.58	2826.1	4034.9	4016.38	2806.72	3329.1	3152.06	6590.34	3291.12	3283.3	2934.08	2443.56	3193.92	3478.98	3167.58	2623.52	2241.94	2533.56	4925.7	3129.08	3006.1	3661.46	2170.74	2441.72	4254.46	7006.6	3844.1
PCSM	PC (34:4)	9708.12	2088.04	8057.18	2939.56	7890.24	1859.46	5739.88	2068.28	8841.82	2010.58	8877.36	2110.48	7145.94	2074.2	8247.82	9105.04	2271.62	10637.4	2008.58	7294.54	1804.88	2182.66	2041.28	9597.22	2022.7	11181.5	2379.26	8252.22	3790.16	10566.2	2139.24	9596.88	2286.36	9954	2455.3	8419.22	2133.68	1949.46	8167.6	2417.24	7896.56	1850.4	8457.36	2061.88	1643.22	1977.18	2493.68	7762.66
PCSM	SM (d18:1/18:1)9Z))	3450.74	4287.54	2610.9	6921.24	2842.96	3713.9	3327.16	6113.44	7402.88	4408.54	4813.26	2989.28	5143.52	4995.08	5808.66	5479.98	5842.6	4617.56	3616.44	7366.2	4428.98	4416.4	2006.3	4481.16	4424.08	2875.22	3377.52	3825.26	5680.18	3091.1	4073	2685.2	3256.6	3448.48	7689.64	4192.68	2589.96	3658.98	2866.72	6594.44	3706.32	2958.24	3703.12	3133.76	2170.88	3300.54	6604.48	2732.88
PCSM	PCp(36:5)	2823.48	2865.8	2311.48	5321.02	1957.78	2355.24	2551.46	4085.82	3294.94	2324.92	2569.6	2224.46	3084.1	3823.6	3771.98	3170.86	3161.06	3570.44	4088.8	4876.36	2749.78	3014.72	2205.46	2853.76	2876.64	2149.52	2726.4	2628.82	9907.14	2749.12	2706.24	2026.46	2077.18	2119.8	2882.62	2826.1	2321.64	2340.22	2282.56	4182.06	3490.48	2466.98	2668.12	1953.1	1880.68	2996.86	4238.16	2558.82
PCSM	PC (40:6)	4653.82	6946.9	2793.62	11097.5	4453.5	5362.92	4724.98	6789	5361.74	4524.18	5132.76	5737.14	6946.62	3510.76	6163.12	5647.86	5746.96	5752.94	7282.12	5782.82	5391.08	4779.9	2984.52	4825.1	3859.42	3652.66	3785.1	3471.72	9269.4	5227.7	6193.3	3397.78	3208.22	5205.02	5152.4	5780.58	4705.44	3798.54	3393.8	7025.96	5403.04	4713.98	4898.9	4002.74	2473.22	4252.42	10369	4713.38
PCSM	PC (40:7)	3818.24	5567	2753.1	9014.08	3264.46	4167.04	4604.32	7185.58	3869.8	3927	3681.58	5379.08	4625.2	4226.24	4479.8	4853.78	4811.38	5351.52	5985.7	5804.08	5450.6	4029.2	2546.08	3358.96	3975.6	2955.08	3069.62	2782.6	6202.02	3715.54	3381.6	3516.32	2961.96	4475.34	3094.38	4163.1	2771.02	3640.76	2646.24	7049.26	3653.2	4039.08	4711.96	2943.56	2070.08	4146.1	7588.64	4703.7
PCSM	SM (d18:1/26:0)	3940.7	4630.06	2613.96	6798.14	2914.76	3317.56	4157.76	5654.2	4812.56	5171.04	5563.04	4522.42	3294.98	9860.36	4392.3	3875.8	4952.24	5085.9	4807.9	5750.1	5314.9	5395.34	2303.26	3849.2	3438.96	3000.96	3536.12	3250.6	5888.08	4072.36	3402.5	4383.8	2596.8	3624.6	3370.56	4711.96	3064.42	2210.9	3149.48	4778.32	4217.9	2364.76	3644.6	3106.36	2590.48	4453.42	5724.42	3558.88
PCSM	STD_15:0-18:1(d7) PC	7642.02	1729.94	10346.8	2217.96	8777.18	1986.14	6743.04	2041.24	8637.82	1742.84	8395.04	1852	7497.5	1680.26	8159.26	8840.48	1704.32	11859.6	2122.36	6985.8	1976.06	2008.38	2102.94	8056.92	1588.84	8346.56	1998.58	9946.08	2742.96	9554.16	2069.4	8997.9	1863.58	9031.38	1833.48	7305.9	1845.9	1347.78	6931.96	2200.76	8994.1	1974.88	10384.5	2091.38	1399.92	1537.4	1643.02	8955.86
PCSM	PC (38:9)	3472.76	3361.08	2234.06	5962.9	2323.38	2858.76	2891.44	4447.74	3385.6	3424.4	3656.56	3098.84	3497.42	6848.92	5010.88	4823.6	3611.74	4210.12	3877.56	4549.42	4363.38	4274.36	2238.04	3290.38	2566.24	2874.78	2950.44	2693.76	5831.32	3151	3362.94	2578.58	2928.7	3027.5	3527.78	3352.22	2464.38	2250.06	2078.18	4072.62	3292.36	2527.64	3127.32	2407.18	1984.86	4450.68	5995.94	4110.4
PCSM	PC (38:8)	5598.68	4643.88	2522	7029.3	3532.1	3856.42	5223.24	8347.22	5182.78	3761.94	4271.62	4544.96	4875.02	5756.08	5971	5238.78	4888.22	5309.34	4841.26	6284.64	6303.28	5025.44	3201.32	4543.06	4258.1	3747.16	3170.66	3642.78	7482.88	4055.84	4042.16	2840.1	3299.22	4190.88	3557.4	4757.04	3447.9	2905.42	2573.1	6222.8	5067.06	3317.84	4710.64	2306.24	2708.4	4893.02	7768.16	4115.96
PCSM	PCo(36:0)	4371.88	3999.32	2801.74	5975.86	3691.42	3626	3647.5	6535.64	4685.1	3398.6	4818.46	4374.36	4086.46	10459.9	5278.28	4659.76	5587.38	5503.9	6121.28	5949.02	5966.94	4548.76	2731.38	4948.54	4415.72	2597.34	4210.52	3375.14	8082.22	4641.32	3623.96	3053.26	2694.04	3837.36	3700.76	3505.88	3260.22	2220.48	2414.78	6464.7	4567.38	2769.98	3455.38	2841.1	2221.02	5049.72	5753.32	4475.8
PCSM	PCo(40:0)	4988.14	6437.96	3549.24	8895.32	4694.34	4793.64	4892.28	7909.24	5086.14	4785.62	3878.56	5443.92	5539.1	5395.96	5953.8	4452.54	4412.42	6102.08	7377.9	5576.46	6567.66	5433.84	2866.64	2970.78	3755.5	3277.72	3624.86	2927.48	6836.96	4976.66	4705.28	3489.14	3749.16	4531.78	3585.88	5040.58	3480.04	3403.06	2883.02	7436.4	4465.74	4039.36	4090.1	3261.5	2707	4528.16	7447.98	5067.28
PCSM	PCo(38:3)	3800.5	3756.32	2265.54	7152.04	2519.58	3409.22	2726.64	4944.14	4889.04	2751.02	3555.38	4140.7	4165.1	5698	4792.48	3744.66	4373.5	4213.04	3231.72	3677	3629.66	3604.86	1520.56	3956.68	3162.62	2762.2	2993.76	2520.18	7532.12	3487.34	3348.38	2557.18	2501.22	3279.76	3539.24	3533.62	2401.66	2954.92	2469.98	4347.96	4436.94	2325.22	2923.64	3002.82	2171.52	5548.78	5799.66	3121.3
PCSM	PCo(38:5)	5218.5	4170.88	2930.12	11313.2	3398.38	6345.56	4272.56	7221.96	6733.84	3862.3	5406.9	4519.18	8423.96	4932.88	7177.88	6408.1	6171.62	6034.46	4321.94	5375.8	3080.64	5327.4	1998.98	5021.22	3677.72	2818.38	4022.38	2696.56	10716.8	6996.3	6156.58	3204.62	3787.12	4091.28	5105.02	5248.34	3339.74	4541.38	4096.84	8933.66	6578.24	3255.52	4610.74	4491.26	2904.64	5811.66	7829.9	3764.16
PCSM	PC (30:2)	5385.52	6552.96	3404.34	10027.6	3609.8	4842.8	4636.44	9285.52	7038.76	5477.26	5960.82	5713.62	5843.5	6739.32	8647.76	5875.2	7661.74	7395.18	5443.42	9706.04	7432.9	7285.78	2762.7	5265.5	5769.32	3740.32	4292.14	4812.18	6226.38	3984.94	4515.4	3702.18	3705.4	5100.78	6232.64	4993.22	3539.88	4924.94	4253.86	7715.6	5765.18	3555.64	4866.2	3421.56	2852.44	5186.02	12087.5	4109.1
PCSM	PC (38:6)	8377.06	5772.64	3639.08	10225.5	4465.02	6360.48	4677.3	7958.54	6292.84	3373.6	5141.96	7288.38	6990.84	3967.14	5948.74	5876.8	4845.96	6589.58	5207.66	7034.58	6213	6656.66	2839.58	4366.66	4113.76	4015.9	4043.44	3511.98	13509.2	6065.18	6289.8	4435.22	3967.74	5709.8	4903.84	6727.72	3885.2	4161.78	3229.04	9090.38	6863.6	5890.34	6720.26	5209	2676.74	4588.26	9457.82	4686.9
PCSM	PCo(38:2)	4920.92	4054.76	2424.2	6716.16	2478.32	3489.66	3719.66	4908.16	3869.52	3032.82	4307.22	3303.38	4086.68	5936.26	5225.24	5025.72	4358.9	4154.26	4554.72	4829.78	4821.32	4561.22	2153.74	3985.26	3846.76	3053.92	4283.92	2478.04	6617.2	3692.88	3730.44	2439.08	2983.94	2977.36	3424.94	4157.76	2853.24	2678.22	2567.76	5440.7	4371.08	3012.84	2935.32	2501.68	1987.62	4963.18	6391.08	3644.46
PCSM	SM (d18:0/24:0)	5430.9	7154.26	4256.3	10812.4	4290.84	4682.08	5819.36	7836.52	7208.2	6610.12	5482.44	5294.2	6472.86	10590.4	7580.38	6180.86	5605.64	6645.02	6597.76	9847.44	7985.32	6399.4	3738.7	5584.68	4760.2	4739	5188.54	4877.78	12375.1	4614.66	4533.04	4170.28	3523.9	4388.34	5741.02	5932.5	4241.86	3606.08	4158.68	7880.7	5790.24	3441.18	5171.62	4457.6	2790.96	5987.92	10438.6	5746.64
PCSM	PCo(38:1)	5557.46	5679.9	3691.74	9165.34	4128.14	5165.34	5583.04	8719.12	6748.02	5072.68	4999.04	5786.82	6037.3	7311.84	7241.82	6544.92	7087.06	6924.86	5756.44	8380.94	6763.62	7350.24	4292.48	5446.46	5173.38	4420.78	4949.7	4443.88	10280.1	4521.3	4478.62	3848.12	3883.2	5103.32	4701.44	4968.64	4152.2	3312.48	3117.36	8732.58	6230.84	3905.92	4653.42	3401.34	2855.82	6258.96	9575.42	4975.24
PCSM	PCo(34:3)	5083.02	2534.8	2958.6	6299.52	3200.7	3630.82	3235.28	3732.36	6149.38	2709.9	6087.8	4291.06	3894.26	13067.4	4897.44	6602.78	5421.02	4747.52	2808.3	7425.92	3832.86	4143.26	1587.98	4579.92	3200.08	3058.4	3889.88	2320.24	7833.74	4038.64	4014.6	2873.34	2785.48	4490.64	4463.52	3536.78	1886.9	3492.58	2061.1	6306.4	6249.2	2733.18	3260.86	3699.5	2619.96	2540.36	5541.04	3178.52
PCSM	PC (38:5)	14392.5	10782.4	7015.76	21384.2	6166.16	12141.2	5630.12	14311.9	13704.2	5662.36	8978.62	12482.2	20692.4	4990.48	12208.3	13746.6	9282.44	11482.2	10584.8	11545.5	9949.16	10962.9	2267.08	7625.96	5798.6	6458.52	7200.52	3768.36	24109.3	11604.8	12958	6146.06	6619.38	12410.8	10433.9	13352.1	5666.98	9182.7	5710.82	20284	13345.1	10647.5	10832.7	9914.64	4992.32	8237.22	15299.6	7746.48
PCSM	PCo(36:4)	6020.2	5351.8	4627.22	11908.3	4129.84	7429.84	4789.72	7541.22	9860.02	4857.78	7671.56	4936.14	9716.6	9328.24	9271.34	7812.1	7111.56	6454.52	5604.3	7859.1	5636.1	7884.56	1740.36	6928.46	5013.86	4371.8	4979.52	3881.72	16166.4	6922.8	5966.98	3408.4	4385.64	6025.62	6589.96	5236.08	3586.9	5536.06	4523.2	11183.8	9668.44	4786.18	4224.08	5469.32	2708.58	9441.16	10142.2	5408.52
PCSM	PC (32:2)	4995.18	4169.68	2949.4	7955.66	3361.98	4977.68	3763	6661.22	6296.6	3703.12	4007.92	4871.98	5476.32	6828.24	6634.74	7575.1	5283.52	5158.48	3536.28	6611.14	5413.58	6337.62	1815.7	5003.14	3887.86	4090.42	3887.34	3311	17737.9	3505.3	3554.72	3389.94	3236.16	4777.24	4783.26	4883.96	2911.28	3452.2	2499.74	7822.28	5292.72	3115.12	4453.78	3518.46	2550.18	3488.62	9108.3	3606.22
PCSM	PCo(36:3)	5972.54	5745.12	3154.08	12626.2	4346	5932.72	4000.3	5769.9	6519.12	5272.92	9009.6	4695.4	7168.98	20932.4	8049.08	7454.46	6223.68	4720.4	6451.94	6227.72	4797.48	6715.44	2124.26	5378.48	3770.86	3109.84	4108.54	3346.9	16718.8	7443.56	4681.52	3423.94	3529.06	5326.82	6145.08	5862.96	3369.22	3942.84	3580.3	8961.26	7211	4351.88	6040.06	4381.72	2958.28	7742.68	8252.32	5686.98
PCSM	SM (d16:1/18:1)	8448.5	10747.2	5166.42	17208.6	5565.42	8033.34	7764.48	16387.4	11432.7	10081.4	9546.24	8311.24	9821.3	13033.4	12748.8	12373.9	12504.2	11666.2	7946.7	18875.9	9676.16	14348.4	4499.76	7180.8	10876.4	6126.48	7795.64	8631.74	12843.7	7652.26	8005.16	5918.22	5552.64	7392.1	10595.6	9039.66	5991.9	6084.36	6280.44	14466.6	8542.2	6762.28	8113.84	5444.96	3908.62	9083.14	22317.1	7688.18
PCSM	SM (d18:1/14:0)	9480.74	9979.42	5312.52	16692.1	6579.62	8049.98	9283.68	16143.8	10390.2	8170.16	8100.64	8051.12	9081.3	13641.4	12243.9	10733	11925.1	12273.2	8960.72	15421.5	12217.4	11714.6	3400.44	7257.22	10990.4	6072.7	6742.76	7884.92	12492.3	6563.44	7468.18	5713.24	5494.56	7348.3	7835.18	7717.88	5148.02	6842.8	7173.9	14386	9159.64	6864.46	8432.84	4666.5	4106.02	10575	21150	7978.44
PCSM	SM (d16:1/22:1)	8340.7	6201.12	4913.58	16048.8	4723.9	7486.7	5753.74	9877.82	11400.9	5954.38	7380.78	6109.26	9363.98	6791.44	9433.1	12077.6	9306.4	9877.8	8197.86	10130.6	7276.44	9324.06	2482.96	6515.5	5692.02	6337.22	5553.24	5488.52	25405	7459.28	6766.56	4736.46	5812.1	7193.02	7942.88	7824.16	4435.18	5301.56	3927.46	12364.2	8159.86	6059.68	7638.16	5822.22	3704.88	5106.26	14456.4	6694.16
PCSM	PC (38:1)	11408.8	14553.1	7242.58	23069.9	8171.66	9957.18	11513.2	18848.4	15720.3	10530.6	11228.6	11217	11853.1	18185.8	15074.4	16460.8	13419.2	17279.2	12465.1	20470	15793.3	15169.1	5761.02	12263.2	11798	7401.16	10317.4	12010.5	28869.8	9181.42	9891	8445.94	8094.06	8985.52	10901.8	12603.5	7522.98	6803.02	7957.1	17737.7	13795.5	7033.28	10449.5	6930.1	5307.44	12506.5	22387.2	12783.8
PCSM	PCo(34:0)	9014.08	9921.18	5163.02	17793.4	6722.1	8476.24	9047.34	14707.2	8601.28	8573.44	10259.8	9167.7	7646.6	41302.9	17697.5	11166.6	9837.12	14664	10920.2	13850.1	11130.3	10111.9	4862.5	9502.82	9143.58	6766.96	6875.48	8119.48	23480.5	11085	7048.3	5834.1	6846.28	6611.48	7289.76	8030.64	7586.82	6006.62	8072.46	15391.5	7897.74	5375.64	8790.94	5393.8	4811.84	20480.1	16925.5	13837
PCSM	PCo(38:4)	8196.34	6151.72	3625.36	12115.7	4450.86	6915.64	5199.06	10627.4	8198.5	5446.8	5611.84	6040.18	9138.4	13288.7	11519.1	7039.22	6625.26	7448.04	6623.14	6320.64	6490.3	7886.36	2065.96	7372.04	5499.68	5189.72	4838.44	3419.06	14767	7010.76	5981.98	4423.8	4382.52	5438.7	7333.58	6178.72	4383.3	6214.62	4288.3	11980.4	7520.2	4595.9	5061.86	5023.78	3287.56	14949	10764.5	6049.48
PCSM	PC (34:3)	9251.2	5936.08	5527.16	18773.4	5140.08	8010.8	4760.9	8771.06	11371.7	4691.32	6645.7	6635.82	10788.1	6062.84	9106.92	13624.5	7746.32	8376.88	7561.36	7273.62	6032.06	10373.7	2033.82	6238.88	4471.12	5686.94	6273.98	3177.36	35684.7	7682.08	7395.08	4870.82	6075.14	7567.06	6483.46	8741.78	4743.92	4895.52	2985.2	12051.1	6945.56	7510.3	9096.4	6136.42	4452.32	4366.14	14212.2	6288.78
PCSM	PCp(32:4)	32675.6	2573.66	28356.7	3411.74	28300.3	3190.64	22846.8	3489.94	25119.8	3170.72	25748.7	3231.6	21918.5	2452.9	26267.6	26296.5	2957.5	31754.7	2897.22	23320.7	3326.84	2265.06	3403.96	28657.9	3382.58	31507.4	3535	36353.6	3460.56	39784.6	3410.66	31886.2	2959.6	40863.9	3318.84	22515.2	2559.02	1924.16	23111.2	3029.54	25266.1	2241.84	28613.2	2034.44	1682.52	1793.38	2256.14	23664.6
PCSM	PC (36:0); PCp(38:6)	32271.1	30001	16060.4	54752	20113	28244.1	24702.4	48853.7	38684.4	26369.8	28420.3	32195.9	32341.4	25226.3	35359.1	41991.6	40478.6	47794.1	36599.9	51707.5	43260.8	34477.8	12588.1	25913.3	27940.7	21307	28066.8	18695.9	74021	23058.8	24385.7	20324.5	15978.8	27518.1	29758.6	27678.8	18158.8	16395	13391.4	44573.8	33304.6	20418.9	25723.3	15453	11426	26356.4	53001.2	29029
PCSM	PCo(32:1)	13507.6	17279.3	6281.98	25846.9	10501.4	11929.1	14768.6	27543.9	14875.3	15435.5	14044	16858.7	14462.3	39177.8	20829.1	15777.4	16251.2	20461.8	18586.6	23769.8	23682.9	24940.6	5802.14	13783	16582.9	11051.9	10774.4	13164	31878.9	12020.4	11654.5	8538.84	7192.7	10960.5	10827.8	12185.3	10445	7687.58	8275.54	20838	14428.6	9677.34	11875	7423	5739.32	13558	33113.8	12938
PCSM	PCo(32:0)	12295.3	12357.8	7951.28	25872.3	10455.7	12063.1	14378.8	20061.1	17956.9	13590.9	17740.6	12846.1	11953.2	41231.3	22396.4	19576	15179.7	20448.9	16455.1	28323.8	17987.2	16686.8	5474.54	13915.1	15993.7	11166.4	9125.7	13443.4	43843	16351.8	10701.5	7729.06	8735.62	9986.1	14563.6	10334.2	11237.5	7440.16	10702.6	30504.7	14077.3	9746.6	12248	7042.14	5065.22	17798.6	25891.6	12746.1
PCSM	SM (d18:2/22:1)	16845.8	13375.4	9158.16	29971.4	7032.84	14996.7	6828.84	16935.4	18699	7104.62	12180.8	12922.9	23834.5	6897.5	17334	20131.3	14431.8	16505.6	12549.5	13775.8	12945.1	15509.6	2921.26	10660.5	7411.32	8995.68	10855.6	4845.62	46738.4	13838	14070	7074.34	8758.64	13485.1	11968.2	16872.8	6851.84	9722.1	5557.62	25539.8	15613.1	11641.3	15387.5	10454.3	5973.14	8703.06	24172.9	10927.8
PCSM	STD_d18:1-18:1(d9) SM	36610.2	3206.22	41161.7	3701.7	41272.7	4317.98	33822.8	3191.08	36710.9	3525.56	34054.6	4023.84	40121.1	3689.22	31328.1	36844.8	4887.42	51932.7	3749.84	31233.6	3903.42	2311.12	4586.94	42361	4649.46	42448.5	4826.12	40614.3	4596.34	55465	3845.64	42553.5	4517.46	54401	4449.46	31561.1	3002.8	1942.66	33021.1	4706.34	34529	2804.44	42555.9	2297.76	2109.56	2009.38	2406.78	37365.6
PCSM	PC (38:3)	14034.1	11369.8	8245.52	32711.6	8000.02	14305.8	8973.72	20006	23240.6	12539.2	15392.1	13377.6	19942	12385.8	20580.3	28214.7	16882.1	21052.9	18712.1	22413.9	16534.6	14921.1	3467.5	13970.1	10544.1	10231.2	10734.3	9275.16	32795	12935.1	12306.7	8274.5	9610.9	16401.4	13911.5	19146.3	7585.94	10503.1	7166.18	24920.1	20397.1	8938.48	14281.7	10558.8	5671.26	12341.3	37792.9	13917.6
PCSM	SM (d18:2/24:1)	18802.3	16657.4	11446.6	36071.8	9846.32	22000.6	10827.9	25005.4	27131.9	12130.6	18895.9	16510.8	32368.1	19703	23148.1	30213.7	21211.7	26620.1	19597.6	26282.5	16683.7	17466.7	3963.12	14829.9	13232.6	11640.2	13530.4	10613.5	43416.9	19797.9	20460.8	8858.94	10277.5	16541.2	19521.2	24067.2	10210.5	14158.1	12123.6	32024.3	20899.7	11778	16490.4	11403.2	7512.16	20798	37635.5	11933.4
PCSM	PCo(34:2)	15749.1	12940.5	7671.38	27146.1	9715.24	13141.7	10804.9	17143.7	20934.6	14522.6	22296.5	12067.5	13850.9	58112	25551.5	19845.3	15239.6	17363.3	14001	20502.1	15043	16954.2	4308.6	17787.7	11534.6	10626.3	14087.1	8689.44	42141.9	14079.3	12905.9	9423.9	7747.9	14369.6	12603	11028.8	7879.72	8341.16	7899.48	24805.1	18608	10432.9	10476.4	9222.02	5809.72	19612.6	23177.1	13425.3
PCSM	PC (38:2)	15818.4	19224.3	8908.64	34008.4	11153.8	13942.1	13357.8	27041.8	20559.5	14724.2	13440.5	13602	19208.9	36842.4	31123.7	26711.6	18401.9	27058.4	19868.9	26489.5	19245	17233	6140.46	15349.8	14494.1	10673.7	11465.4	13421.4	30310.3	16757.8	14595.3	9292.34	9449.22	13255.1	15201	18285.9	10458.3	10810.5	11743.6	25955.3	17688.9	11229.4	12878.9	8740.08	7034.04	21460.3	34565.8	19606.4
PCSM	PC (36:4)	34619.9	27394.9	16429.8	59914.7	14517	28968	15287.2	32526.1	39107	14769.8	23628.9	25788.7	48011.9	12970.2	31663.6	44823.7	25114.7	31568.7	28871	26958.5	23708.3	32987.7	4304.02	19943.2	12633	18438.5	20214.5	7372.7	100308	24818.2	28360.3	14346.8	14203.4	27620.5	20628.6	33420.4	14739.5	20019.7	10272.5	48578.9	34232.3	25906.4	31432.7	21657.2	10146.8	18230.1	50140.5	18903.8
PCSM	SM (d18:0/18:0)	13934.5	15714.6	10015.2	41212.2	9310.54	14871.9	13009.1	24801.7	25518.1	14143.7	17068.6	14936.8	17475.4	33681.5	24780	24706.8	21932.1	25367.9	17007.4	24517.6	17717.3	22925.1	4837.14	17422.4	16525.2	12957.7	12807.5	14801.1	80729.4	14868.1	12826.4	8387.76	11545.6	12566.6	15957.9	17064.1	10508.6	11468.4	11152.5	30297.3	18302.2	11823.1	17399.6	8414.96	6438	13118.7	35277.6	15344.2
PCSM	PC (30:0)	20696.8	29754	12689.8	75774.4	17296.8	19589.7	26199.2	40148.5	30996.9	29521.6	26345.6	22127.7	23647.6	69838.2	34961.2	34820.2	27602.2	39207.7	32061.9	46681.9	35514	35939.9	7411.96	21837.2	24138.1	19474.2	24826.4	25001.6	64482.3	22656.4	20443.9	17622.2	15269.4	18618.8	19436.8	31022.1	17037.4	16554.3	23800.2	43940.8	21603.4	16859	22286	15402.3	11841.1	43038.5	51991.8	24363.4
PCSM	SM (d18:1/24:0)	23416	30199.5	12755.6	52479.6	16212.7	21975.7	25245.7	42980.5	32572	24679	22226.7	26622.5	25860.1	44174.7	37323.4	36694.2	28599	38513.4	27537.4	48211.6	32956.4	33567.5	10978.1	27112.7	26372.7	19040.5	17550.5	24218.8	70347.8	20009.7	22125	16422	16823.9	17555.5	22948	27083.8	16269.4	15953.9	15836.7	39538.3	30594.6	14364.1	18451.6	14558.4	9279.56	29620.5	52859.1	24604.6
PCSM	PC (38:4)	29274.8	21540.1	16664.5	52347.8	12547.1	31484.5	12311	36673.7	41504.8	15097.7	28208.4	28736.4	52134.8	10346.5	30598.4	41706.4	26853.5	36020.4	28244.7	31590	24804.2	24838.9	4196.46	18447.9	14060	16386.3	16142.3	11205	64115	24358.3	31798.5	12399.6	15154.8	25010	26754.7	35118.8	13519.8	18573.6	10908.9	50696.6	35399.5	17828.8	25049.4	15825.9	8988.44	17495.8	53567.7	16568.9
PCSM	SM (d18:1/18:0)	25437.7	30790.1	16586.4	68745.3	19465.1	31219.5	22697.6	53231.2	43889.1	24851.2	29072	25167.9	35807.9	36645.4	46527.7	55728.2	40177.9	49446.6	33181	69474.1	36107.1	39539.1	7398.66	27898.7	38828.1	22657.1	20849.1	35917.7	58867.2	28510.1	27444.1	14734.6	23914.7	21669.2	42062.3	32868.3	20837.5	21885.9	23764.6	68076.8	38293.9	17939.4	27680.7	12702.5	9776.52	22479.3	86797.1	24447.3
PCSM	SM (d16:1/24:1)	35845.7	32392.8	15165.7	77400.4	17580.6	28513.8	18320.7	37349.7	39144.6	20509.4	24712.5	28135.1	43572.5	17362.5	33409	51765.4	33773.7	35210.8	37509.8	33155.5	29418.1	38495.4	6349.1	26180.9	14711.1	20478.3	24335.2	10628.1	56049.5	27139.4	29728.2	18577.7	18216.8	33182.3	25188	31515.6	14438.4	21785.9	10963.3	43116.1	32125.9	27069.7	30041.6	20667.7	11329.1	18569.8	65989.5	28184.6
PCSM	PC (36:8)	18311	18816.5	8164.66	29916.5	16798.1	12813	15146.3	31180.1	16127	16358.4	15697.8	21538.5	18805.8	38206.9	25050.4	18650.5	17679.1	22141.2	24126.4	17866.8	30946	24174.7	7855.66	19052.8	15566	12115.9	15547.9	9528.82	35151	13126.7	13373.6	11249.6	9191.58	14696.6	13045.4	12720.9	10257.1	5527.82	6196.18	22046.3	14105.9	13111.1	14190.7	9731.14	7501.14	21368.6	33472.1	18584.3
PCSM	PCo(36:1)	21402.1	21534.5	9414.9	35238.5	18463	15144.5	17258.8	33819.6	17806.8	17834.5	16804.7	24050	18774.5	44162.5	28465.7	21390.7	20980.7	22689.3	29137.1	22135	33070	28109	9275.1	22726	18553.3	14643.5	16833.8	10057.9	38883	16354.5	14840.1	13128.2	10081.4	17004.6	15292.2	15705	11657.8	6743.64	7170.66	27743.8	17821.5	13148.4	16686.3	9823.18	7635.5	27033.4	39374.3	22493.5
PCSM	SM (d18:1/24:1)15Z))	27156.1	33785	14260.9	62524.2	17972.9	24449.8	24567.1	43898.7	34964.6	22208.3	24218.1	22085.1	34583.8	85280.8	59041.5	42387.7	30138.1	43233.7	30022.5	50619.1	35906	31601.6	10247.9	28900.8	29786.6	16247.5	19307.9	24654	63920.9	31940	25451.2	15670.4	17734.4	21185.6	31531.6	30942.3	17667	19264.5	23681.6	50532.3	27148.5	16655.7	21256.3	14009.3	13291	48904.7	62723.6	33891.7
PCSM	PCo(34:1)	27449.7	22870	13891.4	62242.2	20218.5	25860	24565.2	42057.4	34931.2	27173.7	37089.9	27178.8	30198.6	117042	45251.5	33996.6	28617.5	38148.5	32684.9	38535.3	34689.9	32254.5	6783.52	26397	26067.8	19110	20866	21894	68249.3	29807.9	21013.5	16557.2	16543.2	21768.7	24690.1	22672.6	17471	14743.6	20745.6	48473.4	28452	17267.4	22263.3	12963.3	11299.2	29479.2	48803.8	28747.2
PCSM	PCo(36:2)	21010.7	18300.2	7187.5	35376.3	12456.2	15322.4	13335.1	23208.4	16805.6	13152.9	14772	15834.1	15749.1	66750.3	29954.2	18227	17417.3	18384.3	21128.4	15757.3	22348.3	23418.2	6346.78	18367.5	11383.4	12923.2	14452.3	7662.66	41644.4	17806.3	12899.5	11683.3	9469.06	15912.3	12117.7	13720.2	9391.66	8556.32	7373.2	21625.1	14880.3	10773.9	13800.7	10464.7	8579.1	36622.1	30240.6	21558.7
PCSM	SM (d18:0/22:0)	67928.1	65908.1	31513.5	122701	40259.7	59344	48096	107495	92077.7	56721.1	59799.3	69915.1	72366	49631.4	76705.7	92046.7	84388.5	115124	79923.9	113061	97582.5	76506.9	21768.7	60236.6	59765.5	45031	56713.9	38767.6	167725	46316.6	51976.5	41719.2	33723.3	56661	63186.6	62804.8	34507.7	34689.7	23565.8	100969	79695.9	45644.6	52348.6	34074.1	23754.4	55825.8	125912	62316.8
PCSM	PC (34:0)	31204.8	30052.9	17698.9	82413.2	23330.6	32384.8	28278.8	51965.8	45762.7	26749.5	32460.3	30641.4	39662.9	43563	52272.5	48372.7	37993.8	53283.8	43776.4	57543.6	38340.1	37763.6	10114	30376.6	31484.4	24989.3	22687.5	26052	165309	33628.7	26658.1	17715.1	22622.3	24331.9	32893.6	34408.2	20358.6	21815.4	20858.8	68851.7	38018.5	23405.3	32202.1	17410.6	11490.8	24390.3	71064.2	28418.6
PCSM	PC (36:3)	82921.4	67649.4	30905.6	174835	31204.3	59020.9	35505.3	83705.1	87601.8	37575.4	42240.1	57559.8	90992.4	31741.5	66768.6	102666	63772.7	75583.9	80075.9	61329.1	59584	70578.3	11481.1	50137.4	23288	37205.8	46720.3	17041.2	129369	56279.1	57755	39644	36257.5	66668.2	51288	62951.3	27754.5	44960.9	17476.7	90864.7	68097.7	56685.9	63080.5	42250.7	22581.5	35922.1	137871	54032.3
PCSM	PC (32:1)	37888.2	36367.5	23976	95021.1	22665.3	36322.7	29843.5	59805.9	66019.2	32722.1	41480.9	32311.8	45695.3	72640.3	61906.2	69189.6	47506	60453.7	42052.1	69886.8	41381.3	58690.1	9175.18	39102.1	41236.4	31490.4	28658.4	33123.9	193405	38222.6	32141.5	19804.4	27171.6	31069.1	44635.1	40961.8	25185.6	23413.4	25333.3	75418	43624.5	26678.4	41772.4	21908.4	13292.4	26819	94176.8	33265.7
PCSM	PC (32:0)	47091.5	41704.3	33559.3	131400	34678.8	52690.9	55290.7	94816.9	87551.1	39116.8	53083.8	44294	63673.4	97536.4	102113	92813.2	59316.2	101242	68027.2	127135	64315.9	64069.8	14276.4	55362.3	61208.2	42151.7	34359.8	63012.8	311671	61999.3	43135.9	27441.9	33855.1	36748.3	55391.3	55993.5	36842.2	39726.2	56286.8	145804	61177.6	37894.5	53933.6	28462.8	16334.2	50057.2	116709	43818.6
PCSM	SM (d16:1/24:0)	115692	103256	48349.3	227627	59791.9	102336	71438.4	155400	151296	75804.5	88418.3	96293.1	131435	77505.4	120525	169613	125370	151819	124377	163669	130743	117602	22930	90124.2	70656.5	73612.1	82506.9	51786	249093	80994.6	84418.9	63441.1	56543.7	101518	89337	105709	53255	61135.1	34911	161121	134727	73252	88191.5	57960.7	35472.1	70079.3	225075	94920.3
PCSM	SM (d18:0/16:0)	71588.4	109842	37695.3	243393	52311.8	60623.6	75472.9	134431	93245.5	103784	82875.2	77638.5	81013	195862	113336	86761.1	92098	124121	112583	147117	110353	117061	20550	76076.4	87321.2	54310.9	75804.3	72415.7	143603	69670.5	68754.9	53519.1	44161.8	59646.3	63060.5	92424.7	46612.4	56218.5	63377.2	120250	65276.4	48256.5	63068.2	46230.6	33877.1	137025	189966	77439.9
PCSM	SM (d18:1/20:0)	78847.9	64574.2	34851.6	169793	43949	69939.3	50193	107335	114810	51657.4	66007	62575.1	90412.5	70229.9	104539	127925	84548	108458	83333.4	116093	82368	97068.3	14375.3	66348.7	54740.5	55130.5	58825.6	41826.9	272382	61056	59503.4	41075	50749.2	70858.1	64343.7	75862.2	40084.3	47321.5	28225.5	139904	93219.1	56409.2	74017.7	44168	23351.1	42632.8	172514	68696.1
PCSM	SM (d18:0/20:0)	104776	94327.2	57426.3	249504	64718.8	102808	78528.5	175585	165741	84706.1	101648	95630.1	134128	137598	181107	169623	126872	180403	158478	181649	137123	127221	23642	103084	102774	77532.3	80595.2	72195	362727	102680	86352.6	56360.3	68662.7	84633.9	101264	109882	58152	66085.6	52385.5	206529	125417	71759.7	104840	54871.7	37986.9	66113.3	240815	103047
PCSM	PC (30:1)	168514	244221	99904.6	392691	109047	156039	175368	370692	221426	181114	162464	188414	201362	252972	269266	233030	228655	291009	229164	386197	263497	263453	47729.5	154982	225896	129052	134589	172933	267790	158685	151945	108293	87195.6	137105	177640	181470	108759	130243	117117	295458	195223	103198	128149	89418.7	58739.2	211682	501612	159190
PCSM	PC (36:1)	166530	160182	71729.7	289760	92270.7	151974	108656	251816	214194	129985	142850	170385	179033	117806	179242	223810	206709	262593	185070	263914	229538	180060	43128.2	144313	135575	108331	136769	88737.2	385185	112695	124673	96393.5	81522.9	139084	151825	149774	81966.5	85077	51518.8	249492	194601	105718	124031	78937.6	51690.4	123016	307251	148304
PCSM	PC (34:2)	156699	125578	68260.8	329268	79846.6	140702	93129.6	194925	228506	94823.8	124301	109178	174214	123055	191400	244999	156914	195554	171638	205484	149668	192931	22151.1	121471	88090.9	106615	116188	60447.4	594963	112877	111356	83275.2	85621.8	135236	111301	143743	70329.2	87113.7	44739.2	239280	167512	114539	144160	89977.6	44853.8	80147.5	325683	133004
PCSM	PC (36:2)	226796	195326	88885.1	448618	103923	184193	122387	276263	285830	135186	156456	175547	248836	118543	208314	325948	229415	278171	226473	282846	225688	222673	38483.8	164544	105438	142291	155555	77524.8	425752	149909	166425	117437	102697	200187	173238	200448	90335.8	112902	51031.8	286989	234060	146803	169201	116622	64250.1	124838	423075	176665
PCSM	PC (34:1)	288152	250660	149916	675549	177755	267793	211371	475044	450786	217338	261598	260375	353841	349928	474341	446472	334416	470953	408430	469718	359082	349362	58303.9	265496	271030	197915	214025	192854	974085	257897	220460	145134	173679	218754	272022	282346	151639	176593	133691	554317	330695	190260	264674	136380	90977.9	167200	636755	284821
PCSM	SM (d18:1/16:0)	516447	740968	294218	1.17949e+06	346379	460295	527289	1.1104e+06	681168	556797	491772	581635	610177	771782	824359	714924	690386	861953	710431	1.15013e+06	797667	811624	146134	472966	683153	392864	418166	526790	820001	475705	458289	327131	269633	413354	524767	545457	332996	395905	340760	895242	590518	310543	398072	269060	180953	629230	1.47605e+06	500637
[truncated: 15 more columns]

## Sheet: Supplemental Table 2
Supplemental Table 2. Absolute Intensity for Free Fatty Acids
		HF																												IF
Method	Lipid name	3041	3044	3045	3046	3047	3050	3051	3052	3053	3055	3056	3057	3058	3059	3060	3061	3062	3063	3064	3065	3068	3070	3071	3072	3075	3076	3078	3081	3123	3124	3127	3128	3129	3130	3131	3132	3133	3134	3136	3137	3138	3139	3140	3141	3142	3143	3144	3145
FFA	C18:4	20481.6	17262.5	17484.9	17800.7	16253.7	14568.6	20075.8	22018	19811.6	20008.3	20989.6	20169.3	21315.3	19040.1	18831.7	18648.5	17460.6	14309.6	14681.5	18591.8	18988.7	18997.1	20293.2	18462.4	19096.9	20158.4	19262.7	15619.7	16104.1	15483.6	15987.2	16524	14822.4	3050	20443.8	17800.6	18348.8	18491.5	20454.6	19037.4	18779.2	20320.2	18911.3	18931.5	20224.1	19713.2	19644.9	19121.7
FFA	C34:0	33658.5	33429.7	26916.5	28552.1	27602.9	26836.5	35665.8	36071.4	35410.2	35899.1	35692.8	35762.1	35441.6	35492.3	33078.9	34991.3	36638.5	24660.6	29066.6	36927.8	33611.3	34267.6	32388.1	33329.8	33155.8	33492.6	34940.5	34626.5	29441.4	25450.6	27523.1	27612.8	26890.1	4579.32	35222.5	31549.4	26724.3	35678.6	34667.5	33482.8	24553.8	33673.7	25312.4	25661.9	33684.8	36090.7	30206.4	33674.6
FFA	C12:0	40356.9	34681.3	31646	35793.6	32160.3	37517.5	41467.9	43365.9	38879	43045.8	44568.4	42285.4	44343	37175.6	43350.3	38715.8	42856.5	29074.4	31623.6	37750	40957.2	42956.2	36830.4	39911.3	39926.4	41301.1	39854.1	26838.4	33039.6	32406.7	31643.4	34530.3	34245.8	6326	43833.4	46037.4	56536.4	37371.3	41469.3	41924.1	58695.3	40999.4	56191	59650.8	37903.6	42674.8	36942.7	39637.9
FFA	C32:0	53617.1	52887.6	46255.5	52488.1	47817.8	45144.3	59427.7	65162	58048.7	58564.1	60605.1	56661	58021.3	62522.9	58788.8	55719.7	60727.7	43440.1	51541.1	61763.9	56900.7	62924.4	54604.9	56369.7	50972.3	51931.2	53914.9	44452.7	43657.4	42939	44540.8	44651.7	43925.3	6982	55094.5	56965.8	48378.3	56263.7	57690.9	54450.8	46893.4	51636.6	42588.7	43886.1	62742.7	78346.7	53814	52869.9
FFA	C15:0	116638	125996	105011	95062	101740	96183.6	129025	127649	125370	136990	130178	127966	133559	121358	122084	116758	121747	80844.1	102779	127613	117169	111163	117203	121278	116050	129665	125383	82000.8	97470.4	96077.4	103406	100670	113916	12652.1	124922	128166	129279	113427	120451	116222	135094	119510	126221	136778	127484	118352	123367	125031
FFA	C30:0	44989.7	44186.2	38896.5	41927.2	40113.1	39044.3	57409.9	57764	51575.8	56626.4	52454.9	53418.9	48985.7	54237.9	48865.9	48517.2	52668.8	36933.9	41576.5	63662	47624.9	54182.4	45733.4	51327.6	46617.2	44194.5	55143.9	36705.7	37731.5	39609	38073.3	37942.4	36410.4	5720.66	50383.2	48247.7	49809.3	58530.7	51121.3	45959.7	48748.1	44097.9	43536.3	44748.6	61064.6	60001.9	44325	45439.9
FFA	C14:1	141357	238874	136048	93248.8	108203	111078	96866.8	103645	97642.2	109767	107829	103116	116457	99704.6	104351	98575.5	98912.7	70833.4	109372	111705	94026.6	97032.5	100514	93962.7	96552.1	103455	91718.5	74355.1	108571	104967	129305	115410	180873	9327.66	106189	129489	112208	88129.8	106156	103151	108472	103632	102839	105523	94400.4	105121	116790	99310.6
FFA	C24:5	59669.6	75034.2	63761.1	56790.7	78331	60781.7	95857.3	119974	74045.9	108900	81009.5	74720.3	76619.5	105270	82052.7	74759.7	68013.7	54408.8	63556.4	113271	77673.4	67097.5	73385.8	82817.5	67220.3	75275.6	88192.4	68541.5	54787.3	64604	52710.3	54546.4	52614.2	7590.6	69266.8	50195.1	118787	74097.3	71636	65522.8	49501.2	67887.4	53550.6	56457.2	96034	71862.2	70136.7	72285.1
FFA	C28:0	77864.3	58208.2	64243.8	55165.1	63402.7	75842.7	76450.6	82588.7	91049.1	78970.7	105625	72866.3	75053.9	68063.9	80098.8	79875.2	93873.3	71859.1	58099.3	140255	78854.8	116446	95686	108863	86280.8	85851.5	108977	69334.6	55939.6	64591	58405.4	49697.1	69910.3	8171.08	65906.3	85596.4	74415.2	79727.3	95134.8	88927.6	72655.4	91982.6	63599.6	71182.9	91440.2	156901	80037.8	80445.5
FFA	C17:0	98518.1	101730	101439	107461	101922	88545.3	126942	128344	124062	142329	135506	128521	124924	143301	121991	120301	126246	84607	102889	158976	125799	115674	113002	131467	111773	120947	144407	207230	85044.3	97345.2	93935.1	96499.1	90907.2	10571.6	117664	120881	117611	175709	116546	110632	113534	110573	111432	113870	154866	128748	114004	122838
FFA	C14:0	107616	105754	104738	107734	107507	100686	146596	142514	126841	150271	139693	138210	137902	142430	132216	137812	134707	84379.2	113259	198829	130207	128777	118902	131171	130127	134380	142112	268423	99479.8	104868	103207	110385	103996	13783.2	136925	144879	138038	193654	129376	124362	141513	131413	124526	139085	157233	134302	120144	126961
FFA	C22:4	59379.6	83402	64240.9	97694.9	83680.3	76267.4	111222	122861	104441	104921	97836.1	91697.9	83445.9	144919	108454	85285.3	81229.5	102439	103158	131887	98352.7	82742.5	94798.4	105530	80467.2	84693.6	145624	141820	86279	71793.6	56783.6	60714.7	58502.2	10216.5	80394.3	95103	74498.3	127969	109781	75374.7	66172.1	67470.2	58447.5	62302.1	111279	110756	81251.5	86209.9
FFA	C22:0	118936	191776	172195	138735	189192	150983	323667	178085	191553	249819	194710	168455	173436	327094	196446	179994	178036	154633	155864	353016	188195	162562	178845	223757	157696	191376	250753	297992	120759	133005	122516	157973	106589	11922.6	147312	139339	154163	247083	172552	136445	116477	165239	102168	141828	265563	183132	175111	172205
FFA	C20:0	119671	232101	188689	146692	252607	174653	267071	221327	209672	441735	252347	151135	199693	473508	224604	159290	172811	152914	148167	267422	233857	175982	211568	261026	153578	190009	231922	211226	134429	164436	141050	178689	119079	20349.2	150831	144123	152291	224286	173983	129281	126509	180352	110153	130385	280009	192479	209979	178696
FFA	C15:1	383383	553361	391930	358684	333968	349897	361423	439058	394855	422587	406717	386637	447423	382117	412497	359982	375293	240711	377898	396068	362373	488196	341600	342426	333827	367462	335675	218087	347571	336520	366870	346208	439780	19605.8	455047	666935	560020	479026	386698	379248	640150	377514	544827	575960	495722	534228	398977	352934
FFA	C26:0	112991	135444	112806	139267	128305	113412	147721	160376	138724	147105	142191	134576	140032	156691	142638	136478	148001	93240.8	120990	166000	128041	226668	131060	141159	126550	125647	160300	128095	107443	114105	119751	112766	107222	9112.86	144283	197631	234619	261979	138088	126801	213999	127471	210204	193892	254530	243729	128639	122013
FFA	C22:5	66285.2	129688	67824.9	89062.2	113337	95252.8	97284.2	129068	94527.5	160695	112828	87326.8	86536.9	181500	124227	86546.2	79668.2	85868.4	92353.1	143737	134061	122561	96983.6	110219	82829.6	77433.7	113409	165176	87719.8	77663.8	55260.7	64026.1	55993	7501.56	91324.1	87722.4	64830.2	124589	100703	76814.5	60541.8	77987.9	54676.2	56341.2	142507	127795	86749.6	82901.8
FFA	C22:1	37979.1	44964.5	41548.7	36696.9	45319.7	38504.7	65073.5	77658.7	50731.3	68158.4	51097.5	48976.9	45911.2	88840.9	55647.1	56249.5	48995.8	47716.2	47538.4	95152.1	52197.5	40630.2	50481.2	65541.1	44946.3	53308.7	81175.7	97749.6	37965.6	40731.1	36977.7	39285.9	35585.9	4793.08	43627.5	33353.4	76241.5	86228	56106.2	40795.6	37108.5	43006.8	37531.4	39414.4	68492.5	47890.7	50900.8	45278.3
FFA	C12:1	74042.8	58434.8	69391.4	67390.5	68542.8	64246	75649.6	85514.7	80248	85207.2	84769.5	77534.6	83014.9	70747.9	82753.2	75643.5	74166.7	45370.6	68485.4	69119.2	74718.8	85232.6	72259.5	70264.3	70832.2	75170	66590.8	41295.9	66106.7	67289.9	69467.6	69015.3	70166.6	3852.58	84580.1	110758	124752	78546.3	75855.5	80689.9	129947	78266	126338	130584	81104.6	80846.6	68218	68990.7
FFA	C24:6	73318.2	180481	80440.2	70426.2	138242	92638	189401	112595	93816.4	264600	134326	147120	84227.8	199166	99766	89842.7	91644.1	86530.9	66680.6	251763	116430	95235.5	90976.7	139548	78061	88772.7	153886	85650.8	64118.4	78672.4	62126.5	59535.6	57679.2	9225.12	76768	64153.3	69069.6	121345	102100	76869.3	59111.9	77507.8	60520	63606.1	320686	107817	77576	79714.1
FFA	C20:5	56430.8	55313.3	45162.5	55886.1	54964.9	48591.3	55593.1	61258.4	55738.5	62677.2	65650.4	60189.9	64323	61172.9	59680.3	56494.6	61227.7	40176.7	48536.5	62142.4	61635.9	63448.1	52200.5	56679.9	52913.9	49446	57471.5	203133	47414.8	48019.9	51029.6	51450.1	51436.4	4930.5	59914.4	57464.3	43063.1	98318	60506.6	56357.8	37858.4	57600.4	36635.8	36501.8	76211.9	70753.1	54867.6	57022.8
FFA	C20:1	46499.6	58005.6	52378.6	44873.8	77107.8	46249.1	73259.3	117083	59862.5	120053	71371.6	69858.6	51373.5	127410	68226.6	57647.7	54965.9	57901.4	52654.2	101692	72142.5	51304	62988.2	78813.6	56667.5	66471.4	75981.9	121037	46375.4	62056.9	43980.4	48734.9	42415.3	3373.92	52384	50343	148859	143142	65230.6	43659.6	75107.4	48326.9	70765.1	76552	112223	70744.7	59760.1	55079.8
FFA	C24:1	61911.4	109506	67736.1	62885.2	78736.6	61057.4	171854	87688.1	79150.9	128604	84935.2	108957	72079.6	141661	91381	95819.3	74257.7	69170.1	73492.3	186806	88033	82675.8	74844	105607	66578.4	73326.2	143096	174458	61748	66281.2	59160.7	56343.7	55841.3	7310.94	66755.6	68673.8	94722.9	178379	86887	62334.1	70741.3	68682.9	67686.7	73253	154355	91837.9	74999.9	73954.3
FFA	C17:1	89991.3	77607.5	87424	99353.9	86001.5	84289	100456	124091	116313	119171	115844	108735	116431	109709	116282	100851	101567	66851.2	98515.4	97703.4	106902	123941	93089.3	95235.8	96600.1	103589	97315.7	91593.5	83746.3	86478.5	84880.8	88104.4	86038.1	4442.98	119837	151543	136158	119631	105165	103116	142571	100995	133522	136576	119574	140315	95231.2	102128
FFA	C24:0	129305	208685	132328	127117	147784	129906	303026	168716	176823	273253	174270	204174	145922	282337	194859	215105	162869	167780	155537	503478	188692	175270	160161	240314	154264	162663	394429	364546	121373	130145	123529	121313	108594	13758.8	131963	130550	154458	275434	177349	146600	113598	133231	106098	130292	290777	196266	164479	153199
FFA	C22:6	103534	370823	95483.6	102230	287168	297378	150879	240037	123930	454535	229516	101568	105105	373293	223687	85987.8	89986.2	88900.3	89867.7	162895	293737	254101	146524	153339	81539.3	89478.4	107963	114288	115725	120189	82669.3	76233.1	75252.9	9281.84	129129	114523	71095.7	127778	124272	84011.3	91127	144279	65948.4	58639.9	318713	152665	94559	85053.2
FFA	C19:0	258677	351534	302516	274125	268519	231942	353778	338809	318618	362800	310196	330509	292981	338305	312851	302605	318959	207483	302972	519022	327037	353859	313988	382999	281446	286344	366343	1.11387e+06	231335	246804	245372	239337	282884	17571.8	270752	247032	310447	1.17636e+06	318014	269880	279043	275341	255068	267261	575786	407205	316823	332564
FFA	C18:0	555784	1.01662e+06	813306	956554	979014	711779	1.58622e+06	965211	1.01456e+06	1.59457e+06	1.04951e+06	1.17072e+06	925304	1.63616e+06	1.06028e+06	1.08526e+06	1.07839e+06	901813	890747	3.03799e+06	1.07873e+06	903051	1.0021e+06	1.6704e+06	862917	900774	2.07362e+06	1.93472e+06	780820	812385	770237	795454	647088	25108.8	868779	764663	730443	2.40453e+06	1.08309e+06	802260	587650	867012	522516	643881	1.9635e+06	1.15738e+06	948706	1.00533e+06
FFA	C20:3	24543.7	33487.1	30871.9	49318.4	37319.7	29827.4	51123.4	48295.7	55915.4	39776.8	44398.6	39772.3	36436.5	77588	55720.8	47210.8	41644.6	52307.3	43568.7	91501.6	47722.6	34102.3	42162.1	54579.6	40223.7	34171.2	78779.6	195260	37137.4	31611.3	25396.3	29843.4	28013.5	2939.46	38979	37141.8	29267.4	65059.3	59883	40180.3	27914.1	28093.8	22958.4	26188.9	50831.8	62906.9	32245	39509.4
FFA	C26:1	172945	229235	169998	244250	200095	164574	213450	248908	225430	223323	216161	208871	207649	243913	222899	208913	231365	136078	192884	249644	192480	456986	186877	206860	195399	194085	229021	211323	161161	180345	180804	178505	184099	5751.42	246741	389351	519851	513954	220624	199854	482613	198342	472313	400178	474395	486086	174652	188109
FFA	C18:3	37598.6	25267.9	43601.8	61795.6	48299.5	32814.1	34796	96256.4	145587	54286.3	68159.3	73016.7	84707.5	110106	97699.2	100048	48097.9	84562.5	46683	48390.6	102367	74719.7	282145	149003	91885.3	256604	60276	108757	35404.5	35588	45701.1	39158.5	33838.4	2978.84	75755.4	42489.3	30656	42055	73998.6	77092.4	38654.9	105430	32782.7	53301.5	175204	109382	98111.9	49543
FFA	C16:0	439479	871015	765204	797765	758204	606328	1.51094e+06	834517	901561	1.27665e+06	913178	1.20713e+06	746600	1.28695e+06	817907	1.0628e+06	874818	713215	774729	3.83816e+06	903346	779519	877473	1.32031e+06	785643	824450	1.90069e+06	5.97241e+06	622447	678476	633173	695432	577751	27736.5	737713	683444	709417	2.94699e+06	922896	671014	593313	741856	495942	622515	1.76909e+06	910528	737350	811815
FFA	C20:4	98939.8	183116	169397	255398	187858	165983	287395	324055	329753	193395	232543	234051	215476	458945	365176	273876	233438	386701	254290	681346	287049	150944	181429	428501	195015	155834	540981	738106	209223	191279	92659.4	120745	109237	4730.96	216830	187943	139137	297717	353831	202127	73481.9	120431	61895.5	86793.9	275128	397758	146909	234677
FFA	C16:1	155694	144724	165215	196268	169544	155000	230481	246717	225702	226925	226107	217295	219297	258596	239642	212207	216865	141711	199819	229469	214151	250094	184315	206583	189658	201739	214716	1.35572e+06	170930	175094	173147	171911	159109	7132.64	241651	307047	242715	353992	209306	184318	268857	184358	234159	253544	268057	276647	188660	203955
FFA	C18:2	118637	181248	175236	316596	227563	158236	382301	337875	378516	282074	263338	220472	262603	578159	365310	333363	319843	386232	301212	595721	339413	214389	298082	370140	287210	331577	460450	1.2172e+06	201882	218753	158104	153673	160301	5451.56	227535	224023	160893	332949	402092	229765	139560	176571	97971.4	159405	352061	399053	242572	278085
FFA	C18:1	188514	302640	287645	433773	372105	235368	636940	495898	525940	510290	388989	378030	367880	948199	591470	482426	473807	522435	541436	945647	589597	296555	475930	616474	420752	524751	734527	6.16856e+06	325529	344654	262249	250608	214647	17686	325331	341364	332458	1.4573e+06	667194	297256	250961	257645	170695	310480	735927	576133	427953	425732
[truncated: 15 more columns]

## Sheet: Supplemental Table 3
Supplemental Table 3. Absolute Intensity for Method 1 (Harlow et al., 2019)
			HF																												IF
Method	Lipid name	MRM	3041	3044	3045	3046	3047	3050	3051	3052	3053	3055	3056	3057	3058	3059	3060	3061	3062	3063	3064	3065	3068	3070	3071	3072	3075	3076	3078	3081	3123	3124	3127	3128	3129	3130	3131	3132	3133	3134	3136	3137	3138	3139	3140	3141	3142	3143	3144
1	(5Z,8Z)-tetradecadienoylcarnitine	368.3 -> 85.1	3930.92	3845.46	4018	4220.1	3587.84	3293.52	3864.2	5208.7	4059	4044.02	4447.16	4125.54	4687.88	4877.08	4608.74	4599.48	4898.34	4225.86	4467.28	4957.54	3946.64	4219.12	4308.72	4073.54	4141.82	4265.46	3665.56	4713.2	3483.76	3424	3302.66	3598.94	3872.04	4135.12	4672.42	4455.72	3644.9	4643.74	4164.96	4394.02	4377.28	4358.42	4573.08	3361.34	3891.74	3113.4	3695.92
1	cis-5-Tetradecenoylcarnitine	370.3 -> 85.1	3441.24	2768.14	3225.7	3232.76	3266.08	3529.56	3510.62	4033.98	3937.82	4096.2	3305.28	4133.88	4448.88	4679.14	3847.5	3925.58	3556.38	3603.1	3765.7	4008.72	3618.3	3452.32	3196.66	3830.18	3884.88	3404.14	3359.64	10970.8	3171.96	3148.58	2833.12	2610.66	3198.9	3691.02	3692.82	3098.08	3204.32	3940.74	4780.9	3423.86	2579.36	4019.64	2762.7	2990.22	3606.58	3142.92	3567.08
1	O-(11-carboxyundecanoyl)carnitine	374.2 -> 85.1	4259.38	4531.72	4144.7	5173.08	4481.1	4937	6137.74	5988.78	4969.66	5251.02	6404.12	5212.7	4747.68	6446.5	5614.66	5847.98	5145.42	5631.46	5490.74	5377.12	5810.1	5647.28	5094.16	5794.76	5987.86	4980.74	5330.26	6068.8	5067.84	4444.04	5201.88	4597.52	4477.26	6910.4	5332.02	5168.46	3998.64	6152.14	6060.46	5904.78	5309.7	5623.52	3961.34	4654.92	5498.88	4376.52	4562.42
1	2-Hydroxymyristoylcarnitine, 3-hydroxytetradecanoylcarnitine	388.3 -> 85.1	4074.76	4490.74	4054.68	4091.52	4432.58	4049.12	4962	4934.44	5214.32	6106.66	5024.88	4264.66	4702.04	5301.64	4572.4	4773.82	5266.56	4803.46	4536.2	4839.78	4628.24	4557.12	4585.72	4454.28	4427.52	4272.6	4396.16	5378.42	4267.02	4231.8	3678.02	4445.58	3487.76	4891.12	4576.2	4409.64	4181.28	5601.36	4448.66	4805.74	4584.18	4567.36	2960.88	4033.78	5035.62	4116.92	4345.4
1	(7Z,10Z)-hexadecadienoylcarnitine	396.3 -> 85.1	6114.26	6567.94	5055.72	6054.1	5523.18	5230.54	5622.68	9058.94	6141.2	7295.44	6783.98	6837.2	7519.74	6750.24	5788.16	6573.18	7107.34	7571.98	6429.46	7168.08	6887.76	7237.06	6215.2	6843.64	6417.24	5735.34	6196.16	7844.96	4805.84	5411.94	5634.54	5500.74	4715.36	7073.28	6263.9	7433.1	6490.08	7046.16	6980.84	7098.98	7076.56	7398.46	6129.54	6227.46	6365.64	5912.46	5771.2
1	O-palmitoleoylcarnitine, trans-Hexadec-2-enoyl carnitine	398.3 -> 85.1	4120.16	4243.64	3499.46	3930.16	3488.16	3764.58	5457.94	5316.48	4488.18	4916.36	4252.66	4059.9	5160.12	5206.16	5150.4	4547.6	4495.58	5827.46	4241.08	5212.68	4337.9	4148.46	3448.82	4756.72	4164.94	3782.06	3966.22	24971.6	3544.66	3868.62	3631.28	4146.28	4120.64	7211.34	4828.54	3470.62	3850.76	5623.02	4876.44	4921.46	3674.82	3249.42	3302.1	3406.4	4526.16	3801.04	4316.22
1	Palmitoylcarnitine, (5Z)-13-carboxytridec-5-enoylcarnitine	400.3 -> 85.1	14259.1	15077.8	7361.64	9903	8102.8	10889.1	16499.3	12809.1	19170.4	8166.66	10363.5	19488.6	16338.8	15578.1	11958.6	18997.5	8325.16	32328.1	7849.98	41060.6	10324.6	13232.7	5902.24	9135.96	10164.9	6009.64	11409.8	35268.4	11643.1	10255.1	7526.56	9492.16	14619.2	28571.4	14398.5	5318.06	3144.12	14078.2	22838.3	22506.3	8403.38	12306.2	4996.42	3840.52	8180.16	5504.88	6276.9
1		402.3 -> 340.292	2740.26	2975.1	2838.62	3870.68	3739.84	2987.88	4510.38	5369.42	4498.64	4518.8	4609.12	2717.76	6005.2	3173.6	4840.36	3899.3	3616.32	3363.18	2971.62	4812.34	4077.44	2845.64	3529.1	3513.48	4087.38	3580.4	4874.52	3419.88	2331.36	2783.36	2601.16	3080.84	2775.4	4137.58	2424.56	2170.62	2207.1	3147.94	2947.34	3858.58	3044.88	3975.2	2248.22	2171.28	3605.12	3154.74	3256.02
1	O-(13-carboxytridecanoyl)carnitine	402.3 -> 85.1	4585.6	3893.62	3756.38	4038.76	4436.48	4355.48	5395.74	5487.56	5117.36	5512.76	4715.34	4906.6	5246.9	4456.54	4642.34	4742.18	5511.26	4825.66	4690.78	6048.14	4879.22	4849.7	4858.8	4822.58	5058.26	4862.38	4906.86	5017.58	4157.06	4087.56	4058.54	4489.78	4069.84	5165.48	5186.36	4348.32	3824.04	4603.5	5239.72	5034.54	4477.22	5005.9	3436.38	5691.9	4698.78	4853.8	4743.74
1	3-hydroxypalmitoleoylcarnitine, Heptadecanoyl carnitine	414.3 -> 85.1	4323.5	3914	3608.66	3309.02	3029.6	3840.18	4713.04	3820.3	4098.26	4351.42	4570.08	4561.68	5075.48	5319.54	3759.26	3898.94	4123.04	5601.34	3904.86	4895.08	4455.24	4393.36	4535.4	3746.12	3332.72	3514.74	4149.38	5460.42	3087.02	2577.32	3834.42	4037.58	3341.4	4680.36	3978.66	3861.2	2726.34	4732.44	4465.06	5235.18	2951.24	3899.44	2920.28	2853.08	3759.06	3813.52	4158.5
1	Stearidonyl carnitine	420.3 -> 85.1	6497.04	7323.4	7173.42	7190.52	7501.16	6880.16	8789.2	8511.42	6717.7	9004.64	8191.06	7579.94	9269.68	7853.48	8385.3	6623.58	8635.96	8980.42	7269.2	8161.12	8016.42	8067.9	8575.14	8370.9	8222	7447.84	7694.1	7704.36	6614.96	6872.78	6209.08	7379.8	5960.24	7311.88	8024.28	8212.02	5896.08	8010.34	8313.42	8587.9	7282	7979.64	5905.12	7059.64	9283.76	6915.2	7167.58
1	Linoelaidyl carnitine, O-linoleoylcarnitine, 9,12-Hexadecadienylcarnitine	424.3 -> 85.1	7398.3	5480.82	5826.92	6527.34	5707.38	5565.68	7512.6	8322.66	9044.9	7300.34	8917.76	7538.1	7504.54	7257.78	6579.38	6787.56	7959.04	9870.68	5813.12	9268.54	7581.9	6814	6023.7	6810.88	6925.96	8186.84	6306.76	13347.3	5783.48	6120.32	5629.26	6267.8	6291.22	7932.22	7116.7	7238.16	5901.94	7563.2	8163.88	7663.12	7317.02	6934.86	6297	5875.1	6176.16	5632.74	6361.02
1	O-oleoylcarnitine, Elaidic carnitine	426.4 -> 85.1	7440.92	8177.3	6680.2	7130.02	6982.46	6531.26	8212.7	10581.5	12325.4	7761.4	8312.38	11216	9805.88	12296.1	9313.34	9491.3	9265	16669.4	7653.42	12296.2	9630.68	7756.18	6576.96	8055.64	7576.92	7867.12	7294.26	32346.1	6624.34	6126.16	6180.94	8402.48	6661.56	11512.2	8104.32	5941.94	6206.5	12479.7	11871	9686.12	6700.68	7892.84	4946.5	6279.02	7508.88	5654.08	7690.06
1	Stearoylcarnitine, hexadecanedioic acid mono-L-carnitine ester	428.4 -> 85.1	7889.9	11591.2	6194.26	6420.16	8112.24	9382.38	12740.6	11842.1	12221	14027.1	9990.68	10169.4	8825.62	21647.4	10545.9	8586.16	8127.42	15068.9	8839.32	21091.3	11443.8	6954.82	7922.4	12470.2	7935.92	9511.54	12704.1	13173.9	8205.62	8054.9	10005.4	17284.9	9657.48	14014.5	12567.8	4562.44	3234.68	10486.7	9869.42	7741.78	4484.68	6880.96	4249.34	4868.42	10633.5	5311.28	11203.7
1	(9Z,12Z,15Z)-3-hydroxyoctadecatrienoylcarnitine	438.3 -> 85.1	6314.16	6671.32	5825	6757.42	5626.66	5686.5	7893.32	8879.06	7464.16	8773.48	7802.24	8053.14	8137.76	9064.6	8177.5	7817	8633.08	6653.24	7727.56	8103.3	8415.26	7795.28	7738.14	7547.32	7489.02	7466.84	7688.06	6880.6	5866.66	5924.78	5842.12	6140.8	5931	8168.96	8430.86	8623.96	7016.32	8331.78	7495.58	7408.08	7950.4	7153.34	7554.76	7322.16	6750.84	5395.8	8007.24
1	3-hydroxylinoleoylcarnitine,	440.3 -> 85.1	4539.72	4904.48	3604.82	4735.22	4409.28	4612.56	6092.04	7289.78	4818.92	6375.62	5960.22	5473.1	7045.72	6539.2	6625.04	5862.38	6345.5	6611.7	5169.44	6052.16	5698.98	5249.28	5186.52	5577.62	5433.82	4463.32	5612.46	4936.32	4896	4383.76	4732.06	4777.1	4000.44	6521.86	6172.38	6297.34	4805.34	6071.92	5565.26	5211.52	5225.74	4746.32	5051.26	5076.1	5936.4	4281.34	4987.7
1	12-Hydroxy-12-octadecanoylcarnitine, 3-hydroxyoctadecanoylcarnitine	444.4 -> 85.1	3314.82	3832.38	2933.58	3440.98	3356.74	3155.2	4455.68	4689.56	4122.84	3804.36	4502.88	4702.36	3759.8	4405	3938.02	4465.8	3974.16	4357.02	4313.54	5456.88	4550.06	7812.68	3555.52	3542.96	3954.6	4587.7	4610.04	4752.56	3106.8	2467.3	2792.42	2853.7	2982.58	4585.26	3873.98	3472.02	2915.04	3857.08	3865.3	3588.7	3672.8	4134.72	3248.88	3048.3	4249.18	3471.22	3715.38
1	O-arachidonoylcarnitine	448.3 -> 85.1	5208.18	5239.72	4522.3	6042.38	4960	4732.14	5833.14	5308.44	5685.2	5882.58	5951.18	6428.3	5875.98	5972.38	6062.54	5924.52	6694.62	6084.62	5136.66	6211.5	5718.98	5800.68	5461.18	6215.9	6144.18	5346.9	6387.96	5705.24	5320.38	4755.84	4891.4	5705.74	4939.32	6351.16	6495.84	6212.88	4919.64	7080.36	6169.04	5226.9	6497.02	5739.8	4798.42	5155.16	6008.38	4188.68	5148.78
1	(11Z,14Z)-eicosadienoylcarnitine	452.4 -> 85.1	8623.48	9684.78	8387.96	8781.74	9289.4	8750.96	11112.5	12094.5	11901.7	12383.4	11696.9	11858.3	12748.4	13532.4	11978.1	11187.7	11821.5	11937.4	10740.4	11615	12000.5	11933.1	10260.7	10644.3	11722.5	10842.1	10412.4	11023.1	7963.88	8170.92	8633.08	10281.7	7408.54	12266.1	10888	13346.6	11472.3	11659	11993.7	12617.2	12343.7	10682.4	11238	9656.4	12123.2	8924.82	10434.4
1	PE (16:0)	454.2929 -> 313.2929	2456.14	5071.6	2891.42	4788.96	2667.86	2420.9	4211.9	6187.82	4934.44	4534.78	5495.22	4559.4	2648.2	5203.26	5075.22	3244.72	4678.46	6923.92	6364.72	9768.86	5511.6	3200.44	4206.1	6919.6	3697.56	3605.34	6138.52	5530.68	3453.94	2901.9	2432.14	2894.76	1921.24	3712.68	3728.08	2784.44	2946	3492.02	5128.44	2878.12	2239.32	2287.62	1427.8	1460.12	5627.96	4186.34	4193.58
1	(11Z)-eicoseneoylcarnitine	454.4 -> 85.1	5357.78	6836.82	4728.3	6297	5343.78	5612.36	6170.28	7455.12	7221.76	7274.68	6802.5	7251.16	7453.56	7379.12	7440.98	6720.66	6909.42	6961.34	6605.18	7562.9	6889.14	6477.78	6177.08	6387.44	7828.72	6916.18	6807.18	6687.7	5034.14	4906.86	4203.52	5396.4	4849.58	6780.1	6292.68	6517.46	5824.72	6963.7	7410.52	6718.42	6492.12	6116.3	5515.32	5653.68	6420.48	5483.74	6316.68
1	Arachidyl carnitine, O-[(9Z)-17-carboxyheptadec-9-enoyl]carnitine	456.4 -> 85.1	3740.24	3796.72	3327	3247.84	3343.74	3943.44	4367.3	4186.16	4261.8	5182.46	4472.78	4366.2	4037.74	6115.54	4836.9	4027.6	4921.26	5103.78	3664.22	5218.12	4078.5	4119.62	3542.88	4562.64	4230.86	3904.68	4442.4	4345.08	3214.3	3463.72	2957.24	4474.3	3508.6	4675.44	4541.28	4672.16	3226.02	4513.56	4838.6	3865.66	3486.18	4071.28	2966.64	4168.16	3730.84	3498.3	4054.02
1	O-(17-carboxyheptadecanoyl)carnitine	458.3 -> 85.1	3107.42	4126.64	3997.96	3365.28	3571.08	3225.72	3751.48	4463.6	4016.62	3706.44	3817	3576.02	4187.68	4230.12	3900.76	4708.1	4368.82	4864.86	3520.78	4621.42	4414.92	4938.72	4115.16	3392.38	4260.38	3706.28	4001.84	4058	3546.76	2433.06	3675.62	3661.54	3093.02	4738.12	3774.42	3954.88	3564.22	3947.02	4876.02	4387.9	3156.34	3726.56	3086.84	2886.98	4286.26	5429.64	4662.92
1	3-hydroxyarachidonoylcarnitine	464.3 -> 85.1	5137.18	5195.28	4388.16	5016.92	4336.9	4429.88	4895.76	6360.52	5212.04	6227.08	6102.96	5870.68	6319.26	6340.14	5570.78	5406.12	6006.62	6763.7	5313.96	6175.52	5799.38	5114.54	5420.34	5292.16	5002.5	4795.96	5338.96	4999.92	4087.26	3835.86	3616.56	4731.26	3932.94	6047.32	5862.38	4837.64	5016.72	5318.28	5825.76	5656.16	5659.02	5004.2	4357.04	5278.58	5655.8	4391.38	5073.12
1	Lyso_PS(14:1)	468.2284 -> 283.2284	7776.6	8499.3	8362.8	12039.8	9472.38	7426.34	9981.36	13516.6	12078.1	10700.3	11925.9	10033.5	11833.9	10577.4	9923.72	9671.86	13038.7	12215.7	9320.88	10532.3	13358.7	10354.6	11899.5	11569.8	11507.6	10380.7	12123.2	7686.36	7955.22	8150.12	7046.3	8148.22	9121.32	13414.4	8531.5	5508.48	5786.4	10852	10756.9	11658.3	6901.5	11530	5087.16	5480.92	10128.5	8490	11792
1	Lyso_PG(14:1)	472.2332 -> 283.2332	1362.66	1236.08	1453.16	1187.08	1120.9	1123.3	1216.06	1241.84	1146.28	1316.52	1132.76	1240.08	1298.76	1299.36	1440.1	1326.92	1274.84	1445.82	1183.38	1226.28	1261.86	1189.2	1492.24	1284.52	1319.42	1282.74	1571.96	1632.88	1346.06	1189.28	1166.26	1290.1	1156	1149.6	1404.52	1359.08	1276.36	1366.88	1184.76	1313.48	1502.78	1293.08	1147.82	1150.16	1288.58	1232.78	1210.32
1	Docosa-4,7,10,13,16-pentaenoyl carnitine, Clupanodonyl carnitine	474.4 -> 85.1	3267.64	3177.7	2691.3	3502.52	3050.24	3036.08	3271.14	4184.64	3808.18	3536.46	3377.92	3690.66	3643.14	3839.7	3948.3	3695.84	3146.12	4026.38	3520.56	4318.68	3286.84	2720.12	2847.76	3792.84	3366.12	3383.4	3802.92	3353.64	3203.06	2587.6	3045.62	2766.38	2502.68	4075.76	3678.46	3320.46	2735.76	3326.9	3152.54	3152.28	2707.16	4094.06	2572.44	2893.66	3814.94	2591.6	3340.08
1	(7Z,10Z,13Z,16Z)-docosatetraenoylcarnitine	476.4 -> 85.1	4540.52	4130.16	4631.36	4640.54	3673.88	4752.08	4646.84	5605.6	5172.86	5195.64	5193.52	4244.64	5439	5253.08	5884.44	4659.5	5754.32	4989.66	5550.28	5536.02	5064.12	5158.9	5559.74	5059.7	5528.18	5445.54	4784.56	3792.1	4219.94	4346.56	4579.5	4586.12	4090.66	4999.24	5363.7	4405.38	3750.14	5964.66	5468.7	5491.76	4826.9	5199.58	3887.72	4220.9	5019.62	4247.08	5103.38
1	PE (18:1)	480.3086 -> 339.3086	24483.8	30960.4	17469.3	33987.8	21547.5	22971.6	23513	34199.3	24797.4	20882.6	26253.4	23631.6	15218.4	16274.8	25881.4	17227.1	22370.2	28581.3	33810.4	22506.9	28275.7	14442.2	21952.2	21550.2	15321	18541.6	8113.9	25647.9	18675.7	15703	18909.7	12120.3	20188.1	22214	19661.4	10037.1	9579.62	7226.92	22503.7	18142.5	6660.24	14445.3	3892	4616.16	17913.9	17106.4	19292.4
1	(13Z,16Z)-docosadienoylcarnitine	480.4 -> 85.1	4815.64	4665.8	3996.94	4928.06	4742.52	4954.38	5543.96	5312.22	5725.96	6055.9	4937.82	5053.92	5242.36	5805.34	5561.98	5189.6	4972.2	6103.24	4103.82	5937.8	5443.16	5455.18	4608.86	5146.14	4706.9	4948.76	5312.54	4715.2	3741.74	4030.76	4374.14	5021.82	4508.7	5587.38	5394.22	5154.94	4887.24	5561.18	5261.44	5611.38	5147.82	4933.22	5020.34	4729.94	5815.48	5631.02	5914.92
1	PE (18:0)	482.3242 -> 341.3242	10547	28375.6	17041.8	23803.6	19275.8	14013.2	30357.1	37250.6	24438.1	28628.6	18867.5	19507.3	10910.4	22252.9	28088.3	16446.7	20945.5	39271.2	25622.7	56631	27741.6	13898	20375	37102.4	21393.2	21221.7	34783	8561.34	15482.9	14165.7	13054.2	9910.98	8764.76	16657.8	15400.7	10716.5	12057.1	14032.9	25992.1	13930.8	9217.48	9613.5	5261.64	4421.74	24012.3	15849	15256.7
1	O-behenoylcarnitine	484.4 -> 85.1	4611.06	3812.94	3560.2	4534.52	3689.3	3265.06	3991.22	5931.38	4759.12	5789.32	5768.64	5616.54	5979.42	6047.28	5283.04	4143.04	4954.76	4078.46	4697.74	5753.28	4740.72	4505.82	5062.52	4248.3	4815.44	4884.04	4140.84	4733.12	3714.92	3135.04	3010.78	3308.12	3190.46	4785.86	4267.74	4515.1	4166.94	4651.52	5135.5	4113.88	4272.98	4702.76	3949.4	4326.7	4703.14	3207.54	4207.76
1	Lyso_PC(16:1)	494.3168 -> 184.1	2405.3	4180.58	5647.84	6142.04	4049.82	3757.66	5477.04	7962	5938.72	4728.6	5233.3	3650.04	4541.08	9183.2	8817	3930.62	6124.28	11660.3	6151.9	5981.72	4870.74	3873.28	6286.78	5030.46	4380.92	3901.98	2443.14	21478.5	3600.1	4483.52	2397.08	3566.34	3073.24	5346.68	4335.76	2825.94	3077.5	2152.46	6356.18	4874.82	1985.16	3607.52	1485.56	1543.9	2868.98	5548.58	4726.36
1	Lyso_PC(16:0)	496.3325 -> 184.1	21851.3	50526.2	60594.8	53629.4	48957	35764.1	99940.8	116804	117481	81275	73329.6	38240.9	34877.6	167689	118172	53228.1	82411.7	193273	101389	322429	75899.4	43190.3	76327.2	172411	59860.5	58638.2	111445	103544	45408.9	49124.8	22778.9	36504.2	25432.3	95955.2	49303.3	27197.4	33316.8	54518.7	111269	46242.1	16345.5	25484.4	7049.44	8511.96	43672.1	61043.7	51669.3
1	PE (20:1)	508.3399 -> 367.3399	4884.66	2261.74	1764.84	2397.2	1788.58	1633.98	1947.9	2454.32	2166.7	1995.84	1838.9	1657.4	1698.36	1641.38	1837.96	1769.16	2212.54	2271.34	2080.62	1948.64	1930.3	1858.98	2254.98	1735.52	1638.48	1709.24	1668.34	1688.76	1665.38	1744.2	1329.84	1521.96	1640.06	2099.92	1489.88	1734.7	1738.22	1171.46	2536.32	1829.02	2400.52	1657.08	2419.36	1611.36	1491.94	2295.56	1785.12
1	PSo (18:0)	512.3348 -> 327.3348	10707.1	12471.6	12280.6	15901.9	12851.7	10572	13742.3	16455.8	16270.7	16627.7	17278.5	14075.9	16990.4	15746.7	17121.7	13675.4	19546.5	16326.4	15198.2	16017.2	19939.7	14926.2	17047.7	17101.8	14235.7	13132.2	17060.7	13137.2	11223.7	11886.7	11577.3	11226.6	11497.1	18566.5	10740.1	7824.28	10541.8	16332.8	14935.1	17132	9986.92	16054	6869.14	8888.02	16900.8	12976	18016.5
1	PGo (18:0)	516.3396 -> 327.3396	1300.96	1210.56	1675.14	1238.8	2446.86	1610.72	1757.3	4424	1589.04	1596.26	1886.36	4071.62	2217.98	3362.96	1652.54	1575.04	2888.28	1190.14	1367.76	1607.7	1558.22	1497.2	1613.04	1457.42	2003.04	2163.86	1707.28	1561.6	1311.38	1628.6	1799.66	2223.82	1427.12	1469	1580.18	1544.52	1289.26	1383.24	1625.8	1698.74	1313.58	1570.74	1514.58	1302.28	1516.46	1489.24	1398.1
1	Lyso_PC(18:2)	520.3325 -> 184.1	20712.3	22956.3	14987.5	24583.4	16204.8	17330.8	16759.4	28127.7	30147.1	20619.5	24408.4	18738.2	17448.2	23114.8	24487	20127.6	22545.7	40002.3	25712.4	27533.5	21779	14519.2	23524.8	17682.6	17364.7	19024.4	7316.2	230815	14198.5	16829.2	11001.6	10997.2	17735.2	18608.8	18726.9	7993.4	7727.62	5673.88	26641.8	22025	4862.18	13939.4	4773.38	2987.32	14750.3	22017.1	20100.9
1	Lyso_PC(18:1)	522.3481 -> 184.1	32671.1	50263.7	50434.3	62365.7	41089.3	31190.7	55734.9	103442	82861.5	66419.4	57917.3	39681.9	37636.4	84827.2	93751.6	49580.2	72044.3	143963	95885.8	111526	69730.5	35527.9	63979.4	76004.3	44065.7	49270.8	30598.1	377088	39947.9	44866.7	22665.6	28746.3	29347.7	69137.4	45030.1	25987.8	27075.2	20376.2	75293.7	46471.6	11595.7	27405.8	5830.96	7145.76	37194.7	56964.4	57814.3
1	Lyso_PC(18:0)	524.3638 -> 184.1	20232.3	53608.9	58503.1	51025.1	41804.1	33967.3	89534.7	113445	110135	85889.3	74640.7	45387.7	31074.5	96417.4	83265.7	56682.9	81611.4	193373	79413.1	336831	78979	41832.5	75674.5	163295	63689.5	61177	147787	38764	41058.9	57886.8	26611.9	32984	24495.4	98402.1	49111.7	26100.2	30487.3	49838.8	100672	48300.4	17215.2	22268.9	8662.96	8515.56	52975.7	48721.4	45606.4
1		531.5 -> 271.292	1961.32	1334.48	2079.46	1476.7	1681.2	1599.64	1755.74	1793.98	2503.36	1909.8	1527.12	1947.78	1996.7	1959.12	1894.98	1756.28	1819.7	2306.88	1729	2050.44	1964.18	2521	1928.58	1675.8	1949.06	2379.56	2061.94	2042.32	1930	1893.78	2226.52	1800.8	2112.08	1948.9	2155.88	2251.62	2178.74	2426.08	1984.8	2307.76	1766.08	2099.56	1756.32	1931.58	1541.46	2204.22	1855.08
1	Cer(d18:1/16:0)	538.5 -> 264.3	24428.9	37336.7	22201	47019.2	27580.6	23678.5	33558.5	40127.6	35280.9	43210.8	56657.7	37022.4	29055.4	152799	77793.2	32582	26905.8	67609.5	33872.9	49726	47831.9	18087.2	25732.1	46558.1	27734	25256.4	31753.7	132583	43204.4	27682.3	15737	20772.5	18924.8	28948.9	20439.8	12159.8	25929.1	101580	39659.4	21942.6	14692.4	21947	14111.9	12827	66015.9	15367.6	41739.8
1	Cer(d18:0/16:0)	540.5 -> 266.4	2104.7	1859.04	1834.44	2148.62	1976.3	1602.92	2200.18	2964.28	2091.86	2491.14	2430.72	2045.1	1950.42	5157.38	3052.98	2144.16	2112.62	2430.98	2172.8	2940.78	2766.72	1554.14	1553.96	2008.22	2141.5	1991.62	2538.5	7613.14	2844.34	1601.1	1374.84	1512.78	1299.86	1857.52	1662.98	1332.72	1738.48	5291.02	2452.9	1698.98	1302.9	1590.3	1850.22	1663.76	2392.92	1505.52	2259.44
1	Hexacosanoyl carnitine	540.5 -> 85.1	3447.1	3331.54	3648.98	3718.16	3112.64	3521.06	3785.22	4486.04	4238.06	4563.68	4823.58	3823.14	5064.7	5104.1	3929.24	4108.66	4233.8	5242.14	3898.96	4162.56	4444.38	4517.46	4503.94	5242.7	3948.24	4473.72	3662.42	5109.3	2828.64	2741.02	3291.34	3345.7	3105.98	4912.74	4045.8	4502.84	4083.7	5254.36	4369.52	3568.4	4313.26	4456.72	4010.36	3404.44	4182.7	2835.46	4172.16
1	Lyso_PC(20:4)	544.3325 -> 184.1	5645.94	4853.5	3457.46	6421.32	4396.12	7137.72	3701.1	7520.4	7036.82	4989.14	7244.74	6376.5	5425.42	3865.7	5307.64	5532.86	5770.32	8479.74	5268.86	8137.4	6154.24	3327.66	5119.18	6431.98	3644.44	4618.68	1882.62	82304	4293.06	4867.16	2484.12	3765.68	3897.38	5232.94	5786.7	2673.54	2169.06	2464.5	8062.84	7787.98	1552.06	3858.52	2049.46	1723.46	4919.26	3738.56	4364.08
1	Lyso_PG(20:5)	548.2645 -> 359.2645	1249.14	1605.16	1251.8	1142.04	1351.56	1268.82	1550.94	1333.3	1178.5	1504.2	1153.88	1371.56	1725.5	1302.48	1341.04	1273.54	1514.56	1707.46	1388.36	1298.32	1274.28	1342.4	1161.88	1107	1499.64	1175.22	1330.56	1281.6	1618.14	1290.54	1404.32	1492.6	1670.14	1442.66	1287.64	1260.7	1218.5	1789.26	1331.82	1734.78	1450.2	1559.02	1257.38	1213.64	1409.52	1464.92	1548.84
1	Cer(d18:1/18:0)	566.6 -> 264.3	2551.22	4519.34	3579	5008.36	3698.68	2771.22	3142.34	3896.36	3176.86	4154.74	3179.58	8238.22	2772.66	19918.1	5919.58	3887.84	4007.32	10161.3	3233.46	5353.24	4404.16	2023.84	2325.1	4437.68	3263.54	2437.52	3400.98	14463.2	3818.9	2808.24	1962.74	2331.58	2078.22	3870.16	2219.54	1571.24	3841.54	16401.8	5478.42	2427.36	1815.58	2324.12	2054.2	1852.22	4579.16	2150.7	3596.32
1	PG (20:0)	572.3294 -> 383.3294	1461.94	1256.3	1633.06	1466.06	1631.52	1379.38	1432.4	2296.9	1287.1	1739.96	1684.18	2376.02	2326.16	1887.6	1827.16	1442.16	2313.52	1580.88	1794.72	1618.3	1434.7	1742.02	1673.98	1494.2	1491.58	2279.6	1526.08	1412.12	1415.1	1350.76	1265.62	1941.48	1490.08	1465.38	1257.64	1525.22	1471.44	1683.36	1521.48	1372.06	1429.3	1704.4	1341.9	1437.3	1739.64	1313.56	1778.34
1	Cer(d18:1/20:0)	594.6 -> 264.3	3029.92	3484.36	4221.2	3329.16	3907.88	2752.32	2957.62	3873.1	4028.8	4162.2	3953.3	3010.64	2862.34	13328.1	15389.2	5116.36	3479.48	5673.86	5014.8	5833.44	5930.34	2388.7	3115.24	6143.3	3585.94	3274.1	5798.62	14217.9	3763.08	4002.1	2378.72	2945.04	2141.24	3960.58	2454.5	2233.68	3766.14	5515.22	4592.62	2827.06	2006.46	3192.16	2019.4	2719.42	5615.78	2478.26	7393
1	Lyso_PI(18:3)	612.2805 -> 335.2805	1010.2	1055.18	1009.76	1152.22	1071.16	1131.58	1100.86	1205.78	1079.52	1174.76	1023.52	990.16	1102.8	1076.68	1148.36	1008.28	1090.72	1074.08	1124.84	1082	1291.6	1120.7	1040.38	1010.96	1249.32	1251.9	984.04	1038.98	1028.54	1082.14	1031.22	1040.9	1076.54	1106.94	1200.28	1059.14	1233.52	1123.64	1060.5	1081.34	1463.94	1033.24	1149.24	1308.86	971.96	1319.92	1159.48
1	Cer(d18:1/22:0)	622.6 -> 264.3	2354.04	2772.26	2816.58	3222.78	2289.16	1889.1	3319.12	3008.98	2581.18	2179.28	2672.28	3494.1	1520.18	8117.34	5738.86	2947.88	2370.64	3989.54	2547.18	4560.08	3261.16	2131.76	2164.74	3960.6	2222.4	1992.24	2861.06	32518.6	2404.36	2522.58	1863.72	2118.88	1829.5	2681	2014.38	1634.96	3902.54	7000.98	2844.48	1882.14	1736.4	2800.78	2031.02	1793.64	3501.88	1743.48	2860.18
1	Cer(d18:0/22:0)	624.6 -> 266.4	1703.58	1353.82	2001.74	1332.98	1764.32	2045.02	1478.76	1923.08	1477.88	1791.72	1910.26	1599.38	2265.22	1928.16	1751.1	1487.48	1814.32	1785.32	1861.64	1924.48	1527.72	1769.56	1461.94	1630.96	1869.28	1654.9	1857.98	2332.62	1687.56	1534.8	1404.8	1644.24	1336.24	1728.86	1695.4	1768.3	2475.8	1750.2	1561.88	1371	1880.42	1629.74	3084.88	2543.9	2059.42	1532.68	1577.18
1	PG (24:0)	628.392 -> 439.392	1039.12	1039.78	1121.7	979.9	1202.3	1183.34	1158.18	1100.8	1062.14	1112.22	1063.78	1095.9	1407.82	1148.14	1153.76	1114.88	1081.6	1086.2	1068.7	1024.68	1090.74	1111.26	1145.38	976.1	1181.32	1081.7	1130.24	1154.36	1075.36	1081.28	1110.38	1122.46	1048.48	1189.08	992.2	1036.3	1117.1	1407.26	1032.86	1119.1	1119.52	1034.48	1085.78	1089.02	1123.32	1074.56	1063.1
1	16:1 Cholesteryl ester	640.5689 -> 369.1	2283.96	3159.86	7003.36	4407.24	3867.06	6723.74	6489.34	4747.26	13570.1	3986.94	8904.46	4423.46	10338.6	4225.48	7548.16	10444.3	7721.98	9384.32	3869.6	20047	5482.32	6592.64	7071.5	14726.1	4358.36	5123.64	9799.42	6888.32	6461.74	9381.92	5576.4	6778.42	12122.7	17320.3	3655.54	2436.18	2001.52	3733.78	7831.18	7669.9	4031.7	8847.62	2335.4	1729.72	3298.6	3733.14	2995.1
1	16:0 Cholesteryl ester	642.5845 -> 369.1	3819.96	5926.12	7089.02	5967.8	5761.58	8778.28	6876.4	6762.2	14182.8	6148.76	11976.5	6102.64	16141.1	9064.46	12305	13095.5	8383.02	13957.5	6960.3	21043.8	7237.64	6594.02	7045.64	12826.1	4740.14	4445.54	13484.9	7930.72	7223.94	8686.22	5860.58	8123.88	8446.46	14478.2	6252.04	3402.48	3244.1	6187.08	11334.3	8719.08	4763.2	9299.48	2974.8	3098.04	4966.68	4657.8	5195.04
1	Cer(d18:1/24:1(15Z))	648.6 -> 264.3	2889.58	3036.84	2198.5	4374.98	2537.2	2222.48	3482.5	3462.34	2692.42	2473.62	2234.4	3048.02	2406.88	13951.2	5820.52	2820.18	2394.74	4580.28	2520.42	3306.46	3688.68	1577.2	1952.82	3939.3	1727.5	2102.22	2480.78	24030.1	3767.28	3065.04	1885.6	1845.02	1902.32	2746.3	2421	1622.14	3134.54	6486.22	4061.08	1764.22	1646.52	2224.78	1655.1	1444.96	9687.56	1619.36	4326.64
1	Cer(d18:1/24:0)	650.6 -> 264.3	2755.04	5126.94	2896.9	5090.04	3755.96	2660.26	3874.72	3930.7	3912.86	4140.78	3977.88	4954.92	2505.76	10877.4	10532.3	4131.94	3422.14	6258.82	4140.92	6138.92	4951.88	2537.58	3072.16	7350.28	3205.32	3670.58	4465.38	33460.7	4360.12	3646.44	2820.76	2556.18	2761.36	3603.34	3041.28	1792.46	4101.8	7519.38	4262.14	2395.08	2191.02	2852.46	2039.72	2126.6	5479.16	2717.26	4870.54
1	16:2 Campesteryl ester	652.5689 -> 369.1	1353.22	1287.34	1031.6	1038.46	1191.78	1157.84	1072.16	1153.48	1133.68	1143.14	1236.94	1095.66	1308.22	1259.52	1142.46	1182.96	1172.2	1513	1306.62	1351.26	1181.74	1130.06	1345.5	1191.6	1179.36	1161.12	1276.38	1083.48	1425.54	1091.84	1089.12	1222.98	1267.8	1363	1079.12	1167.02	1644	1207.96	1204.92	1327.76	1845.14	1387.1	1149.56	1648.9	1336.78	1218.78	1195.68
1	18:3 Cholesteryl ester, 16:2 Stigmasteryl ester, 16:3 Sitosteryl ester	664.5689 -> 369.1	1928.86	2323.82	4519.64	3163.42	2045.06	3506.16	2854.18	3308.2	6341.48	2352.08	4862.74	2405.82	6108.08	1979.54	4133.32	4321.82	3898.46	5116.22	2210.46	10100	2216.92	2987.9	3399.12	5802.74	2558.74	2579.16	3627.98	2929.6	3880.9	5511.6	2476.82	3392.06	4428	9091.22	2586.16	1563.42	1920.64	2282.16	4624.56	3413.1	2311.9	4271.04	1420.5	1388.14	2158.8	1832.68	2132.24
1	18:2 Cholesteryl ester, zymosteryl oleate, 16:1 Stigmasteryl ester, 16:2 Sitosteryl ester	666.5845 -> 369.1	19677.2	30542.9	55346.6	44513.6	33905.5	63168.5	52679.1	55513.8	148705	36890	89226.7	39207.9	145625	27690.4	78539.4	110575	67539.7	109487	30937.1	242044	45289.6	48971.2	43664.6	99194.2	25941.4	27984.2	75316.7	55618.8	56536.1	89213.6	37068.6	49644.3	75397.3	148606	37698	14327.8	11862.9	22007.1	87411.5	94724.3	23564.7	75587.2	12833.9	9146.38	25735.2	27860.7	24168.3
1	18:1 Cholesteryl ester, 16:0 Stigmasteryl ester, 16:1 Sitosteryl ester	668.6002 -> 369.1	8424.4	11165.8	15820	19569.2	13473.5	17294.8	16441.9	19664.7	36177.2	12914	27308.6	12204.1	46393.7	19576.7	33942.7	33587.9	21717.9	32917.6	12935.3	55118.6	19765.6	14480.7	18622.8	30259.1	7938.3	9316.34	28848.6	23677	23855	29278.4	14117	18895.8	26775.8	62272.5	14585.1	6069.94	6529.88	17674.7	24297.7	19320.2	7288.62	23397.8	5266.5	5294.14	12621.8	9339.96	13805.3
1	18:0 Cholesteryl ester, 16:0 Sitosteryl ester	670.6158 -> 369.1	3626.88	4733.52	4502.86	4489.56	4549.92	4537.02	5341.74	5516.96	6297.48	5332.78	6465.84	4698.74	6408.14	8022.3	6477.72	6582.72	6732.36	6276.22	5844.24	8753.26	6287.74	5298.02	5523.78	6202.46	3971.06	4347.2	7237.4	5866.9	4881.9	5401.74	4410.52	4029.5	5839.8	7203	5579.82	3506.78	4127.96	5678.96	6172.18	4646.26	4033.7	5756.92	3402.62	3110.44	6209.16	3361.26	5579.3
1	PI (22:0)	674.3975 -> 397.3975	1273.4	1012.54	982.38	1058.24	1210.1	1129.3	1216.14	1219.54	1262.28	1198.44	1099.2	1090.72	1184.8	1249.18	1137.64	1065.96	1102.56	1119.24	1099.12	1115.9	1214.32	1075.38	1221.3	1160.28	1011.6	1049.06	1021.34	1102.96	1174.92	1088	1071.2	1295.36	1009.94	1127.62	1164.46	1355.94	1157.46	1275.94	1067.12	1086.76	1169.46	1173.62	1338.24	1107.52	1062.72	1197.34	1203.82
1	Cer(d18:1/26:1(17Z))	676.7 -> 264.3	1150.68	1115.22	1119.64	1121.34	1212.38	1338.92	1182.7	1070	1137.24	1062.58	1178.94	1096.74	1137.46	1819.78	1597.7	1116.88	1154.18	1119.24	1181.78	1273.74	1179.52	1157.38	1279.02	1485.98	1216.78	1062.12	1110.7	1628.76	1165.36	1235.34	1109.88	1253.7	1056.88	1381.8	1121.22	1010.26	1142.76	1586.72	1091.28	1070.56	1140.3	972.52	1157.72	1102.72	1316.88	1037.76	1322.16
1	Cer(d18:1/26:0)	678.7 -> 264.3	1809.62	2649.9	2233.9	2500.98	2450.54	2387.46	1813.14	2203.46	2130.5	2533.42	1706.14	1473.52	1501.82	4742.44	6955.84	2024.82	2115.82	2074.04	2744.52	2473	3029.32	1574.64	2008.58	3782.76	1665.3	1752.84	2545.94	4156.52	2191.44	1549.2	2266.64	1500.58	1553.42	1936.28	1472.86	1212.58	1758.12	2492.92	1859.74	1445.62	1729.02	1961.02	1599.04	1838.36	2492.08	1508.48	3031.36
1	PS (28:0)	680.4498 -> 495.4498	11217.8	14006.6	12910.2	14471.9	14107.3	13576.7	16729.3	17445.5	15058.4	16010.3	16084.8	14974.5	17601.8	18450.7	16975.2	14931.7	16806.7	17346.3	13460.4	17254	16872.6	17399.7	15269.2	15990.8	17949.2	11784.7	16718.4	15296.4	16339.5	12875	16075	15868.1	13783.3	18580.9	13188.9	11060.3	5191.14	20285.5	16499.8	18393.4	4795.6	16879.6	5084.1	4996.6	16805.3	10905	13766.8
1	18:0 Campesteryl ester	684.6315 -> 369.1	1635.78	2221.24	1983.48	1709.32	1686.9	1482.24	1827.92	1953.8	1778.58	1866.96	1746.32	1883.54	1986.3	2827.46	2339.46	2109.28	1501.52	2423.82	1626.58	1999.06	2093.02	1683.56	1770.78	2535.64	1567.4	1425.78	2155.08	2189.54	1281.04	1735.7	1740.16	1701.28	1911.12	2362.2	1483.7	1369.32	1385.28	3725.2	1675.56	1596.9	1339.24	1578.96	1458.64	1694.64	2487	1822.96	1793.9
1	20:4 Cholesteryl ester, 18:3 Stigmasteryl ester	690.5845 -> 369.1	3969	7964.48	9981.16	8477.92	4679.64	10318.4	6728.4	8622.28	16411	6314.02	11618.7	5786.8	21726.7	5523.18	11316.2	10819.7	8870.36	14732.7	4924.74	18412	5306.84	6397.26	5228.42	13673.8	3699.66	4530.36	7764.1	7063.12	10968.4	16256.5	5020.58	7318.46	8261.6	32512.9	10309.4	2427.7	3632.94	8010.34	10631.3	9205.64	2959.12	9141.24	2699.64	3006.9	4721.5	4195.78	4429.08
1	19:0 Campesteryl ester_simulated	698.6315 -> 369.1	1805.82	1828.48	2078.76	2158.62	1581	2132.94	2805.48	2004.24	1895.48	1483.14	2298.02	1622.64	1726.62	3424.96	2481.78	2095.18	1685.36	2234.56	1731.48	2827.46	2046.18	1973.12	2640.34	3409.44	1866.3	1651.42	2299.04	2022.6	2554.14	3021.74	1442.86	1875.76	2294.8	2219.52	2160.62	1629.12	1539.98	2083.7	3319.92	1643.22	1504.44	2206.04	1445.3	1276.88	2475.32	1945.62	1762.8
1	20:0 Cholesteryl ester, 18:0 Sitosteryl ester	698.6471 -> 369.1	1924.68	1625.9	2210.22	1682.88	1643.28	2720.18	2197.22	1343.42	1926.52	1811.24	2066.84	1843.5	1721	2903.86	2785.58	1739.46	1276.52	2480.7	1618.64	3334.88	1846.8	1990.6	2571.76	2539.34	1566.3	1396	2204.88	2134.68	2038.98	2644.96	1799.7	2289.56	2466.18	1991.52	1544.26	1532.76	1372.12	2163.58	2174.88	1445.22	1696.56	2871.9	1441.56	1504.82	1788.2	2097.78	1768.28
1	SM (d16:1/18:1)	701.6 -> 184.1	8605.48	10998.6	5789.06	12447.4	5794.4	8612.84	7180.46	15149.4	11708.4	8688.92	8645.62	8068.74	10703	9130.98	10318.4	11250.3	10518.6	15709.1	7289.12	18526.4	8698.78	6865.3	8542.54	10149.7	5781.84	6730.66	8469.04	9277.94	8059.82	7668.7	6271.46	4614.74	7397.08	12882.3	7975.04	3343.9	5481.54	4897.9	13207.3	8272.38	5335.14	7169.74	4510.38	2706.42	6209.54	6133.92	7215
1	PC (30:2)	702.5 -> 184.1	4897.78	6031.84	3225.7	7127.52	3873.56	4126.72	5065.12	7253.28	6217.82	4900.88	4818.4	3716.62	5239.98	5676.08	6360.24	5659.22	5831	8708.9	4975.88	9030.24	4981.6	3548.1	4616.66	4469.6	3453.32	3482.02	4887.72	6343.36	4611.48	4358.6	4134.2	3034.12	4121.66	7332.46	3736.36	2517.92	3375.76	3369.94	6197.3	4294.34	3159.48	3431.56	2904.36	2549.36	3358.42	3958.76	4305.06
1	PEo (34:2)	702.5433 -> 561.5433	3266	3903.98	2008.02	4080.24	2974.94	2622.48	2765.68	3373.04	3041.08	3081.04	2882.66	2845.66	2643.48	2430.74	2410.5	3116.2	2677.82	4203.96	3162.62	2830.38	2794.98	2501.66	2595.06	2455.2	2284.62	2433.62	1854.32	5676.9	1978.04	2463.66	3600.68	1931.96	3154.12	2982.48	2473.6	1520.96	2115.48	1835.58	3887.96	3405.88	2132.46	2040.52	2265.66	1944.46	1701.72	1846.66	1930.98
1	SM (d18:1/16:0)	703.6 -> 184.1	557151	738523	308731	831564	368300	438115	502200	856088	635947	481490	476172	538001	582745	619636	738196	704780	525897	1.14737e+06	661249	1.10767e+06	592529	394376	454794	602677	390215	378801	539228	582118	518111	426784	352501	253001	442333	598549	447195	194733	273291	286046	723091	528483	213116	409123	202473	128692	377182	346401	474644
1	PC (30:1)	704.5 -> 184.1	184667	238109	103215	263804	116367	142280	171681	285496	201210	164939	154154	174059	191691	203930	238725	224532	168591	380996	219294	353541	193156	129170	154539	196733	127268	124323	173081	195683	164311	135602	113827	80458.8	141405	193611	143994	66339.8	87582.8	95909.2	233758	175864	72465.9	136179	66779.5	42976	121764	110815	152907
1	PEo (34:1)	704.559 -> 563.559	3159.66	2289.54	1746.32	3508.24	2277.68	2498.74	2151.48	2883.9	2212.34	2346.08	4041.8	3107.98	1969.32	2277.8	2141.1	2644.64	3023	3556.64	2529.68	2340.46	2537.44	1836.4	2467.76	1820.06	2042.56	1827.78	1782.54	5609.48	2242.2	1987.54	2126.96	1702	1951.18	1799.28	2164.1	1610.36	1342.1	2651.06	3179.88	2126.64	1773.92	1784.32	2026.94	1487.36	1899.86	1920.2	1607.98
1	SM (d18:0/16:0)	705.6 -> 184.1	72204	109232	40689.8	169028	53860.5	53585.2	75995.1	106053	82521	84227.6	76002.5	62553.2	73672.5	161623	100437	83731.2	67410.9	153710	104006	139603	83826.6	56591.8	70489	72098	52952.6	72667.8	69550.9	100486	73483.5	64415.3	54687.7	38043.2	60686.6	75013.1	74990.1	29901.9	38720.5	50855.3	97895.4	58130.2	33499.8	61178.2	33545.5	23379.9	79554.3	43705.7	75597.8
1	PC (30:0)	706.5 -> 184.1	18794.2	29668.2	10947.9	50316.7	15731.8	18554.1	22995.3	30048.6	26623.7	26925.9	24428.4	19222.5	23069.2	54866.3	30515	29853.7	20926.5	47597.5	31392.4	39459.6	25989.8	18163.4	21359	21065.6	16821.9	21420.5	22255.8	47877.4	22172.3	17481.7	15536.3	13862.4	17728.4	19522.9	22517.6	9979.5	10781	17965.8	33068.3	18845.8	11632.1	19484	11328.9	6944.66	25000.8	14113.8	23298.4
1	22:6 Cholesteryl ester	714.5845 -> 369.1	1716.2	2260.54	1945.4	1387.66	1760.4	2467.08	2253.2	1947.34	2747.8	1789.72	2368.26	1560.24	2962.2	3588.58	3235.74	2036.12	1937.68	2650.96	1724.62	3475.52	2090.04	1502.62	1622.44	2340	1735.4	1871.28	2241.66	1843.88	1724.72	2184.32	1716.38	2048.34	1739.04	2553.5	1798.2	1316.14	1612.54	2339.48	1924.36	2014.42	1386.4	1868.08	1287.58	1506.42	1855.2	1729	2742.14
1	PE (34:2)	716.5226 -> 575.5226	11727.3	9603.82	4645.7	15585.4	7356.12	6737.58	6282.1	10481.3	9186.08	5372.44	6313.18	9018.16	8640.32	3129.2	8356.86	8499.44	8290.66	10571.4	7384.78	6930.62	8566.12	6826.46	6184.06	5841.12	6749.14	5103.52	4125.76	17664.7	6170.38	5359.34	8444.3	5680.98	11481.7	7043.44	7906.12	3891.44	4057.12	2973.3	8535.38	8674.26	6234.2	7820.02	6188.44	3686.94	3086.86	4419.38	7252
1	22:5 Cholesteryl ester	716.6002 -> 369.1	1558.08	1474.46	1561.36	1548.58	1441.98	1888.04	1977.82	1728.78	2000.32	1753.62	1871.2	1271.36	1824.4	1828.32	2033.8	1575.2	1501.36	2095.66	2004.86	2061.16	1596.86	1627.14	2140.8	1647.84	1780.36	1544.22	1798.94	1456.4	1887.6	1832.16	1538.16	1606.08	1538.54	2569.44	1642.96	1433.12	1722.26	1587.62	1930.02	1434.12	1385.26	1838.12	1563.18	1466.6	1512.02	1468.82	1779.66
1	PE (34:1)	718.5383 -> 577.5383	14109.1	17776.7	8846.92	32110.9	12911.9	12695.3	10402.6	18979.9	16225.4	11799.3	10629.9	14270.3	15409.3	5869.9	13535.6	17024.7	12639.4	21072.8	21565.4	11710	14631.9	9851.66	10858.9	10153.1	11623.4	8979.8	7820.58	29750.3	13732.5	7444.7	12950.4	10016.4	15365	14576.4	12623	7629.78	6157.34	7993.24	17395.2	14491	10239.8	15019.3	6686.92	5152.82	4916.94	8097.82	11401.2
1	PCo(32:1)	718.6 -> 184.1	14961.9	15591.7	6909.36	18487.8	11053.4	10952.2	14560.4	19810.9	13142	13244	12803.3	15058.8	13320.1	29458	17579.9	14448.5	13572.6	23563.7	15529.8	21394.5	16783	11824.9	14487.1	12367	9535.64	10116.1	11476.3	24391.7	10937.8	9591.52	8900.2	6644.42	10538.1	11655.1	9297.96	6038	5861.48	6744.24	17646.1	11705.6	6259.06	9810.26	5786.64	3664.66	8883.9	9234.92	11937.5
1	PE (34:0)	720.5539 -> 579.5539	2762.22	2809.34	1830.5	4494.74	2222.24	2186.8	2423.66	2988.42	2668.2	2075.22	1771.08	2745.62	2195.38	2028	2040.56	2321.3	2753.32	3006.36	3527.62	2170.98	2713.6	2142.88	1870.82	1673.08	2038.52	2155.08	1779.96	5427.96	2705.78	1811.66	2128.64	1779.22	2486.14	2192.42	1972.3	1635.2	1601.16	1841.38	3001.98	2301.3	1944.96	2462.68	1614.84	1693.84	1460.36	1928.96	1580.74
1	PCo(32:0)	720.6 -> 184.1	12853.6	11651.9	7249.58	19527.1	10952.8	11374	12625.1	14451.7	14490.4	10540.8	14668	10675.9	13263.8	37628.9	18582.1	16627.5	12445	23603.8	15718.7	25035.8	13224.6	9505.36	13773.7	14655.8	11160.4	8393.3	14743.2	32240.2	15420	8992.4	7891	7601.22	11662.9	13613	8825.36	6698.7	6475.76	9542.26	24683.4	13004.8	7232.3	10090.1	5976.96	4476.62	11152.2	8973.7	13411.7
1	Cer(d20:0/26:0(2OH))	724.7 -> 292.4	1129.38	1054.42	1070.72	1113.54	1189.56	1089.94	1195.08	1112.42	1051.52	1063.88	1138.02	1024.76	1372.18	1201.52	1137.22	1108.9	1154.26	1243.22	1152.14	1147.06	1141.1	1040.16	1214.98	1162.9	1062.14	1131.52	1056.18	1169.02	1042.98	1169.62	1048.04	1020.2	1076.76	1014.58	1173.88	1098.22	1179.46	1034.54	1277.58	1106.7	1159.34	1052.46	1205.5	1069.04	1111.62	1047.88	1202.66
1	22:0 Cholesteryl ester, 20:0 Sitosteryl ester	726.6784 -> 369.1	1557.6	1511.6	1394.98	1247.44	1646.78	1905.1	2219.88	1428.16	1637.94	1769.9	2007.96	1477.56	1754.28	2985.44	1752.96	1827.72	1974.2	1614.62	1988.28	2122.1	1803.48	1865.98	1896.68	1591.24	1851.42	1487.32	1668.92	1900.78	1500.38	1488.32	1800.3	1461.68	1740.52	1745.56	1853.42	1778.94	1828.2	2060.26	1800.78	1756.18	2039.52	1523.84	1524.76	1538.06	1720.46	1970.4	1548.38
1	PC (32:2)	730.5 -> 184.1	4167.74	4147.82	2697.02	6114.76	2844.3	4467.16	3349.84	3940.46	5797.96	2817.22	3911.52	4463.62	5624.38	4878.6	5130.52	6544.42	3955.08	6965.92	4211.04	5604.56	3679.98	3204.22	3922.92	3499.28	3242.66	3844.8	2814.5	14088.1	4154.74	3507.28	2870.28	2346.48	3427.2	4689.22	4256.64	2430.1	2089.74	2515.66	5436.68	4310.98	2993.22	3741.08	2871.54	2479.38	2161.98	2895.96	3020.88
1	PEo (36:2)	730.5746 -> 589.5746	5808.7	6375.08	2710.5	7021.3	4111.48	3805.38	3632.08	5413.34	4074.52	3276	3432.5	5590.82	4404.96	3467.4	4072.4	4296.8	4231.6	5835.68	5028.12	3788.04	6043.68	4543.1	4216.68	2717.9	3544.7	3444.28	1912	5855.02	2804.74	3240.44	3861.88	2952.6	5927.04	4509.4	3127.16	2654.14	2180.3	2277.08	4452.22	4056.06	3349.92	4072.06	2789.3	2231	2687.6	2894.12	3373.22
1	SM (d18:1/18:0)	731.6 -> 184.1	30218.6	26663	18022.2	46067.8	18683.8	24604.6	21498.5	36669.9	39219	21540.9	28486.2	23686.3	31897.4	29182.6	38699.2	50664.9	30615.4	61727.4	30202.5	63376.3	25422	17643.8	26937.5	31858.3	21883.1	18253.8	35563.1	42747.3	27918.4	21981	13942.3	20516.1	22788.8	46859.2	25880.9	11860	16133.9	17971	50804.9	32826.7	10665.1	27022.1	9390.44	6954.48	12648.6	20712.1	21763.2
1	PE (36:8)	732.46 -> 591.46	4353.88	6120.92	2012.8	6409.46	4480.58	4351.68	4656.9	6665.92	3267.36	4490.12	3840.26	5430.4	4200.58	2460.66	3878.52	3623.98	4233.16	4548.76	6261.86	3374.24	6346.62	4263.54	4775.32	3295.58	3221.64	4221.06	1986.08	4217.72	4242.4	3272.32	3796.9	2577.68	4757.42	3073.88	3408.26	2567.78	1667.02	2377.6	3983.68	3475.2	3520.78	4209.96	2165.48	2177.52	2125.48	3734.9	3702.04
1	PS (32:2)	732.4811 -> 547.4811	1844.08	1882.6	1897.08	2314.2	1781.42	1710.16	2209.88	3091.36	2323.26	2976.52	2690.2	1923.52	2783.08	2386.06	2725.88	2023.94	2526.92	2281.46	2455.04	2149.12	2636.94	2423.68	2137.54	2596.34	2160.8	2442	2712.22	2217.98	1780.98	2243.56	1757.36	1846.96	1973.88	2607.22	1738.22	1672.96	2261.72	2646.52	3008.7	2632.3	1834.98	2345.18	2086.24	1818.82	2656.18	2265.74	2853.2
1	PEo (36:1)	732.5903 -> 591.5903	6820.56	6276.94	2714	9078.86	5374.02	4630.22	5149.46	6073.54	3435.94	3616.42	4231.64	6551.88	5808.22	3612.6	4530.88	3744.76	4330.28	5292.66	7930.5	3342.96	6169.28	4336.38	4503.14	3517.46	3847.78	4081.94	2478.94	4916.84	3848.02	3370.22	4113.94	2974.92	4917.66	4018.8	3704.84	2819	1445.98	2183.3	5357.88	3891.52	3359.46	4932.7	2746.3	2254.9	2766.14	2817.36	3672.24
1	PC (32:1)	732.6 -> 184.1	37779.1	32790.8	24187.7	60064.5	21689.3	34774.9	26953.4	42993.8	59776.9	27768	36252.3	29521.3	40405.4	54213.2	52172.8	65558.6	36216.9	79760.2	36687	60590.4	29614.3	29312.6	34638.3	36893.6	30643.6	24420.3	34744.6	154325	37155.7	29715.2	20175.3	24077.1	30480.3	45214.6	32250.6	16711.8	16532.6	21449.7	59718	37439	21216.5	37559.2	14090.3	10746.1	15937.3	26677.2	30249.3
1	SM (d18:0/18:0)	733.6 -> 184.1	14780	14156.3	10230.4	27558	10037.2	13104.9	12139	19782.1	23293.8	11537	14116.8	12389.6	15625.7	26716.7	19402.1	24643.9	13790.6	29464.4	16106	21902.4	12233.3	11344	15196.3	13838	13160.9	10230.1	13821.1	60009.6	16162.2	11758.1	9570.94	11573.4	12890.3	16346.6	13424.7	7093.6	7790.3	8044.88	24267.8	14125	8435.42	16118.6	7318.1	5279.74	8069.76	10107.9	13452.4
1	PC (32:0)	734.6 -> 184.1	47041.8	39288.7	31344.6	88552.5	33152.2	48036.6	51960.1	69408.2	78747.8	33340.5	52087.9	36050.4	51347.9	76923.1	82576.9	83082.2	45761	119751	64867.2	113024	46342.5	34892.2	45763.6	55734.2	43068.2	33868.4	61886.7	240398	62923.5	34528.5	24607.3	31976.9	35900.1	60870.5	41724.9	24045.3	30854.6	46774.7	112311	49929.7	28683.1	51124.6	20755.8	12401.7	29671.8	30412	37644.7
1	PE (36:4)	740.5226 -> 599.5226	7058.72	6308.48	2554.84	10027.2	4087.72	5683.82	3636	4724.68	4639.18	2670.9	3334.06	6810.88	7416	1589.34	4650.4	5301.4	3836.8	6250.94	6100.52	4894.72	4614.94	2813.4	3033.3	2523.24	4078.04	3531.36	1741.38	8188.02	5027.36	3091.68	3372.64	3824.1	6084.7	4665.78	7520.2	2977.42	2602.82	1671.7	6980.52	6466.52	3629.78	4803.34	3609.16	1969.82	2287.56	3484.48	2717.6
1	PE (36:3)	742.5383 -> 601.5383	21684.9	22555.9	7353.9	31033	10427.8	13161.4	8952.78	15751.4	12988	7288.52	7027.16	15929.9	20040.1	2973.04	10179.6	15693.1	14085.2	14484.8	12748.5	7561.06	14406.9	12448.3	9125.82	4580.04	9776.38	9427.58	3243.88	11051	10924.5	10498	14359.3	10515.8	25654.1	15464.5	16927.2	6162.46	5374.16	2859.84	14328.5	12195.7	11820.1	17084.4	9186.24	5477.34	4760.18	7140.64	10264
1	PCo(34:3)	742.6 -> 184.1	5015.66	2520.74	2291.38	4126.62	2436.06	3561.1	2877.62	3201.2	5880.06	3004	6241.58	2387.74	3150.78	9986.92	4221.82	5715.24	4075.82	5834.86	2631.02	5781.62	2573.96	2270	4025.38	2334.22	2871.3	2933.36	1838.28	7301.48	4231.3	4524.1	2414.22	1934.9	4628.86	4176.82	2885.02	1523.96	2602.18	1718.36	5892.92	5564.34	2549.08	3275.34	2823.7	1781.42	1905	2285.32	2644.88
1	PE (36:2)	744.5539 -> 603.5539	94962.7	92214	32196.9	111454	46205	64662.7	44988.2	83894.8	59672.1	45235.7	39009.4	69679.5	82159	13936.3	50152.9	73508.3	67087.2	83387.8	63736	49926.1	74238.5	50292.2	47440.2	29385.3	51533.2	47711.1	17182.6	44447.7	42319.6	42664.4	68415	42869.1	104386	65465.1	60640.6	24466.4	19782.2	10398.5	61142.2	55432.9	42481.6	68404.3	38317.1	20449.8	22531.4	26969.9	51660.9
1	PCo(34:2)	744.6 -> 184.1	17382.6	10376.7	7320.28	18255.7	9817.12	13650.6	12017	12191	20484.5	12710	21243.5	11162.9	12778.7	45394.4	20056.9	17421.2	11942.9	20993.5	14474.5	18273.1	12198.7	8908.06	15011.9	9060.74	10099.7	12999.1	8636.58	32866.2	14853.4	10950.6	9311.66	6986.5	13484.7	12802.1	8224.26	5732.56	6291.22	6494.36	18402.9	16977.3	7281.16	10706.9	7032.28	4943.88	12147	7892.7	12864.5
1	PE (36:1)	746.5696 -> 605.5696	63847.9	74487.9	25287.9	102590	43810.5	47400.2	45521	67221.8	42823.1	38738.9	28777.8	62940.8	55774.6	15389.6	41432.7	47316.5	43675.4	75585.8	58269.2	42493.4	57949	34177.7	44900.8	30557.4	42274.5	35866.9	20280.2	37872	42718.9	33810.1	48901.2	27013.6	69751.9	52827.6	41629.8	24107.6	15464.7	13157.7	56631.8	41436.9	30507.3	50443	27347.9	16729.2	20021.8	23623.2	40062
1	PCo(34:1)	746.6 -> 184.1	25286.8	22246.9	12527.9	40484.6	19302.7	23038	23086.3	28962.7	28941.8	21663.6	33055	21845	25567.5	84101	39086.2	31818.7	22580.7	44147.9	28587.5	34404.1	24676	16230.8	23576.1	22386.9	19343.7	19075.3	20054.9	54537.8	32329.6	17381.2	14865.4	15757.2	19636.4	26059.1	18272	11668.6	10421.8	17190	38093.1	24822.9	12778.4	22057.7	10081.2	8073.2	17471.6	16523.2	24033.2
1	PEp (36:6)	748.5277 -> 607.5277	6716.24	8479.52	3627.12	10249.5	4638.34	5528.16	4980.88	7149	5006.02	4277.44	3661.62	6302.3	4949.58	2778.22	5425.06	5855.42	4904.68	8013.4	5930	4828.42	6196.94	3890.56	4505.1	3705.34	5029.9	4713.34	2348.84	4621.52	6098.26	4229.54	5043.7	3372.54	7620.3	4486.38	4231.92	3069.42	2526.22	2610.8	6504.54	4383.36	4294.96	5624.5	3917.72	2112.48	3495.38	3225.96	4536.34
1	PE (36:0)	748.5852 -> 607.5852	5444.78	6471.6	3579.96	10206	4866.78	4647.3	5961.48	6940.14	4674.12	4133.58	3833.76	6612.3	6157.82	2924.1	4900.5	3982.88	5261.68	7642.54	6877.1	4965.82	5482.8	3468.64	4962.06	3668.2	4678.34	4010.1	2557.6	4907.46	4911.84	4268.42	4882.84	3284.86	6425.96	5276.38	5032.38	2933.46	2931.88	2199.26	5851.98	4522.7	3745.62	5796.6	3234.18	2031.38	2673.36	2883.3	3940.02
1	PCo(34:0)	748.6 -> 184.1	8556.74	8525.14	4847.7	12244.1	7390.18	6631.96	9258.48	10604.4	8230.92	7815.88	8632.72	7077.9	7612.48	33049	14584.3	9319.88	8036.16	14925.4	10108	12884.3	9105.66	5825.72	9109.5	6985.08	6638	6665.36	7708.66	17688.3	11648	6685.04	5142.26	5150.16	5880.2	8024.66	6647.3	4949.54	4819.92	7988.06	12481.3	6881.74	3798.4	6639.26	3439.58	2948.44	13895.3	6152.14	11340.9
1	PEo (38:5)	752.559 -> 611.559	3870.3	3883.9	2294.82	6706.2	2412.8	4106.9	2226.02	3439.42	4088.18	1833.36	3083.6	2751.2	4387.04	1711.64	4122.44	5164.5	2643.84	4242.32	4246.34	3954.54	2575.38	2253.64	2910.72	2167.06	3075.34	2386.24	2309.7	7196.78	4820.2	3697.3	2079.46	2419.18	3125	3795.26	4529.16	2102.44	2572.1	2215.82	4632	3539.88	2781.66	3507.74	2862.12	1944.56	2425.98	2267.12	1664.4
1	PEo (38:4)	754.5746 -> 613.5746	3180.8	4273.24	2010.22	5484.02	3236.08	3586.82	3109.34	4301.4	3743.12	2250.42	2425.8	3737.18	3641.56	1884.66	2804.6	3717.22	2604.44	4004.12	4694.88	3153.8	3764.38	2522.84	2506.32	2179.7	2634.6	2283.54	1869.26	4902.1	3960.72	2629.92	2631.58	2555.54	3719.36	2810.44	3539.7	1884.64	1679.7	1937.3	4918.44	3535.28	2035.78	2964.42	2125.14	1902.98	2279.56	2516.92	2063.46
1	PC (34:3)	756.6 -> 184.1	8315.08	6544.64	5354.72	14051.1	4110.22	6282.46	4740.52	6538.78	8891.3	3891.9	5464.2	6506.72	8811.06	5195.3	8055.1	10865.8	5735.92	10956.2	7895.22	6602.74	4483.28	5838.74	6812.62	3332.64	4573.62	5466.78	2877.86	29718.7	6956.9	6066.36	4545.98	4998.32	7111.32	6167.42	6435.94	3430.16	3386.44	2549.08	8221.26	6858.26	5393.32	8126.8	3796.8	2922.56	2840.94	4775.12	5221.42
1	SM (d16:1/22:1)	757.6 -> 184.1	6909.62	5723.44	3924.7	11680.6	4467.94	6752.16	5060.44	6955.72	10223	4349.66	5623.28	5875.82	8367.78	4751.6	7584.48	11174.5	5672.98	11240.6	6668.98	8851.8	6120.5	5497.4	5873.84	4386.72	5610.26	5337.5	3865.48	20390.7	7357.3	5836.96	4216.58	4780.48	6613.02	8975.6	6514.92	2567.04	3365.78	2816.66	9609.6	6333.4	5192.96	7552.86	4041.6	2415.14	2362.94	4438.84	5013.38
1	PC (34:2)	758.6 -> 184.1	157030	115849	63980.7	220660	81734.3	122267	85513.3	143102	199821	74722.1	110522	102692	163861	88359.7	157132	217268	120120	232937	149161	169949	105965	93129.8	109454	74244.8	103578	104112	53572.9	467520	116665	96674.7	81230.1	76017.6	133012	110385	105486	46373.2	55459.7	36815.6	190119	145519	85279.1	140186	67947.8	32041.1	44446.6	87516.2	116751
1	SM (d18:1/20:0)	759.6 -> 184.1	77333.1	59752.4	35118.1	116105	42716.6	63286.9	47850.5	74787.7	99427.6	41511.8	57460.3	53556.2	80295.4	52488.2	86627.2	111187	65730.2	130647	83068.3	98702.6	58966.2	44064.3	57180.5	47085.1	56334.1	52881	42695.1	211784	62898.7	50910	41210.8	40854.8	65264.5	69722.1	56212.7	25037.8	32916.7	24450	108397	77849.4	41203	74956.9	30793.9	17761.5	26737.4	46982	58043.9
1	PC (34:1)	760.6 -> 184.1	276557	240757	143497	450690	174777	230696	195482	327321	388104	171801	221947	237784	324560	261961	399860	403204	255714	572023	379532	398868	267229	177342	240862	226791	187095	185006	184456	759665	257930	196725	144783	158002	225230	292650	216802	100293	123410	108876	428728	278483	137035	254048	106479	74284.1	99963	180365	250496
1	SM (d18:0/20:0)	761.6 -> 184.1	101693	83449.5	55321.5	179155	64321.2	90446.5	70912.4	125987	139670	67679.3	91774.5	89259	123210	102241	148875	157811	94137.6	220731	138811	152533	98917.6	67383.9	90202.6	84533	73368.3	71294	73221.1	279164	99084.4	72865.2	54369.8	58653.3	80978.1	109784	83739.6	38911.4	48079.7	43046.1	159523	102746	52948.5	97857.2	40234.6	29134.2	41765.2	67640.7	94325.2
1	PC (34:0)	762.6 -> 184.1	30069.9	28167.4	16536.3	54740.4	20705.6	25397.7	26867.8	38297.2	41155.9	22863.5	28683.2	26113.1	37318.5	33926	40472.6	46126	30423.3	61736.3	40741.2	48828.6	29368.3	20537.4	26750.4	27848.5	20486	20099.7	26506.6	130558	31909.7	23352.3	17996.9	19107.8	27423.7	35398.2	28112.1	13875.5	18218.1	17508.4	51031.1	29767.5	16997.7	29939.8	12760.7	9034.4	16521.5	20483.4	26521.5
1	PE (38:5)	766.5383 -> 625.5383	9636.04	9673.7	3962.34	15257.4	4834.46	7867.24	3996.8	5847.52	4594.18	2405.24	2880.76	8829.7	12678.3	1889.26	4888.68	7297.7	4315.58	6984.06	9280	3901.64	5128.6	3964.8	3441.9	2637.08	4454.72	3522.1	1956.82	5634.74	7159.2	4600.6	4732.9	5870.18	7824.88	5982.3	8732.64	3936.56	2682.7	2203.3	7963.58	6064.46	3940.76	9798.72	4419.96	3366.1	2862.8	3321.96	4230.34
1	PCo(36:5)	766.6 -> 184.1	2933.38	2328.52	2281.26	3725.36	1863.4	3381.86	2110.24	3235.98	4882.98	1853.62	2932.78	2129.88	3690.1	2467.06	3627.18	3657.46	3081.48	4990.9	1924.8	4443.1	2488.92	1688.16	3343.36	2273.1	2060.18	2284.6	1886.36	5961.98	3164.84	3397.78	2238.32	1585.9	2858.54	3079.08	2163.06	1415.26	2028.24	2048.74	4521.5	4340.42	2743.4	2692.72	2603.24	1583.28	1543.84	1846.08	1975.26
1	PE (38:4)	768.5539 -> 627.5539	40781.9	35295.9	12193.8	54016.4	20078.3	41077.4	13816.1	29119.2	22016.1	10201	19903.4	40559.1	55055.4	6383.82	26956.1	40623.9	21964.4	43936.6	30964.4	27390.9	27041	14508.7	12012.3	14420.3	24737.8	18666.7	10307.7	33481.6	28296.4	19159.5	16019.2	17396.1	35233.1	26767.9	35767.7	14586	13001.1	6007.18	39868.4	38208.8	15396.6	35149.8	17070.1	11205.7	9899.06	16733.6	16516.5
1	PCo(36:4)	768.6 -> 184.1	6188.06	5044.16	2802.22	7328.36	3488.54	5751.74	3946.3	6717.8	9817.44	3850.9	5831.4	4254.04	7580.44	8230.3	7082.92	9220.78	5738.58	7715.34	4701.64	6516.58	4293.74	4021.92	7087.1	4210.02	3176.18	4234.64	3993.54	12799.3	6778.5	5489.08	3579.52	3945.4	5790.18	6408.14	5310	2974.64	3846.62	3452.2	9581.92	7359.32	3848.86	3619.62	3440.72	2135.44	5646.18	3725.8	4968.84
1	PE (38:3)	770.5696 -> 629.5696	10288.7	9289.62	3738.4	16323.5	6988.22	9355.14	4846.06	8624.16	6810.12	3939.8	5096.06	9879.62	10994.5	2555.64	7991.82	10050.7	6692.86	10313.3	8930.5	7213.78	8580.12	5391.2	4654.96	4145.6	7106.4	5522.92	3781.88	6671.54	7320.24	5527.72	5927.76	5745.58	9433.8	7790.2	7441.66	4615.18	3602.68	2327	11203	8087.24	5564.88	8411.82	4644.06	2997.58	3067.84	5085.44	5270.94
1	PCo(36:3)	770.6 -> 184.1	6603.98	5057.4	2821.92	8595.78	3835.94	5746.7	3490.12	4523.84	6760.84	4239.64	7641.52	3993.84	5712.8	15870.1	6168.88	7262	4735.96	6062.04	5485.26	5256.7	2858.46	3195.34	4516.84	3188.62	3119.6	3428.16	2520.1	13673.7	8504.6	4386.82	3083.6	3492.22	4879.8	5456.66	3848.56	2746.5	3091.64	3432.26	6966.22	5490.42	3349.96	4564.5	3346.32	2182.94	4797.34	2291.42	5418.18
1	PE (38:2)	772.5852 -> 631.5852	4247.36	3658.12	2136.76	6198.36	2687.78	2900.16	2990.14	3843.98	3073.44	2452.46	1717.06	3326.24	3633.82	1512.2	1927.9	3372.26	3031.48	4063.72	3834.04	2176.92	3071.86	2627.02	3028.7	1494.82	2629.32	2702.1	1891.2	2109.62	2560.22	2175.14	2193.68	2350.04	4035.96	2347.44	3231.82	1897.84	1646.54	1542.44	3221.42	3507.46	2359.26	3535.14	2168.14	2000.64	1710.4	2151	2791.26
1	PCo(36:2)	772.6 -> 184.1	18144	17248.1	7169.92	25320.8	10551.9	12686.7	12246.2	17602.3	14091.2	11134.4	15277.4	14020.9	13981.6	49134.7	24460.2	16442.8	12145.4	22885.4	18399.3	12717.2	17093.5	12101.8	19106.5	8051.78	12335	12895.7	6859.4	31251.3	16566.4	11370.1	10690.5	8049.18	13366.1	12229.8	10118.5	7077.88	5753.84	6365.6	16770.1	12744.7	8267.7	11884.7	8582.38	6345.52	24473.5	9874.24	19286.5
1	PC (36:8)	774.5 -> 184.1	17786.5	19050.4	7731.42	21385.6	15301.5	12431.7	14393	22299.1	12842.1	12557.2	12594.9	19589.6	15726.4	32910.6	20194.2	16220.3	14905.5	25783.2	25063.9	15610.3	24180.9	13386.7	16831.9	13018.3	11038.4	12600.4	8794.54	24534.3	15280.1	12328.3	9953.9	7691.74	14769.4	12688.3	9251.42	7871	5890.58	5383.32	17141.6	13769	8900.46	12932.8	6976.68	5900.98	14328.1	10073.4	17090.9
1	PCo(36:1)	774.6 -> 184.1	22656.4	20186.8	7376.6	24411.3	17317.4	12905	15335.5	24865.2	14840.4	14813	14211.6	21065.8	17247.7	34221.6	23856.9	18515.7	16426.3	30281.7	28455.4	18729.3	25738.9	14320.7	22716.3	15745.7	13405.9	15493	10782.3	29518.8	16724.5	11906.7	13542	9259	15220.6	14623.9	13122.5	8647.26	5802.8	6771.5	20599	13323.5	9827.28	16380.1	7858.92	6449.16	16322.6	10721.3	19340
1	PC (36:7)	776.5 -> 184.1	3114.64	3175.62	1851.1	4072.7	3295.64	2882.88	3351.94	4174.3	3649.24	3343.48	4151.2	3170.78	3487.6	6900.76	4476.1	4164.52	3586.88	5205.24	4512.46	4868.8	4459.7	2986.3	3705.7	3704.12	2733.66	3025.02	2905.54	4907.52	3159.5	3145.38	2729.16	1849.2	3019.42	3159.96	2460.14	1819.76	1808.74	2151.42	3578.08	2813.86	1918.18	2486.36	1632.56	2101.86	3070.34	2223.64	3045.62
1	PS (36:8)	776.5801 -> 591.5801	2033.18	2236.74	2571.9	3399.08	2437.06	2334.34	2822.76	3376.34	3296.3	3543.38	2772.5	2889.7	3352.42	2966.96	3622.18	2218.28	2800.42	2877.14	3422.52	2812.66	2877.68	2580.44	2606.02	2585.84	2318.76	1945.86	2053.66	2635.72	2628.32	1876.46	2285.28	2647.12	2309.08	2402.66	2165.06	2559.6	2254.54	2446.36	2847.66	3390.32	2327.98	2923.84	2211.56	1994.68	1924.42	2320.14	3146.32
1	PC (36:5)	780.6 -> 184.1	2105	1761.28	1859.94	2792.46	1158.46	2523.8	1548.64	2213.16	2169.1	1539.64	1982.44	2353.52	2825.68	1843.28	2018.74	2780.54	1809.68	2854.88	1655.98	1949.02	1815.66	2022.84	1808.58	1445.48	1738.76	1719.14	1361.02	6116.84	2287.22	2253.8	1673.38	1616.66	2095.48	1678.98	1931.64	1436.88	1523.66	1488.5	3035.48	2577.12	2114.14	2239.4	1660.4	1277.94	1553.2	1581.16	1796.68
1	PC (36:4)	782.6 -> 184.1	33194.3	24965.8	13958.9	39350	13799.7	27621.7	13529.3	24626.5	34312.6	10632.2	20804.9	25940.5	40657.6	8362.72	24719.2	36429.5	19315.7	38481.2	24402.6	22264.1	17364.2	16687.9	17872.3	12337.9	15036.9	16861.9	7072.08	80113.4	22855	23455	14926.9	15553.3	25830.6	22050.2	23405.5	8743.48	12271.1	7222.08	39614.2	27762.9	19098.3	28706.3	15886.8	7446.18	10822	14505.4	17744.4
1	SM (d18:2/22:1)	783.6 -> 184.1	17323.8	13351.3	7472.88	20257.8	6367.4	14386.2	6999.5	11054.9	17486.3	6111.5	10392.6	11513.8	20623	5738.94	12735.3	19317.8	10118.9	17763.1	11618.6	11717.1	9348.56	7469.58	9505.62	5791.02	8290	8390.48	4677.48	36806.8	13047.4	12164.1	7465.58	7294.8	12451.5	11454.5	11754.7	5149.04	7452.08	5256.46	20122.9	16155.5	8251.68	13656	9189.98	4336.56	5514.74	7301.62	8020.46
1	PC (36:3)	784.6 -> 184.1	82340.8	65730.8	27898.3	116109	30414.2	51275.8	31203.2	54513.5	73152.9	30976.1	37686.8	55971.4	82228.7	19717.4	53167.7	89985.8	44680.5	89095.2	71277.2	49287.3	47135.6	34433.5	47689.5	21443.8	37045.8	40854.2	15567.7	98972.1	53485.9	48566.7	38559.5	30108	71061.8	49159.8	47890.1	19925	29167.7	13219.9	68770.9	59281	40111.2	63562.8	31937.7	16365.2	20614.5	38438	49582
1	SM (d16:1/24:1)	785.6 -> 184.1	37664.2	32380.9	14312.4	52484.5	14382.2	23592.8	16690.3	26571.4	34813.4	15371.8	19817	25204.2	38722.6	12479.3	30694	43894.3	23254.5	45947.9	31868.2	27024.3	24861.3	16723.8	24739.4	13068.4	18357	20524.3	10787.4	48662	25677.4	24218.7	18476.5	15280.2	31950.6	24397.2	24534.3	10132.9	14692.2	8122.16	32812.5	29446.8	19677.3	27385.9	15957.2	7406.44	12454.2	19196.2	23569.5
1	PC (36:2)	786.6 -> 184.1	220723	177117	85775.6	301646	101459	170380	111092	194347	248686	107616	142578	161955	229297	81745.9	185841	297490	173657	336493	217208	241549	176644	112939	147373	90318.1	143089	143403	72889.1	315446	144509	146518	116926	85572.9	196704	175989	152343	62495.7	79330.6	39960.6	221116	208811	103581	163028	84038.1	45849.1	78526.3	120768	150633
1	SM (d16:1/24:0)	787.7 -> 184.1	114823	95966.5	46997.2	164093	57958.4	88955.6	64105.4	113262	134506	56724	78428.4	90795.4	118405	57289.5	98522.3	154515	89522.9	188232	107617	146122	93659.4	61067	82085.1	57640.2	76311	75281.9	49276.3	187445	82044.7	84680.3	61405.9	47448.3	97617.7	101124	83839.3	34863.9	45254.4	28528.8	125929	113809	55005.3	84452.3	45931.8	24738	44002.4	63697.3	82870.9
1	PS (36:2)	788.5437 -> 603.5437	6774.6	6943.32	3655.04	8290.58	3433.2	6277.34	3154.2	5079.7	4837.8	4417.84	4516.38	6075.5	6801	3148.94	4134.3	6036.32	5782.4	5021	4061.3	3495.4	4756.46	4626.58	3610.44	2321.56	3398.76	3573.54	2384.5	9562.88	3627.58	3412.74	4513.1	4570.32	7354.22	6879.84	6669.54	4341.68	2731.98	2248.72	4943.58	6181.34	3798.6	5205.74	4396.18	2423.4	2590.88	2781.58	3667.9
1	PC (36:1)	788.6 -> 184.1	162659	143489	69317	201386	96528.7	136651	99455.5	193595	201801	102242	126375	153410	156238	91538.6	149273	209207	155662	332298	178288	230708	174577	94135.4	134138	117036	110860	124222	90289.3	288869	112413	116417	95662.5	71307.6	138515	160646	120880	56346.5	59260.5	46535.2	197166	168694	82839.5	111146	60992.4	39374.2	76952.9	87965.3	133110
1	SM (d18:0/22:0)	789.7 -> 184.1	67641.5	60577.6	29317.1	88804.6	40473.7	57980.3	44425.7	75781.8	81111.3	49703.9	54195.6	65244.1	64859.6	39154.9	60925.3	84341.5	66767	141136	74780.5	101724	75745.7	38553.5	55576	51186.2	48183.7	52632.6	38139.1	127465	46759.6	49207.5	43965.3	31324.2	61265.8	68468.9	47781.4	20221.3	23200.3	20304.7	79482.3	68376.6	33546.3	48008	25524.4	16202.1	34361.7	36277	55183.4
1	PS (36:1)	790.5594 -> 605.5594	48363.3	50680.9	27776.4	75049.4	34761.6	43180.2	29227.2	46703.9	42773.5	31596.7	41191	45220.6	47840.3	30424.8	42156.8	44728.1	46931.8	63153.9	53500.7	41562.8	50587.5	37143.1	37528.2	33187.7	33804.9	30309.1	22822	46146.3	35165.6	33765.2	34682.9	32764.5	43338.4	45427.2	43543.1	32603.1	22931.3	18344.4	42603.4	45718.6	22810.9	34781	25688.8	16778.5	15705	21953	36140.8
1	PC (36:0); PCp(38:6)	790.6 -> 184.1	15357.7	14597.6	7391.14	17394.2	10513.3	12724.6	10437.9	16465.7	18177	10156.5	13509.4	14718.8	15113.8	11267.9	14793.4	19508.2	15125.8	26796.7	17960.9	21882.3	16194.2	9934.8	13159.4	10551.8	10748.5	12045.8	10662.4	27709.9	10721.3	12578.3	9199.2	7369.92	13379.4	15577.6	10887.2	6677.2	6744.46	5406.72	18151.1	13654.6	7168.56	10837.1	7236.38	4780.84	7333.06	9583.32	11665.2
1	PSp (38:6)	792.5175 -> 607.5175	5560.02	6107.88	3310.22	7732.4	3885.58	5192.66	3441.72	5736.78	6248.44	3951.04	4910.08	4490.64	4295.68	3230.2	4619.7	5509.8	4449.46	6526.98	7001.34	4806.84	5110.08	4018.84	4547.18	4075.98	4131.9	3693.64	2855.56	4582.12	3745.24	3837.82	4262.96	3734.9	4822.24	4964.1	5064.34	4542.04	2815.38	3152.14	4750.56	3905.56	3388.86	4261.12	3164.72	2578.08	2712.18	3217.38	3946.92
1	PS (36:0)	792.575 -> 607.575	5204.06	5520.26	3760.4	7080.26	3080.9	5402.34	3951.18	5517.8	5212.88	4063.6	4205.72	4751.1	4711.2	4062.44	5310.24	5267.58	5004.4	6975.1	5790.42	4792.42	5915.6	4602.64	3741.52	4710.44	3945.32	3761.02	3016.62	4671.04	4559.42	4185.98	5338.42	3275.74	5212.66	4930.3	4951.98	4302.78	2998.36	2777.74	4730.7	5281.22	3411.42	3848.18	3836.76	2741.3	2682.5	2974.92	3960.66
1	PCo(38:6)	792.6 -> 184.1	2199.32	2414.22	1456.66	2772.86	1536.82	2406.66	1967.32	2781.84	3781.08	1880.72	2402.92	2301.66	2989.62	3047.6	2336.06	3463.14	3006.9	3588.7	2950.66	3317.2	2458.42	1686.26	2484.36	1950.96	2021.08	1996.66	1808.8	4644.14	2925.9	2335.1	2058.58	1842.22	2276.26	2122.12	2074.6	1725.16	1686.26	1893.32	2848.52	2783.56	1550.22	2575.98	1848.48	1358.16	2097.92	1989.84	2361.44
1	PE (40:5)	794.5696 -> 653.5696	4016.76	3982.64	2111.88	6501.2	2153.7	3451.92	2256.3	3714.4	2335.12	1901.44	2210.74	3941.74	6028.54	1427.1	3713.94	4878.4	2754.84	5517.46	4764.62	3099.12	2709.12	2113.9	2592.26	1594.58	2892.9	2407.78	1884.96	3423.12	4377.94	2608.32	1859.68	2743.82	3179.38	3305.16	2820.22	2007.38	2296.96	1847.46	4295.18	3683.36	2132.24	4345.34	2573.52	2098.94	1729.26	2535.12	2475.52
1	PCo(38:5)	794.6 -> 184.1	5484.54	4910.4	3207.8	8611.8	2499.48	5821.32	3414.92	5007.72	6649.44	2995.42	4584.66	3469.54	7766.96	4282.04	6379.58	4864.5	4580.38	7152.86	4854.82	5495.8	2899.4	3724.14	4145.84	3287.34	2875.06	3673.6	2578.52	9565.82	7023.04	5039.5	3097.6	3526.96	3999.1	5856.42	4607.34	2531.34	3567.12	3500.74	6867.78	4623.16	3160.48	4907.76	3794.32	1942.32	3939.26	3829.54	3431.26
1	PE (40:4)	796.5852 -> 655.5852	4825.54	4549.94	1922.32	9756.96	3096	4009.22	3015.76	6129.08	3719.04	2121.46	2525.5	5439.72	6901.68	1822.02	3963.08	6211.96	2646.42	7280.8	5899.02	3750.66	3328.96	2507.54	3821	2671.08	2563.34	3007.04	2383.68	2965.88	6181.6	2785.12	2982.12	2546.24	4072.42	4000.76	4586.28	2917.86	2327.22	1881.12	5042.1	4890.54	2650.92	5534.76	2679.34	2296.54	1867.86	3260.36	2737.84
1	PCo(38:4)	796.6 -> 184.1	6018.38	5080.84	3299.04	9732.26	3262.08	6114.16	4320.14	6652.82	6988.28	3777.84	4881.02	5516.32	7171.74	8841.72	8335.56	7715.86	4943.36	8913.82	4818.7	5158.46	4681.84	4353.8	6486	4750.1	4659.96	4406.66	3395.14	13026.6	7837.66	5657.12	4073.88	4054.66	4528.22	6837.54	4780.2	2812.62	3899.24	4339.76	8767.68	6556.34	3163.62	4908.96	3479.4	2413.44	10426.2	4005.26	5658.62
1	PCo(38:2)	800.6 -> 184.1	3379.66	3092.62	1982.36	5285.5	2122.84	3430.84	3099.38	4750.12	3673.16	2849.42	2972.18	3196.34	3903.98	4576.9	4795.68	4226.64	3466.02	5217.26	3708.7	3753.74	3418.08	2388.92	4272.72	2785.4	2477.3	2344.38	2835.1	4984.02	3361.02	2895.1	2867.1	2192.82	3712.48	3584.12	3038.04	2193.12	2029.92	2241.48	3481.9	3552.66	2420.7	2618.42	2066.3	1598.34	2963.12	2415.22	3295.12
1	PC (38:8)	802.5 -> 184.1	4409.44	4571.32	2492.32	5324.8	3864	3914.76	4003.1	5539.28	4599.3	2994.54	3922.44	4544.08	4957.68	4915.04	4779.72	4272.54	4165.58	7359.38	4444.18	5097.4	4665.48	3678.3	4257.2	4056.6	3589.04	3680.12	3773.58	7078.78	4302.16	3260.5	3052.72	2565.78	4512.06	4038.64	3706.92	2151.74	2520.22	2145.92	5373.4	4770.4	2808.32	4150.16	2652.58	2073.38	3151.88	2994.72	3522.38
1	PE (40:1)	802.6322 -> 661.6322	2649.62	2764.76	1771.7	2981.36	1571.82	1799.64	2057.26	2153	1236.94	1417.94	1170.14	2205	1809.46	1269.4	1476.14	1186.2	1631.3	1516.78	1798.8	1249.96	1976.64	1668.64	1545.76	1368.06	1725.2	1412.14	1470.3	1532.38	1864.78	1323	1918.12	1694.18	1996.16	1700.68	1964.7	1635.22	1206.68	1265.98	2355.4	1556.66	1590.44	2222.38	1603.86	1396.78	1275.48	1459.36	1205.12
1	PCo(38:1)	802.7 -> 184.1	6498.06	5294.4	2727.04	6503.88	3785.34	4472.02	5190.82	6296.8	5804.92	3874.76	4972.92	6024.22	5620.04	6654.8	6022.88	5928.36	5161.64	7879.24	5307.58	7443.38	5778.68	4739.6	4708.82	4149.56	4061.82	3262.7	4233.48	9466.42	4958.32	3573.76	3458.9	3473.24	4278.34	6200.84	4445.54	3006.82	3192.08	2964.92	5580.86	5695.7	2497.02	4436.04	2458.28	1565.82	3737.44	3181.66	5120.46
1	PCo(38:0)	804.7 -> 184.1	2028.12	1660.58	1584.54	2510.74	1520.06	1839.04	2273.3	2292	2495.94	1841.5	1908.86	1814.6	1569.48	3001.96	2777.22	1953.54	1856.94	2875.74	2028.64	2205.24	2180.46	1998.14	2274.62	1828.36	1682.2	1650.52	1807.68	3703.22	2766.54	2195.38	1709.16	1314.94	1898.76	1787.14	1826.08	1419.58	1544.06	1544.9	2415.76	2233.78	1687.12	2452.82	1488.88	1978.3	2086.76	1619.66	1965.18
1	PC (38:6)	806.6 -> 184.1	6927.8	6382.76	4036.36	6735.36	2971.52	5763.62	4455.18	5868.04	5794.84	3139.94	3794.48	6350.96	8453.78	2894.28	4266.48	4997.08	4048.78	7924.06	5226.74	5718.64	4340.34	3874.72	3818.26	3794.22	3419.58	4076	3052.04	10665.2	5039.74	4364.12	3747.68	3391	6304.3	6140.9	6005.86	2639.94	3653.6	2306.64	7857.62	5587.3	4184.56	5568.72	4251.66	2191.18	2895	3491.96	3793.36
1	PC (38:5)	808.6 -> 184.1	13748	11443.6	6184.68	13765.7	5687.26	13022	4535.56	9520.5	11798.3	4673.96	7831.36	12134.1	18709.7	3100.14	9851.6	13055.7	6476.46	13812.5	9430.12	9224.6	8120.1	6121.7	6299.3	4733.96	6557.02	5283.84	3363.86	18366.8	11808.3	11184.9	5452.42	5978.32	10741.5	10543.6	11193.8	4776.16	6886.5	4027.5	13454	11142.4	7347.92	11019.8	6286.6	3973.6	4333.84	5072.98	6608.24
1	PC (38:4)	810.6 -> 184.1	26865.7	20006.3	14253.9	34681.9	10760.8	27589.5	12363.7	26416.5	37720.4	12185.3	24958.3	24708.6	44923	8375.42	24982.1	37807	20679.9	41387.4	26200.4	26351.6	16069	12810.6	17303.8	12354.4	14778.5	14903.7	9408.54	51258	26376.4	27382	11890.2	12496.7	24273.1	28710.8	26127.9	11175.7	12982.2	7949.46	38981.4	32060.6	13103.3	25230.4	11435.9	6485.3	10221.3	15196.7	14514.5
1	SM (d18:2/24:1)	811.7 -> 184.1	18229.4	14984.9	10793.3	23265.3	9716.24	16983.3	10434.2	17577.4	25959.2	9458.48	17559	14856.3	29128.3	17022.3	21674.3	28192.1	15380.2	31723.3	18032.2	24678.4	13421.8	8652.92	14100.5	11470.2	10243.8	11078.9	9995.48	34114.3	18302.4	18871.2	8914	10654.7	17438.3	22342	18419.5	7439.14	9037.26	7732.96	27451.8	18005.2	8814.54	16506.8	7933.48	4901.74	10915.2	11220.9	12765.4
1	PG (38:6)	812.5172 -> 623.5172	1215.9	1064.14	1051.96	1044.32	1089.58	1200.12	1124.08	1082.4	1090.1	1042.8	1267.28	1096.94	1027.98	1140.84	1070.5	1152.96	1028.44	1028.62	1066.86	1093.16	1080.86	1070.54	1086.72	1034.26	1055.22	1024.98	1032.8	1011.68	1051.96	1035.4	1032.54	1105.96	1172.08	1116.02	1109.12	1029.28	1014.9	1112.84	1205.42	1072.66	1128.26	1076.76	1059.8	1066.12	1027.9	1013.56	1228.98
1	PC (38:3)	812.6 -> 184.1	15054.8	12147.5	7548.46	22412.5	7225.7	11790.4	8344.44	15412	18258	8787.52	12877	13259.8	19007.3	9450.56	18452.5	24224.8	12780.3	25672.1	17075.4	18305.7	11663.1	8427.04	12638	9198.16	10542.5	9858.58	9203.4	25993.5	11534	11825.5	7973.76	8543.06	12867.2	15400.1	13246.2	6253.1	6911	5665.24	20080.9	15715.1	7578.52	13307.9	6088.84	4385.42	7221.56	11671.4	10747.3
1	SM (d18:1/24:1)15Z))	813.7 -> 184.1	26057.7	34681.6	14683.8	45908.4	17652	24121.9	23432.6	32333.8	32894.9	21617	24017.8	19851.4	33016.4	75995.9	50796.6	42738.1	25572.8	59251.7	27493.5	46703	24847.3	16808.6	29169.5	26263.8	18426.1	18425.9	26423.1	54283	34520.4	23486	15276.9	17346.7	21147.8	39487.8	26220	12101.5	15068.2	21656.3	41342.8	25208.1	11102.8	23597.6	11339.2	10012.3	33330.5	19280.7	32349.7
1	PC (38:2)	814.6 -> 184.1	16645.9	18740.2	7796	25559.3	9847.4	12289.5	12996.4	18662.2	21454.1	12482.4	12833	11367	16553.1	33118.5	23783.5	23924.4	15373.4	34616	17559.8	24343.7	16227.5	9377	14468.5	12702.6	11019.6	11945.5	14078.6	24254.6	18488.4	13484.8	10059.3	9434.84	14479.2	18820.3	14431.4	6949.28	8128.64	10234.3	21033.9	15734.8	8128.8	13396.2	6246.04	5673.42	15028.1	11288	17331.2
1	SM (d18:1/24:0)	815.7 -> 184.1	27378.5	31039.8	12571.2	39037.3	14656.4	20047.8	24274.2	34877.2	31372.3	18308.1	23033.2	24348.4	27006.5	36842.8	34408	34648.5	24854.6	47986.2	28967	49131.7	26154.8	19858.1	27719.6	24310.3	19491.5	19615.2	27599.9	54269.7	22615.7	19312.5	16947.8	15618.9	20535.5	28307.8	23256.3	10199.1	13038.8	12581.5	33797.3	27301.9	11464.9	22712.5	11194.8	7531.14	21819	15099.5	23910.5
1	PC (38:1)	816.6 -> 184.1	12657	13659	6541.38	17649	8457.56	9055.24	11477.8	15331.6	14868.8	8762.8	9713.12	12078.4	11819	15262.7	15565.3	14621	11370	21664.6	15075.8	20173.3	12342.7	9110.96	11450.9	10514.8	8137.16	9198.12	11692.3	23681.3	10452.1	10616.4	8177.36	6536.14	10562.1	13285.1	10474.4	5786.76	6428.96	7592.62	15098.4	12412.5	5134.14	9729.98	5520.74	4376.82	8140.04	7596.6	10381.6
1	SM (d18:0/24:0)	817.7 -> 184.1	5194.02	6448.44	3417.78	9190.68	4018.98	4157.06	5764.28	6947.88	6243.18	5210.58	5056.46	5592.64	4751.92	9479.94	6852.74	6567.7	4799.78	10150.1	6772.08	8514.36	5971.28	4979.26	5626.74	5433.32	4000.24	5711.82	5231.1	10312.1	5325.14	4785.32	3916.12	2687.72	4512.8	5421.98	5295.52	3009.14	3038.82	3188.34	7710.4	5204.18	2614.48	4520.72	3395.44	2318.34	3701.92	3323.36	4801.7
1	PS (38:1)	818.5907 -> 633.5907	4148.36	3531.08	2587.38	4835	3019.02	3683.04	2897.62	4941	3049.88	2302.16	2705.32	3569.16	4232.72	2559.6	3187.78	3723.08	3482.74	3546.9	3278.68	3399.26	4557.04	3435.42	3472.72	3609.34	2695.34	3236.02	2369.28	3475.2	3167.94	2745.36	2881.78	2783.82	3792.38	3398.08	3503.12	3320.58	2042.34	2053.56	2615.4	4082.14	2264.64	2827.36	2605.56	2058.86	1862.1	2497.78	3280.38
1	PC (38:0)	818.7 -> 184.1	3175.94	3393.62	2397.94	4904.6	2253.62	2651.14	3314.18	3166.18	3084.26	2828.18	2266	3727.26	3044.24	4047.36	2894.44	3336.88	2453.5	4539.6	3918.44	5010.84	3381.9	2345.94	3185.86	2754.6	2213.64	2472.32	2872.34	5504.68	3203.06	2665.22	2151.7	2697.26	2515.58	2861.96	2659.56	2005.64	1623.74	1811.18	4246.34	3451.72	1955.54	3248.14	1647.9	1596.38	2474.38	2413.26	3022.2
1	PSp (40:6)	820.5488 -> 635.5488	1576.36	1963.54	1582.6	1624.94	1376.56	1481.64	1486.48	2215	1943.06	1549.86	1639.82	1915.48	1969.5	2093.78	1773.94	1599.96	1938.06	1962.66	1886.12	1799.52	2020.82	1526.1	1431.18	1475.84	1514.02	1691.06	1547.48	1453.96	1340.82	1377.82	1406.04	1321.3	1247.3	1702.98	1553.24	1375.68	1672.1	1760.14	1949.54	1750.32	1388.2	1703.88	1502.62	1129.84	1657.14	1441.28	1873.2
1	PCo(40:6)	820.6 -> 184.1	2803.16	3423.34	2513.22	4173.88	2542.06	2630.34	3638.76	4115.26	2887.78	3192.9	2473.62	3304.36	4019	2846.64	3948.96	3288.76	2815.42	4123.28	3376.96	3911.54	3799.08	3193.66	3233.7	3471.86	2588.28	2352.16	2652.96	4130.92	3776.52	3236.32	2846.36	2525.06	2914.8	2873.62	2420.62	2167.3	1931.14	2741.44	4363.94	3235.32	1757.46	3414.94	1594.06	1510.64	2627.04	2888.56	3059.84
1	PCo(40:4)	824.6 -> 184.1	1744.6	1707.52	1697.64	2360.14	1655.1	1725	1750.04	1858.96	2041.6	1325.76	2213.4	2320.18	2128.7	3089.66	2387.42	2592.12	1872.34	2282.72	2181.42	1848.24	1931.68	1861.32	1731.9	1720.44	1466.58	1611.32	1699.24	2733.42	2128	1793.76	1725.74	1607.82	2032.4	2338.58	1740.98	1412.3	1280.18	1364.56	2178.52	1857.84	1525.56	1795.14	1268.72	1460.22	2542.08	1880.7	2249.3
1	PC (40:8)	830.6 -> 184.1	3277.44	3601.74	2018.84	3406.14	2592.72	2331.3	2971.94	3438.78	2587.32	2344.26	2758.06	3114.18	2861.44	3297.2	2814.46	2902.46	2878.84	3419.56	3800.16	3265.4	2822.86	2334.36	2301.66	2458.72	2056.86	2371.64	2006.66	3946.78	2750.56	2471.9	2081.98	2253.6	3136.8	2256.04	2094.56	1770.82	1994.12	1465.78	3384.88	3023.12	2171.2	2289.16	1746.4	1594	1772.66	1831.44	2850.14
1	PC (40:7)	832.6 -> 184.1	4054.88	5911.12	3149.32	6092.74	3481.42	3430.98	4674.7	6506.94	3863.96	3410.2	3263.04	4214.4	4845.3	3168.54	4406.7	4114.44	4084.7	7154.14	5488.36	5040.94	5150.14	2953.06	3319.16	3274.12	3018.94	3356.62	3507.92	4834.06	3893.44	3400.9	3427.9	2490.14	4480.5	3700.88	3740.26	2465.22	2410.44	2658.94	5891.78	3531.52	2393.82	4392.74	2749.82	1773.98	2670.22	2625.1	4507.62
1	PC (40:6)	834.6 -> 184.1	4912.72	6691.16	3196.74	7828.24	3665.62	4983.06	5157.66	6707.42	5773.5	4261.76	3648.22	5868.1	6549.92	4011.8	4731.04	6006.22	4437.52	7456.32	6118.76	5332.92	3371	3423.8	4159.42	4042.46	3378.06	3646.4	3193.02	8622.4	5404.7	5185.16	4129.22	3135.2	5613.04	5183.42	5484.56	2479.84	2889.66	2819.12	6147.14	4786.22	3269.32	4793.1	2661.7	2485.42	3112.88	3583.28	4606.2
1	PC (40:5)	836.6 -> 184.1	3591.34	3335.76	2875.88	5427.6	2558.04	4182.72	2656.94	4426.72	5605.32	2694.1	3686.34	3342.96	7094.28	2040	3457.18	6086.06	3611.86	5662.86	4485.62	4507.56	3107.92	2416.02	3683.3	2746.36	2981.12	3115.06	2392.52	6480.94	5015.94	4628.92	2381.94	2739.78	4578.66	5051.12	4569.28	2519	3010.52	2619.2	5048.2	5055.52	2878.04	4072.02	2548.04	1805.74	1777.2	3173.26	2330.5
1	PC (40:4)	838.6 -> 184.1	3522.62	2681.68	2461.14	5502.92	2686.12	3783.48	2527.18	3717.42	4576.82	1873.7	3035.48	3867.6	4641.14	1744.78	3465.9	5150.24	2941.24	6336.74	4328.32	3745.48	2320.3	2116.32	2676.68	2306.56	2459.56	2840.18	2217.36	4135.36	3860.42	4113.4	2027.62	1937.3	3475.64	3618.34	2798.16	2017.74	2333.8	2142.74	5995.96	3929.28	2005.62	2932.96	2251.32	1816.8	2356.44	2590.74	3143.82
1	PC (40:3)	840.6 -> 184.1	2101.94	2041.16	1569.74	2538.38	1150.44	1997.08	1657.14	1884	2185.02	1522.56	1979.62	1941.26	1782.44	2280	1777.04	2911.38	1691.26	2754	2143.2	2367.42	2027.98	1519.3	1672.28	1463.96	1662.8	1891.6	1591.48	2576.18	2461.2	1399.24	1555.52	1791.58	1653.52	2004.98	1566.56	1348.4	1188.08	1425.32	2102.38	1664.36	1810.24	1883.8	1417	1366.66	1756.82	1602.8	1749.52
1	SM (d18:1/26:1)17Z))	841.7 -> 184.1	1974.12	3619.14	2106.6	3925.28	2048.02	2340.9	2951.86	2617.16	3177.78	3055.64	3170.4	2608.52	2433.76	8952.98	3297.8	2971.94	2516.2	3654.84	2547.82	4148.4	3020.8	2148.08	1963.86	1561.64	2037.1	2288.22	2346.88	2913.48	2795.34	2348.56	1886.2	1719.96	2012.7	2663.26	2773.9	1391.58	2047.5	2360.66	3525.86	2439.48	1951.04	2203.92	1580.12	1505.66	2611.82	1535.38	2778.04
1	PC (40:2)	842.7 -> 184.1	3081.56	2712.16	1615.24	3099.46	1771.12	2565.92	2139.64	2653.18	2476.06	2158.24	2835.96	2554.62	2308.2	5086.02	2873.2	2897.82	2113.4	3445.38	2929.54	3626.66	2897.18	1868.5	2171.42	1748.26	1951.86	2008.9	2048.34	2882.42	2287.88	1936.64	1560.22	1846.36	2172.38	1915.2	2170.46	1521.36	1476.06	1533.14	2840.78	2107.94	1837.58	2069.42	1586.86	1567.68	2372.12	1772.38	2295.02
1	SM (d18:0/26:0)	845.7 -> 184.1	2900.44	3508.28	1870.84	3138.52	2489.96	2012.02	2849.62	2799.5	2725.46	3299.24	2758.02	2708.36	2769.42	4335.92	2630.84	2588.9	1977.12	3156.32	2868.08	3129.94	3058.8	2282.94	2173.2	2126.56	2098.06	2145.54	1944.1	2749.96	2969.48	2079.12	2436.26	1659.12	2016.02	2095.46	1892.7	1743.62	1400.9	1784.9	2600.66	2777.2	1828.28	2050.54	1514.96	1636.3	2703.28	2214.6	2495.64
1	PI (34:2)	852.5332 -> 575.5332	4255.46	4421.94	2673.56	5161.8	2652.42	3184.12	4463.66	4226.9	3772.52	3209.58	2366.98	3475.18	3355.8	4475.88	3491.46	3286.84	3385.52	4412.68	3088.54	4867.5	3384.16	3333.04	2121.84	2910.7	2045.1	1758.68	1950.96	1814.38	2922.92	2700.58	2662.96	2344.62	4303.5	2684.7	3330.3	1982.32	1803.84	2198.7	4207.86	3997.82	1679.94	2903.38	2080.72	2050.08	1604.28	2247.62	2378.2
1	PI (34:1)	854.5489 -> 577.5489	5865.5	5622.96	3393.3	7060.5	3551.26	4241.9	5265.46	6356.96	4145.96	4082.1	3597.94	4287.74	4743.56	8501.78	6429.26	3531.68	4108.4	6652.58	4732.52	7062.7	4133.88	3769.3	2754.98	4161.46	2580.4	2854.32	3483.82	3126.44	3485.38	3524.24	4164.46	3391.6	5146.36	4838.74	4752.84	2546.82	2827.68	2630.66	5815.92	5244.8	2070.16	4473.7	2026.24	2184.22	2893.48	2590.94	2726.86
1	PS (42:1)	874.6533 -> 689.6533	2425.18	4236.62	2285.7	4223.02	3703.9	2564.38	2712.84	3291.3	2915.62	2956.08	2954.28	2958.98	2883.96	2113.16	2044.44	2808.92	2944.54	2971.72	3558.98	2700.86	3468.16	2809.24	3421.28	2520.56	2683.64	2550.82	1991.4	3173.02	2563.46	2264.3	3432.22	2422.72	2971.12	3074.28	2906.9	2406.78	1902.78	1785.62	2321.12	2165.26	1771.76	3131.88	1896.08	1891.92	1956.74	2231.24	2982.94
1	PI (36:2)	880.5645 -> 603.5645	10117.7	13769.2	6075.16	14044.4	7177.44	9406.76	11045.2	11294.2	7200.98	10131	7016.62	10044.6	9125.78	11306.3	10458.3	10214.9	8601.12	17372.3	10012.9	15710.2	8293.88	7293.78	6442.84	7221.66	5327.44	5877.88	4335.48	2486.72	9521.78	8997.2	8098.06	5541.86	12927.6	9919.46	8627.64	4301.94	4651.56	4325.58	13552.7	8285.38	3586.58	8474.72	4567.64	3098.5	7007.78	5308.96	5204.64
1	PI (36:1)	882.5802 -> 605.5802	7759.48	10225.3	5078.8	11255.7	4843.88	6288.9	7798.82	8435.22	7044.08	7037.78	5509.84	7987.5	7122.12	11351.6	9068	5992.7	6976.3	14606.5	7703.96	9943.02	8170.6	5614.7	5419.24	6779.76	4114.1	4810.12	4189.74	3691.16	7220.12	6082.32	5038.22	3776.8	8260.88	8238.34	6541.8	3787.08	3760.58	4270.84	8809.4	6238.88	2925.62	6263.54	3472.08	3102.7	5243.26	3348.34	5731.68
1	PI (38:7)	898.5176 -> 621.5176	1045.42	1096.3	1077.62	1026.56	1034	1009.84	1041.9	1096.38	1021.56	1013.2	1028.56	1008.32	1030.8	1007.18	1027.94	1006.68	1113.76	1008.24	1152.16	1045.86	1029.88	1020.62	1040.04	1122.34	1003.6	1054.56	1021.16	1016.68	1112.02	1084.88	1050.2	1116.32	1070.14	1098.52	1021.56	1023.84	2070.28	1081.88	1090.44	1089.66	2071.66	1030.24	1679.78	1665.74	1072.12	1048.7	1156.5
1	PI (38:4)	904.5645 -> 627.5645	17707.1	15315.4	10908.2	26765	8690.46	20567.7	12255.7	18277	17471.1	11967.9	13075	16936.1	15074.1	9422.66	23843.7	18275.9	12725.2	28319.9	14545.8	28944.1	12454.1	8323.88	8043.34	11806.9	7268.58	7440.02	9485.64	3238.96	20494.7	15993.3	8551.86	9658.28	17337.3	18170.8	16606	7796.34	10375.5	10459.2	27871.3	18798.3	4069.66	15721.8	6604.02	4723.94	9261.58	7647.56	8438.52
1	PI (38:3)	906.5802 -> 629.5802	3154.86	3901.1	2910.76	8286.26	2988.58	3699.1	3227.82	4254.66	4142.98	2732.8	2858.94	4317.04	4117.26	3318.24	4984.04	5816.72	2777.2	6330.92	3966.02	7162.28	3463.88	2848.96	2906.44	2564.9	2936.78	2785.62	3519.38	1750.3	5525.14	3920.54	2385.32	2822.28	3920.6	4390.38	4181.96	2614.88	3126.86	2957.52	5804.8	4551.82	2149.5	3851.12	2591.78	1660.52	2686.7	2674.6	2797.28
1	PIo (40:6), PIp (40:5)	914.5853 -> 637.5853	2911.08	2459.4	2357.04	2823.56	2724.86	1668.72	3295.72	3726.1	2835.54	3164.64	2440.64	3862.54	3601.72	3328.22	3051.72	2964.52	3374.18	2359.94	3535.02	3469.5	4292.12	2900.56	2855.32	3021.86	3362.84	2551.9	2381.48	2497.8	2808.48	2941.64	2372.1	2803.7	2791.8	3046.52	2780.7	1893.14	1471.22	3908.24	3327.96	3192.28	1954.02	3419.94	1757.06	1911.86	4058.78	2405.2	3471.62
[truncated: 16 more columns]

## Sheet: Supplemental Table 4
Supplemental Table 4. Absolute Intensity for Method 2 (Harlow et al., 2019)
			HF																												IF
Method	Lipid name	MRM	3041	3044	3045	3046	3047	3050	3051	3052	3053	3055	3056	3057	3058	3059	3060	3061	3062	3063	3064	3065	3068	3070	3071	3072	3075	3076	3078	3081	3123	3124	3127	3128	3129	3130	3131	3132	3133	3134	3136	3137	3138	3139	3140	3141	3142	3143	3144
2		1025.0 -> 85.092	1948.98	1909.38	1955.58	1911.04	1918.36	1938.66	1874.4	1810.48	1921.92	1943.54	2006.74	1940.12	1948.06	1949.76	1959.06	1913.48	1943.66	1823.84	1926.44	1904.56	1931.68	2190.62	1995.1	1829.88	2009.48	1886.08	1981.9	1873.5	1939.08	1756.38	1895.04	1836.4	2004.9	1938.14	1923.24	2073.54	1937.56	2049.06	2097.64	2003.58	1911.82	1935.88	1852.52	1880.5	2099.84	1899.54	1873.72
2	TetradecanoylcarnitineO-tetradecanoylcarnitine	372.3 -> 85.1	10068.7	9902.88	7998.72	8421.54	7272.22	9824.68	11503.7	9998.58	9224.96	6693.62	7811	10516	7466.6	8839.54	9635.32	8946.36	8629.98	8072.34	7318.72	14272.5	7584.8	11346.5	7803.62	8890.6	7692.84	6995.1	6910.48	25007.5	8444.04	8039.54	8026.74	8464.32	10189.9	11923.4	5666.72	7125.66	5528.84	12295	11640.5	8855.38	8690.82	8019.42	6091.88	5847.96	9498.18	10075.6	5840.4
2		404.4 -> 59.092	21547.5	13402.1	22761.1	16369.8	22362.4	23250.1	22496.5	19020.7	19290.1	18189.9	21707.8	21601.4	21545	16542.9	19819.4	17754	20627.8	20746	17780.8	15780.4	18808.1	19253	22315.7	19403.4	21320.7	21090.8	20433.5	15048.3	20280.1	21831.2	22346.3	24420.3	21429.3	21320.1	8982	24986.5	13934.7	22138.4	18184.4	22465.7	18886.8	23178.2	14795.8	18081.6	19800.4	16407.8	18603.9
2		406.2 -> 58.892	12830.1	10247.9	13340.5	10990.5	12817.8	12026.3	14374.2	14443.4	12310	11389.6	13408.6	14028.7	13591.5	11111.5	12577.1	13103.6	12933	12088.8	11588.5	11734.1	12942	13435.7	12966	12259	12971.4	12873.6	13695.1	10557.4	10604.5	12261.7	13210.2	13980.3	12021.4	13080.2	6985.2	16837.5	10207.3	14975.6	12115.5	13715.9	12762	13311.8	10729.5	12741	14540.6	12732.4	12463
2		406.3 -> 56.992	11817.2	11487.1	9517.84	10017.8	11169.5	11022.1	13574.7	13811	13284.7	12735.5	14305.1	12764.6	14061.8	13515.9	13249	11510.4	14242	9839.94	10235.1	14143.4	13028.8	17360.6	13475.7	14518.7	12761	12882.2	13129.3	9424.58	9379.72	10083.9	10806.4	10134	10116.6	14419.4	6754.08	15005.4	11526.9	15145.3	14084.1	13602.6	14619.2	12780.5	12612.1	12647.1	15886.8	15320.1	12714.6
2		408.5 -> 59.192	15551	13307.8	15143.2	14475.4	14703.7	14478.7	16332.9	18332.9	17152.9	17964.1	18367.9	16226.5	17665.5	16886.5	17308.4	16441.3	17811.3	12796.7	14397.4	16612.9	17287	18889.3	16784	16422.1	18249	17809.6	17942.2	15160.3	14107	13337.9	14348.1	16606.6	13744.7	16769.2	10213.9	20069.4	15358.8	18774.9	17242.2	16614.6	19542	19043.4	14418.3	18782.4	18104.6	18001.2	16105.6
2		412.4 -> 59.092	11619.3	8726.22	13194.2	8550.9	11887.1	13117.8	13430.7	12257.6	13098.1	12290.6	13515.5	12365	13702.8	11255	13061.2	11847.4	11702.2	10395.1	12811.4	12042.2	11186.5	12247	13271.4	11615.9	12910.1	18140.8	13534.6	11962.3	11513.5	11681.3	12374.4	12952.4	11089.7	12067.4	5538.52	11496.7	18981.6	11835.6	10885.6	12843.9	11928.9	11900.8	31413.3	24296.4	10560.2	10399.1	12103
2		420.3 -> 96.992	31016.7	32201.4	28021.9	32628.5	34001.9	31890.9	37800.4	39448.9	38719.5	38411.6	39293	40900.1	39738.1	38143.9	40410.8	37504.2	38429.2	28845.1	30267.2	37871.3	39687.4	48672.6	38008.3	39601.9	39034.7	36686	39925.4	24704.3	31321.1	31193.3	33079.4	32798.7	30408	39284.9	18119.2	44024.8	30749.3	49992.3	39572.5	38863.9	37561.6	40205.6	30736.9	32003.4	50863.7	45957.9	37313.4
2		420.4 -> 71.092	12705.9	12718.8	13171.3	12550.1	13025.2	13501.2	15312.8	14367.8	14769.4	14399	15347.8	16075.2	17634.4	14539.6	14608.6	15360	16148.4	11734.5	13859.3	14982.9	14900.8	20475.3	17053.1	14144.2	15412.8	14878.1	15053.8	9836.72	11159.1	13440.3	13190.2	13401.7	12890.7	15289.5	7659.68	16860.4	13282.1	18113.8	15129	15376.5	16035.6	15253.9	12361.9	14666.4	18032.3	17218.4	15280.2
2		420.4 -> 95.092	14849.2	15145.3	15129.8	14809	14250.2	15567.7	17276.4	18338.9	19080.4	18866.8	18789.1	20679	19762.3	19402.1	20173.1	18290.2	19335.3	14053.5	16355	18169.4	16766.2	22104.1	18533.6	18414	18674.6	17037.4	19565.4	13051.3	16202.6	15012.3	15280.3	15922.9	15710	20403.2	7851.88	22806.9	14130.6	23758	19826.1	19047.3	19134.7	18238.6	14343.2	16462.6	22979.4	21719.7	17327
2		422.1 -> 96.792	17687.9	18413.8	16452.7	16739.3	17258.7	18204.9	19851.8	21897.8	21017.2	21379.9	21062.5	21477.9	21316.5	18426.8	22233	22046.6	22132.7	13514.8	16550.3	19327.1	21298.2	26039.6	20335.2	20254.3	20766.3	19923.4	21056.4	15156.1	16714.6	16075.1	16615.6	17734.2	16906.1	21322.1	10371.3	24809.2	17406.2	26803.2	20694.6	19397.9	21208.2	20966.9	18897.1	19591	25994.6	23417.5	19624.3
2		422.2 -> 68.892	7027.22	7148.44	6614.62	6693.36	7999.46	6852.76	8848.62	8499	9095.18	8062.92	9042.1	9624.78	8978.4	8929.08	8810.92	8506.94	9589.46	6950.14	7620	9207.42	8413.74	10489.7	8264.06	8704.7	8966.9	8412.78	8601.1	6585.72	7307.58	7270.56	6890.62	7936.16	6589.92	8439.76	4823.84	11388.8	8030.42	11506.5	9528.7	8546.42	8935.26	8929.74	7670.18	8557.22	10529.3	9346.04	7931.04
2		422.3 -> 98.992	17812.4	19841.3	16680.5	18293.8	18892.1	20200.7	24064.2	23980.4	22066.2	23064	24583.8	25539	23829.2	23827.7	24296.6	22740.8	25905.7	16312	18749	23106.6	22433.5	29428	22796.1	23012.4	23728.7	21852.3	23489.6	15084.5	19356.7	17999.9	18334.2	20567.4	18445.9	23005.3	11522	28275.9	20561.3	28822.3	23437.5	21114.7	23764.1	24735.3	19077.7	20052.1	28982.5	25980.5	21350.9
2		431.9 -> 86.592	6713.24	6105.04	7280.42	8259.7	6522.94	5589.88	7151.72	6220.24	8191.02	6950.22	9238.74	7699.4	7019.56	6920.68	8936.1	7630.36	8288	5863.32	7607	9115.66	9069.16	9349.88	9360.38	10324	8713.92	8041.54	9536.02	6607.24	6792.7	6451	7874.34	6341.82	9107.84	7777.28	3069.84	5902.96	15255.9	9804.34	8132.94	8371.14	14159.5	7434.6	13225.4	10477.2	10882.8	13693.5	9487.18
2		432.4 -> 103.092	14503.3	13700.9	16388.2	21186.4	16647.5	15335.1	16512.5	19447.7	19188.7	15697.7	21272.1	17774.9	16881.6	16619.5	19881.7	17771.6	20853.1	11733.9	21566.5	23839	21073.6	24372.9	20902	24098.5	19414.7	16885.8	22372.1	18240.9	15190.8	16474.1	16282.1	13455.5	20644.2	19293.4	6811.58	12171.7	37742.6	24366.1	20947.5	20155	35212.4	19447.2	32950.9	25176.2	26819.3	32314.1	25528.8
2		432.4 -> 107.092	54661.3	49142.8	63253.9	72827.2	66171.9	51408.7	58669.2	64625.2	70957.9	51114.7	77990.4	68841.1	64935.2	58655.9	71262.1	72264.4	72670.4	46936	81329.2	84783.4	85691.4	91146.1	78472.1	90942	77242.6	62029.8	89645.6	66513.2	59021.2	58756.9	61080.7	48785.3	76308.6	63727.3	17991.3	43394.1	153007	92557.5	77898.4	71300.1	144158	69136.8	127654	105410	99670.5	129828	94439.5
2		432.4 -> 83.092	36744.1	32557.1	40298.3	44119.7	38881.2	33172.7	39463.4	44791.2	44185.2	35424.6	49489.9	48104.1	44001.6	38765.1	49613.9	45244.7	50442.1	29964.1	49225.7	55371.5	54806.7	61603.9	51166.6	58501.3	48988.3	41404.8	53684.4	42899	36574.4	36479.4	40074	34501.7	48893.6	43065	13034.7	28005.6	87481	58401	49486	48955.5	82435.1	46039.1	73719.3	62042.2	66969.2	78557.6	58568
2		432.4 -> 85.092	37052.2	37014.9	40400.8	47044.9	38938.2	36531.3	40200.7	45128	49640.6	36869.8	50346.1	45402.3	44871.3	40182.3	49749.5	48168.1	51538.3	33036.6	51986.6	55182.9	56871.2	62405.2	50721.4	62295.8	50834	43677.5	52723.2	43636.1	38877	38811.7	41615.8	33379.6	51969.5	44196	14582.2	30817.6	87288.9	60248	48795.5	46444.9	85744.3	47154	81359.2	61745.4	68129.7	83554.3	60462.7
2		432.4 -> 87.092	24470.9	20890.4	26355.3	29321.7	26618.9	24119	24723.6	26751	30342.7	21677.2	31949.8	26707.8	27191.7	25153.1	28690.5	30489.8	29952	20484.1	33466.8	34939.8	37186.4	37378.4	31239.1	39693.5	33919	26279.7	35008	27638.1	23338.4	23810.4	24590.5	21665.4	34527.1	28736.5	8204.44	20191.4	61759.3	35681	30517.1	28555.5	54897	29335.2	49411.7	42367.1	42884	55020.2	41517.2
2		434.3 -> 84.992	10011	10192	9632.58	9737.64	8855.54	9725.56	10004.7	10942.6	11448.2	10763.3	11276.4	13057.1	11571.3	11808.8	11369.2	10942	12794.9	9048.96	9461.38	12071.5	11779.1	14546.5	10971.6	12063.1	12790.3	10472.8	12258.1	8228.28	8912.78	8516.88	10093	9749.7	9090.66	12742	5966.56	11660.2	11158.9	13841.9	11019.5	13189.5	11820.4	12504.9	9849.54	10901.5	12310.4	13844.7	10817.2
2		434.4 -> 109.092	12314.1	13010.8	11364.7	12361.3	11440.1	12425	16186.8	14491.5	15116.2	14096.7	14184.4	14532.7	14621.2	13269.3	14511.8	13664.6	14678	11158	11405.8	13377.6	14907.5	17413.7	15937.1	14251.9	14233.8	14648.1	14642.6	10796.1	11810.8	11218.1	12353.1	12061.3	11691.6	15549.6	7333.34	16601.7	12818.5	18013.1	14436.5	14548.3	13892	14095.2	11962.7	12805.7	19471.1	15346.7	13675.9
2		442.5 -> 57.192	5732.74	5486.08	5183.84	5461.64	6024.38	5872.62	6021.86	6678.96	6124.88	6460.2	6684.02	6839.06	6522.12	6914.6	6516.68	5870.36	6219.46	6585.34	5829.82	7710.62	7249.14	7941.48	6553.48	6790.52	6977.7	7204.9	6771.94	5454.26	5560.8	5002.12	4727.74	5581.88	5285.66	8107.78	4620.34	6470.72	5272.68	6310.7	7100.74	5938.9	5629.86	6986.56	4948.96	5630.9	6078.28	7096.64	6732.22
2		446.3 -> 96.992	10734	13156.6	10074.7	10924.6	11088.4	12364.9	14336.1	15037.2	13590.5	13459	15048.9	13684.1	14324.6	13900.5	14200.9	13536.6	13531.3	10638.8	10684.7	13940.7	13431.3	16711	14226.8	14521.4	13884.1	12579.3	13633.8	9830.8	11123.5	12001.7	10317.2	11445.1	10936.5	14066.9	7628.66	14255.4	10350.4	15843.6	13761	13532.5	10961.4	13711.9	8912.92	9618.62	17928.1	16244.7	12749.1
2		446.4 -> 119.092	12102.9	12839	12027.8	14417.5	10690.4	10884.3	10169	10950.1	12571.8	9395.04	12999.5	13158.5	10492.1	10136	13090	11876.3	13442.6	9363.64	13052	11606.3	14470.8	18128.1	15582.6	12427.5	12317.4	11892.5	12111.9	11394.9	11803.8	12038.9	10571.7	10059.5	16780.5	10719.1	3937.76	8909.42	17089.8	13613.1	12512.1	13092.6	17263.1	10661.8	17275.7	15219.1	17823.1	16481	12913.3
2		452.4 -> 107.092	3616.38	3624.24	3512.54	4121.68	3992.9	4111.5	4453	3561.14	4336.82	4533.8	4857.52	4424.16	5212.26	4776.82	3939.88	4248.06	4783.7	3628.2	3961.16	4034.9	4968.68	11948.6	4473.1	4402.24	4380.48	4454.6	5078.56	3900.72	3864.94	3664.42	3499.2	3735.22	4102.68	4101.8	2961.54	4752.02	4268.9	4407.08	4615.18	4388.3	4544.36	4550.64	3778.8	4365.56	5239.12	4455.02	4432.14
2		456.4 -> 133.092	3458.66	3538.6	3930.26	4181.6	3173.68	3457.96	3573.72	4529.66	3702.2	3592.76	4303.92	3667.26	3997.9	3898.14	3795.08	3444.44	3679.68	3512.26	3223.8	3776.74	4071.18	4606.42	4109.78	3992.1	3264.22	3653.42	3771.36	2954.36	2934.02	2820.4	3206.56	3067.44	3610	3749.3	2180.72	3818.02	4165.96	4780.74	3804.22	3514.84	4029.28	4823.3	4027.46	3586.94	4184.9	4610.02	4049
2		460.4 -> 111.092	8814.42	9629.42	7703.58	9351.36	9121.64	8757.64	9971.84	10810.3	10932.2	10134.8	9706.16	10736.3	11523.8	11543.8	11103.2	11161.6	11797.9	8250.04	8585.16	10829.7	9468.54	12832.7	10605.3	10672.8	9910.38	10125.3	11564.3	7337.46	8460.1	8660.08	8537.1	8713.86	8438.78	11560.1	5132.22	10145.3	7066.24	13326.8	11210.6	10603.8	8779.86	11006.4	7611.42	7315.02	14666.2	11801.7	10060
2		460.4 -> 137.092	6535	7955.2	7042	6720.42	6423.7	7587.64	8173.4	8524.68	8578.38	8571.88	8377.92	9149.96	8730.66	8227.64	8075.04	8821.46	8627.94	6016.94	6385.16	8279.56	8224.24	9197.78	9202.22	8599.36	8263.98	8007.4	8323.92	5705.96	6504.68	7040.62	6029.58	7293.04	6304.66	8552.8	4371.34	7775.28	5801.02	8814.2	8467.1	8466.94	7120.72	8209.42	5922.58	5654.86	9575.96	8652.98	8247.76
2		474.4 -> 99.092	12377.2	13185.2	12200.3	11812.9	12999.1	12767.2	13811.4	15789.2	14734.5	15074.2	16335.5	14725.3	14612.9	15001	14283.5	14505.5	15896.4	11843.8	12011	15321.9	14562.1	19208.5	14182.1	15529.7	17282.6	13259.4	16391.1	11210.8	12116.2	11251.5	11793.9	13250.2	13127.2	16602.3	8155.86	12480.9	9951.34	19513.5	15574	15969.1	11213	16704.7	10309	9816.08	19788.5	17457.6	14239.9
2		476.3 -> 128.992	2618.18	2973.58	2661.86	2850.28	3146.2	2910.8	3029.68	3549.32	3215.34	2649.62	3440.2	3147.34	3153.28	3132.04	2781.08	2876.56	3121.98	2459.18	2767.3	3302.76	3364.14	3482.84	2772.78	3260.08	2964.62	2588.04	3096.86	2868.24	2793.84	2844.96	2576.2	2703.1	2762.58	3121.38	2193.34	3265.5	2896.64	3760.3	3035.86	3193.1	3536.76	3021.44	2930.8	3123.72	3496.96	3046.12	3067.22
2		480.4 -> 207.092	10075.1	48798.8	11356.9	15830.3	9757.52	15231.7	6121.42	11038.5	4193.42	4025.3	7688.16	8099.44	12364.6	8587.06	8520.14	16448.5	4543.78	7489.58	8605.02	16338.4	4752.22	9572.12	5330.12	6042.88	5153.44	15637.6	6479.42	5832.74	17425.9	6867.1	9130.36	7668.08	22919	6418.28	2828.94	8867.4	4942.6	6170.08	4496.94	28174	6094.82	10475.7	5112.98	5216.24	5241.16	8637.02	13948.9
2		482.4 -> 282.192	4486.24	13160.3	4593.96	5336.6	4321.14	4921.72	3600.28	4908.54	3574.78	3259.56	4948.96	3924.9	5603.88	5099.68	5206.4	5424.26	3597.02	3284.48	4602.86	5437.32	3327.5	5406.4	3023.2	3410.56	3422.74	5481.36	4183.74	3259.96	6536.46	3710.34	4605.42	3906.48	6852.96	3530.2	2496.22	4081.5	3430.14	3717.2	4044.36	9121.1	3514.94	4182.52	2806.04	3520.04	4617.64	5232.46	6048.98
2		518.4 -> 133.092	4684.1	4001.84	5744.12	4562.74	5135.54	4611.44	4860.96	6077.6	5629.28	5104.3	7435.56	5120.54	5903.46	5663.46	5629.16	6045.88	5612.12	4024.54	5297.54	5068.04	5507.48	5533.22	5032.8	4522.86	4711.16	5205.98	5551.12	3582.4	4233.94	5149.76	5288.5	5004.7	4653.56	5187.74	2751.56	4747.1	7098.1	5121.86	6085.4	5382.88	5932.26	4936.96	8954.38	5942.92	4990.28	8565.32	5033.68
2		542.5 -> 45.192	2832.54	3611.82	3204.64	3095.42	3369.18	3056.3	3071.02	3468.46	3270.64	2942.58	3051.04	3449.7	3943.06	3455.36	3930.48	3644.7	3399.8	2944.48	3972.1	2952.3	4114.5	3700.62	3017.88	4243.92	3137.12	3054.32	3553.64	2714.54	2997.56	3593.18	2848.94	2747.36	3450.76	3333.32	2144.34	3030.36	3603.64	4101.02	3393.44	3676.4	3562.3	3654.46	4076.32	3598.46	3685.32	4004.38	3523.36
2		554.29 -> 266.392	3940.52	16767.3	4712.68	5508.24	3968.84	5617.18	2372.9	4638.28	2440.98	2615.34	3341.24	3680.72	4535.14	4482.9	3394.56	5083.64	2290.9	2988.78	3314.24	4948.86	2511.16	4127.5	3167.98	3151.76	2419.2	6283.02	3014.94	3238.3	6446.9	2921.9	3371.02	3212.6	6608.38	3266.26	1833.46	3651.42	2673.72	2916.18	2780.78	9783.82	3538.28	3673.3	2852.16	2826.18	2813.9	4287.86	5557.84
2		554.4 -> 207.092	7388.28	40505.3	10579.6	12174.9	6281.74	11648.5	3908.96	7244.5	3571.62	3702.88	6305.7	6138.54	9688.78	7166.44	5901.66	10910.7	3385.12	5723.42	7240.92	10688.7	4694.3	8130.94	4707.52	4914.28	3959.14	9916.94	5277.3	4812.18	12950.3	4825.22	6945.5	4927.66	13954.7	5290.48	2472.82	7952.1	3797.1	4175.4	3985.14	20239.7	4733.02	7473.06	4488.18	3921.26	3882.94	7902.54	10214.7
2		554.4 -> 281.092	23927.3	176509	36785	51337.5	22024.4	44277.8	10782.1	23996.1	5698.28	8986.48	18264.5	18208.2	35579.7	25821.5	17780.8	39329.2	8203	17113	23117	38405.7	9618.8	23655.9	12770.3	13759.2	7539.74	39299.6	15073.5	15331.4	49829.5	13791.6	21354.6	14470.3	60544	12559.1	3645.4	23941.4	9292.88	10917.3	8948.46	78040.6	11003.9	21904.1	12557.1	9291.68	9211.42	25398.9	39960.4
2		554.79 -> 282.192	4791.08	18363.5	6546.88	6683.8	6163.64	6843.44	3504.94	5940.26	3323	3963.72	5393.22	3871.1	6091.28	10956.1	8570.84	7624.16	3709.32	5698.92	6598.32	7173.6	5756.88	4762.08	4212.26	6222.24	3589.16	6279.08	4278.98	6522.82	7131.7	4647.46	5119.86	3673.46	7532.46	3774.54	2577.72	5382.6	3890.76	4561.08	3527.86	8880.82	3204.98	4515.02	3416.88	3749.84	5753.72	5927	8821.68
2		586.4 -> 89.092	3987.1	3920.26	3957.6	4094.4	4292.66	3704.78	4353.78	5584.14	4598	4198.54	4880.84	4517.2	5102.22	5732.78	4670.14	4815.08	5056.98	3354.4	6165.16	4216.6	5115.12	6145.52	5376.52	5383.88	4801.56	4557.18	5185.24	3518.64	3460.92	4449.46	3812.38	3964.1	4539.06	4250.88	2355.5	3713.74	6056.68	4615.28	4165.64	4397.08	6022	4723.46	7592.08	5595.7	6188.94	6378.9	5754.2
2		598.4 -> 223.092	4280.7	5890.26	3477.78	5082.5	2716.92	3902.24	2753.04	2431.68	2883.66	2709.04	3855.58	2780.12	3282.94	3278.04	2780.14	3748.88	3128.52	4900.14	3339.54	4881.12	2942.84	3121.54	3441.92	3478.72	3505.58	4317.52	4178.14	3759.68	3210.44	3237.84	3184.68	2974.66	6397.5	3506.04	1998.06	3466.44	9795.1	2788.32	3989.96	4302.02	14143.7	3546.58	10458.8	9574.3	2876.3	3310.8	4161.08
2		626.29 -> 280.982	20066.1	98165.6	19348.1	104123	19193.6	35072.4	5184.76	7398.36	5611.28	12435.5	14241.9	5737.6	10709.8	31263.1	6613.34	16635.5	11392.5	22886.8	26595.6	20720.7	7667.12	13060.8	11281.5	14316.4	7533.02	8744.76	6874.8	19672.1	15676.8	15030.8	18948.2	7155.94	108644	10824.9	3366.28	39227.6	5515.36	8670.4	9916.92	7331.1	10948.4	12239.5	21591.8	16995.5	7967.42	12345.4	13327.5
2		628.4 -> 281.092	20287.1	150393	32921.7	51886.5	19062.9	34098	7328.04	17138.2	4997.7	9580.78	14567.1	12260.6	25496.1	24013.3	11611.5	24955.5	7703.08	15091.8	20408.8	28193.4	9970.64	18402.7	11800	10911.8	6293.84	23807.3	10928.3	11150.5	40954.5	10786.2	20372.8	9519.62	53271.5	10359.8	3057.52	26804	9179.22	9326.82	7008.64	46677.8	13283.2	15633.9	13210.9	9764	7949.1	19711.9	32218
2		629.4 -> 282.092	6873.76	40718.3	10635.2	14262.1	6226.64	11492	3022.72	6079.84	3007.14	3703.26	5492.96	4233.04	8135.8	7688.62	5364.74	8802.84	3059.3	5793.24	7566.44	9209.82	3914.66	6782.2	5245.4	3589.04	3245.86	8567.58	4296.7	4480.62	13573.3	4344.64	5837.8	4579.2	15743.3	4041.84	2266.5	8178.78	3552.48	3749.92	3410.68	13714.2	4698.96	6148.24	4370.68	4267.34	2979.94	6023.48	9402.34
2		630.4 -> 281.092	8165.82	40049.6	10583.5	12400.3	7095.1	8830.62	3781.58	5959.36	3186.6	4058	5343.42	5238.78	8222.66	8114.76	4875.18	8643.32	3776.5	5077.7	6666.96	8634.54	4246.7	6746.7	4756.94	3997.48	3787.74	9664.38	4930.86	4588.04	12966.5	4618.14	7258.12	4009.74	13380.8	4340.94	2668.32	7923.86	4052.16	4141.68	3918.72	16493.3	4082.92	6198.28	4476.06	3901.2	3859.5	7176.54	9850.98
2		630.4 -> 282.192	3462.5	15714.6	5280.72	6237.24	3393.9	5196.8	2282.76	2925.22	2397.58	2996.3	3225.36	3267.92	4914.38	4183.72	3365.46	4577.34	2559.22	3388	3275.76	5032.8	2674.68	3961.68	3021.52	3256.84	2423.32	4563.86	2846.96	3017.72	5850.98	2629.36	3898.86	2757	7326.98	3061.7	1995.42	4241.44	2582.66	2787.36	2096.62	6350.16	2968.22	3375.44	2715.3	2834.86	2688.72	4035.7	4966.78
2		630.4 -> 283.092	7292.14	40847.3	10482.5	15121.8	6656.78	10694.5	3979.1	6013.92	3804.34	4599.02	5293.66	4662.14	8630.44	9953.18	4938.04	7972.68	3705.46	5713.72	6185.52	7682.94	4513.32	6707.64	4935.88	5411.48	3795.96	8526.62	4846.68	5523.34	11914.9	4906.68	6976.28	4282.84	15428.5	4753.58	2476.16	8397.3	4146.32	4972.78	4156.34	14219.3	5110.08	7166.48	4624.86	4254.4	3853.8	7203.24	9159.14
2		630.4 -> 357.092	41030.8	348659	75144.6	80123.6	33647.7	67942	15647.5	34989.1	6847.62	14455.6	25760.1	27497.3	59203.7	42038	25744.8	52957.9	11378.7	27316.2	37484.6	55021	17819	39589.2	24062.8	19956.6	12372.9	56792.5	20311.8	20405.1	97568.5	18574.3	39312.5	19771.3	81822.8	20271.6	4714.14	43127.8	15152.9	14266.4	11186.6	119154	19592.4	34192.4	20032.7	13649.4	10864.9	43026.2	67531.6
2		632.4 -> 359.092	5224	29107.8	7602.76	8139.12	4566.28	7746.68	2904.28	5010	2606.36	2989.08	4321.06	4178.48	7432.96	5762.12	4232.16	7068.16	3077.48	4695.72	5230.04	7406.66	3862.34	5688.5	4483.3	4173.72	3199.58	6928	3931.22	3736.98	9834.7	3637.22	5294.08	3772.36	9889.84	4195.68	2287.9	6492	2718.22	3368.84	2814	12224	3196.48	4974.46	3192.28	3196.5	2892.94	5214.56	7824.84
2		638.5 -> 339.192	9453.72	7423.8	4871.54	14209.7	4986.6	7300.76	7093.74	7061.08	6545.02	3145.98	4373.26	5830.02	7111.9	5982.5	7214.52	4744.28	5504.66	6822.56	8018.38	4019.54	6501.98	6898.84	5582.46	4586.66	5894.04	4921.56	3843.14	5643.84	9443.96	7236.42	6045.46	6917.02	6973.32	7769.6	4098.08	5046.48	4110.7	7908.08	6298.96	5523.22	5806.22	10150.4	5994.62	5572.58	5031.08	6048.92	5234.32
2		640.29 -> 340.982	13598.6	10056.7	9261.56	12727.9	9204.56	9663.24	9206.18	11076.7	10159.5	5950.28	9054.94	10182.8	12226.4	8680.14	8643.04	9571.48	10044.6	9037.52	10902.3	9545.28	12188.3	13283.1	9569.02	9591.84	11259.2	8219.66	9007.6	8746.2	10193.2	10130.8	9651.94	8823.4	10236.2	9962.82	4775.32	8270.66	6610.2	12528.9	10951.3	11070	9489.72	10446.4	10102.5	6738.3	11206.6	12930.5	8795.78
2		640.4 -> 339.092	15684.8	12426.2	9896.58	16874.9	10343.7	12763.4	10683.2	13369.9	11593.1	5887.18	11371.8	12437.5	12467.8	9467.82	11484.1	10860.6	14550.4	13263.2	13007.8	11606	13989.4	15925.9	12203.4	10167.2	12304	9999.16	9234.92	8903.7	12316.5	10935.1	12543.7	11178.3	13229	13750.8	6396.2	10109.5	8242.26	15161.9	12748.9	12758.5	10274.6	13152.2	9684.66	8820.74	14467.9	16246.7	12115.7
2		642.29 -> 266.982	16916.5	20686.2	16129	15442.4	17408.4	18829.5	26199.6	21122.2	19693.1	12055.8	22616.1	20763.7	19136.7	27817.5	23022.1	19068.7	24153.7	19960.1	18702.5	22381.5	21146.6	34049	20688	25161.5	19513.5	17135.9	19242.7	17139.7	18765.9	20756.1	17826.2	16281.3	14656.1	20185.3	8803.2	33426.8	32480.5	40691.3	21191.2	19146.8	25491.8	19464.5	27070.6	23652.2	37203	30404.9	23143.8
2		656.4 -> 281.092	4745.3	5867.9	4886.98	4899.94	4957.84	4964.86	5342.04	5193.62	4172.8	4485.06	5791.24	4431	5245.54	5083.54	5074.18	4898.22	6238.22	4641.38	4572.38	5045.4	4574.64	7449.94	5721.42	6050.38	5514.5	6335.86	5028.72	5396.3	4868.96	4748.28	5086.64	4664.9	4192.5	5767.7	2778.72	6454.32	5515.78	7567.58	5143.8	5658.44	4486.84	4144.36	4373.7	4751.18	8175.22	6796.08	4793.84
2		702.5 -> 355.192	69861.8	613763	135027	152447	54289.7	108920	17487.1	42651.4	9357.78	21285.4	40522	26991.9	83455.2	85672.3	37877.6	70370.7	16380.1	49583.7	63427.4	82969.1	30560.3	60627.9	40158.7	32250.5	16886.2	69962.5	25561.2	33247.9	161203	28399.5	66768.6	30932.6	137092	33779.2	6928	80547.4	25080.4	20615.5	15832.9	139173	33794.8	49889.4	33089	20824.3	16981.1	65037.3	111085
2		702.5 -> 429.192	55192	499319	109826	107547	42621.2	90837.4	14365.9	34833.9	7615.22	16949.1	33552.2	23552	73481.1	69456.9	30279.2	55251.6	13404.7	38803.5	50469.2	72397.7	24611.8	51142.7	31151.3	21789.5	13823.1	58584.6	22496.7	26036.9	131815	23331.3	55815.7	23447.9	105028	27258.5	4570.34	63494.8	21207.6	15852.9	11606.2	118682	28468.5	39812.2	23732.6	16241.3	12994.9	54530.9	91955.6
2		704.5 -> 282.192	4482.16	16949.8	5248.62	5661.78	3605.06	4709.64	2382.12	3597.04	2234.62	2904.6	3510.12	2953.34	4427.72	17181	3449.18	4802.58	2724.24	3678.44	3955.78	7354.92	3359.32	3946.88	2828.86	3645.12	2555.94	3674.36	3740.1	3712.28	6590.32	3295.94	4227.94	2696.44	6100.02	2987.48	1968.32	3931.7	3523.04	4652.3	2287.64	4923.26	3093.16	3389.42	2564.98	2601.4	2967.6	4245.6	5609.18
2		704.5 -> 357.192	17079.2	126912	29089.5	32453	15124.3	24436.2	6287.9	10841.3	3613.04	7281.46	12392.7	8623.26	21201.8	19930.7	10456.7	16631	5646.14	12152.7	17060	21561.6	7427.14	13716.6	10086.2	8773.24	5170.86	18958.4	7096.5	9349.68	36116	8186.74	15291.3	8558.68	29800.1	9955.14	3048.32	17830.8	8417.86	5619.92	5007.72	32985.2	8825.14	11140.7	8786.76	6339.78	5549.66	17312.1	25782.3
2		704.5 -> 431.192	17547.2	136592	30446.7	32050.8	14931.8	25862.1	5746.52	10285.2	4201.76	6607.84	11020.4	8033.68	20663.6	19217.3	9654.66	17681.7	5576.16	12336.5	15823.5	19279	8824.56	14921.8	10844.8	8522.56	5306.82	18799.3	7999.32	8572.52	37596.5	8582.52	16616.4	8689.32	29623.5	9721.4	2728.7	19723.5	7692.86	5879.32	4460.1	33171.3	9424.86	12951.2	8619.26	6357.04	5392.42	17334.2	28195.3
2		705.4 -> 358.092	7313.98	48501.6	11800.5	12671	5734.68	10977.6	3414.64	5308.76	2586.66	4082.78	5393.64	4494.72	8817.62	7913.26	4612.42	7159.1	3094.58	5525.16	6492.4	8306.5	4167.24	5857.04	5211.74	4151.7	3223.9	7252.3	3866.2	4682	14026.2	4358.38	7258.02	4421.68	12541.2	4451.3	2120.7	8757.38	4065.12	3588.44	3264.1	14305.5	4429.54	5332.56	4487.92	3575.7	3026.58	7924.46	10838.6
2		705.5 -> 356.192	6754.82	37277.1	11735.3	10790.9	5673.14	9770.32	2999.6	4663.58	2187.86	3795.18	4777.22	3503.9	7427.24	7060.58	3583.84	6957	2895.34	4672.64	5629.3	7893.44	3620.24	5674.32	4469.08	3909.02	2951.14	6557.06	3180.28	3923.92	13072.4	3915.18	6371.14	4232.32	11534.3	5030.26	2220.6	6788.44	3533.44	2847.08	2700.72	12038.5	4327.22	4916.92	3864.78	3146.28	2832.06	6505.76	9335.18
2		706.4 -> 357.092	6704.84	37602.6	10618.4	9080.06	5591.02	9631.82	2745.06	4450.62	2627.28	3355.06	4368.5	3124.72	7084.38	6475.76	4006.32	6549.68	3298.98	4427.06	5777.44	7777.82	3761.64	4634.44	4617.34	4260.2	3006.16	6835.82	3550.72	4487.9	10986	4152.62	6680.8	4086.54	10757.3	4263.6	2171.66	7626.22	3691.36	3559.12	2710.44	11639.9	4035.28	5026.46	3918.3	3457.08	2832.86	5841.5	9157.16
2		716.3 -> 340.992	6214.36	8375.24	5319.36	6928.14	6559.58	5394.02	5501.94	6177.82	5985.02	5166.82	6470.48	6369.88	6140.76	6226.62	6473.92	6060.62	6871.34	5641.7	6374.1	5784.86	5668.72	9819.96	6558.38	7020.94	7261.56	6927	6898.76	5448.78	5687.98	6176.96	6107.16	5712.36	7235.24	5790.6	3202.1	7387.52	7345.96	8620.66	6420.22	5455.6	7742.56	5865.46	6749.36	6597.78	9682.44	9409.74	5568.86
2		768.4 -> 415.092	2614.14	2312.5	2458.86	2936.06	2402.78	2527.32	2519.86	2833.42	2493.56	2714.22	2463.14	2906.02	2778.02	2386.86	2599.94	2644.32	2431.5	2293.02	2739.28	2741.1	2718.04	3088.06	2663.34	3721.68	2912.9	2609.16	2632.04	2523.92	2412.28	2488.9	2557.22	2397.2	2687.02	2531	1805.88	2588.78	3818.42	3410.66	2732.86	2623.94	4217.92	2677.9	4199.1	3227.48	3237.4	3590.82	3025.44
2		776.4 -> 503.092	23554.8	186548	45104.5	44719	19007.8	32197.2	5909.28	9959.1	3793.42	7701.74	13417.7	7814.6	23163.6	29684.2	10369.3	16902.9	6167.38	15954	20147.5	24830.9	11372.3	17860.1	15155.1	9868.56	5630.44	17508.3	8435	10737	54257.4	9780.46	23147.6	10184.9	38609.4	12632.1	2682.98	29632.8	9878.34	7500.38	5398.4	34645.3	11183.1	13427.1	10486.5	6873.16	5767.32	21598.3	33247.2
2		776.5 -> 429.192	30017.8	244894	57219.1	62744.5	22790.3	42526	5868.08	13548.5	4418.64	10378	18269.3	9880.64	30578.8	39540.7	12110.3	21233.9	6576.38	19858.6	28375.2	31095.9	13737.7	24457.1	16718.8	12314.7	7160.32	21385.1	8683.8	12779.5	69014	11448.1	31339.8	12400.8	52336.8	14835.5	3457.8	39048.7	12811.9	8636.2	5418.86	46259.9	15723.9	17667.5	13305.4	10160	7119.26	27463.1	42306.8
2		777.9 -> 280.592	3596.94	17646.3	5320.58	5665.82	3049.96	4291.66	2073.2	2694.74	1943.32	2518.46	2830.9	2508.86	4036.76	3876.2	2622.78	2970.18	2281.56	3430.04	3127.24	3345.76	2585.92	3238.72	2946.9	2450.5	2217.62	3890.96	2368.62	2434.82	6408.34	2707.02	4425.1	2661.14	5163.34	2889.96	1990.58	4997.94	2717.86	2423	2225.92	4833.12	2787.9	3627.46	2423.98	2217.34	2295.38	3269.38	4665.9
2		778.3 -> 504.992	9795.1	60029.9	16602.6	16011.4	7351.28	11122.4	2941.92	4265.5	2443.12	4019.46	5692.82	3668.2	7247.3	11878.2	4259.68	6703.58	3128.36	5964.22	7548.36	10196.6	5048.78	6993.36	5860.6	4170.42	3141.22	6896.86	4169.46	4347.96	18326.7	4394.44	9265.06	3922.64	13924.4	4620.98	2177.9	10730	4950.42	4048.38	3113.02	11634.2	5583.2	5727.18	5193.78	3663.08	3225.3	7178.1	12042
2		778.4 -> 431.092	15437.1	94715.1	23682	26584.9	11629.4	17310.9	4203.58	6664.42	2464.12	5335.84	8505.2	5466.74	14127.4	17456	6387.3	10358.2	4441.4	10359.6	12180.6	14764	7248.06	10160.1	8626.38	6109.08	4576.18	9927.56	5713.86	7158.18	28531.6	6564.84	14324.2	6646.66	22895.6	7138.88	2266.12	16979.8	6614.76	4816.1	3765.24	18070.5	7732.04	8216.28	5429.32	4789.3	3907.16	12445	19332.6
2		778.5 -> 281.192	10102.5	64749.6	17040.9	17742.5	7621.06	11446.6	3747.68	5464.84	2998.5	4866.6	6223.26	4354.98	9678.36	12035.4	5267.06	7606.92	3757.7	6414.64	8975.58	10640.6	5933.04	7722.26	7457.72	5802.06	3625.2	7263.96	4168.52	5599.52	19730.5	4865.7	9595.48	5983.12	16408.6	5302.62	2555.24	12083.2	5821.48	3999.96	3360.02	14925	5736.06	6952.42	5701.74	3573.9	3574.4	9609.26	13569.4
2		778.5 -> 282.192	4573.48	22466.7	7795.46	6538.16	3417.16	4859.92	2440.86	2799.14	2034.34	2393.3	3070.22	2700.82	4995.4	4661.1	2547.38	3446.66	2343.88	3893.38	4349.48	4224.24	2804.5	3642.24	3330.36	2968.98	2514.86	3595.82	2558.36	2878.46	7542.02	2324.36	4197.28	2792.46	5799.7	3033.24	1936.78	4714.86	2885.08	2218.4	2084.82	5707.98	2767.18	3095.72	2619.38	2277.66	2568.46	4867.16	5668.8
2		778.6 -> 429.292	5744.56	25798.9	8113.96	8675.16	4485.96	5845.28	2825.2	3188.78	2281.96	2751.44	3464.98	2669.42	5506.78	5585.38	2945.34	3938.84	2709.76	4422.24	4584.36	5097.54	3610.7	4966.4	4333.12	3480.26	2724.12	3635.82	2914.44	3266.86	10343.8	3172.44	5063.64	3481.1	7015.86	3705.7	2164.3	5354	3150.6	2956.62	2700.22	7888.14	4147.94	4011.58	3537.64	2727.34	2476.12	5310.2	7116.5
2	TAG(48:1)_FA 16:0	822.8 -> 549.8	2357.54	4460.98	7517.14	4952.5	4671.5	4026.62	3940.2	3733.32	3954.48	3094.3	2792.3	3504.7	4666.7	3589.68	6107.9	3296.24	3638.1	3321.32	4321.62	2694.92	3403	3270.48	3079.42	4868.28	4378.88	8741.34	2527.04	44938.8	6354.88	3782.6	2856.34	4777.88	2931.52	4442.56	2803.7	2626.14	2917.18	8911.18	4277.04	3595.16	2645.8	5035.26	2537.28	2388.06	3709.5	3270.54	5091.46
[truncated: 16 more columns]
